# Supplementary material
Source: PubMed Central journal article supplement (PMC5373841)
Supplement: NIHMS853578-supplement-Supp___Figures.pdf [file NIHMS853578-supplement-Supp___Figures.pdf]

## **Supplementary Information:**

### **Frequent mutations of chromatin remodeling genes in transitional cell carcinoma of the bladder**

Yaoting Gui\*, Guangwu Guo\*, Yi Huang\*, Xueda Hu\*, Aifa Tang\*, Shengjie Gao, Renhua Wu, Chao Chen, Xianxin Li, Liang Zhou, Minghui He, Zesong Li, Xiaojuan Sun, Wenlong Jia, Jinnong Chen, Shangming Yang, Fangjian Zhou, Xiaokun Zhao, Shengqing Wan, Rui Ye, Chaozhao Liang, Zhisheng Liu, Peide Huang, Chunxiao Liu, Hui Jiang, Yong Wang, Hancheng Zheng, Liang Sun, Xingwang Liu, Zhimao Jiang, Dafei Feng, Jing Chen, Song Wu, Jing Zou, Zhongfu Zhang, Ruilin Yang, Jun Zhao, Congjie Xu, Weihua Yin, Zhichen Guan, Jiongxian Ye, Hong Zhang, Jingxiang Li, Karsten Kristiansen, Yingrui Li, Xiuqing Zhang, Songgang Li, Jian Wang, Huanming Yang, Jun Wang, Zhiming Cai

\*These authors contributed equally to this work.

Correspondence should be addressed to: Zhiming Cai (caizhiming2000@yahoo.com.cn), Jun Wang (wangj@genomics.org.cn) or Huanming Yang (yanghm@genomics.org.cn).

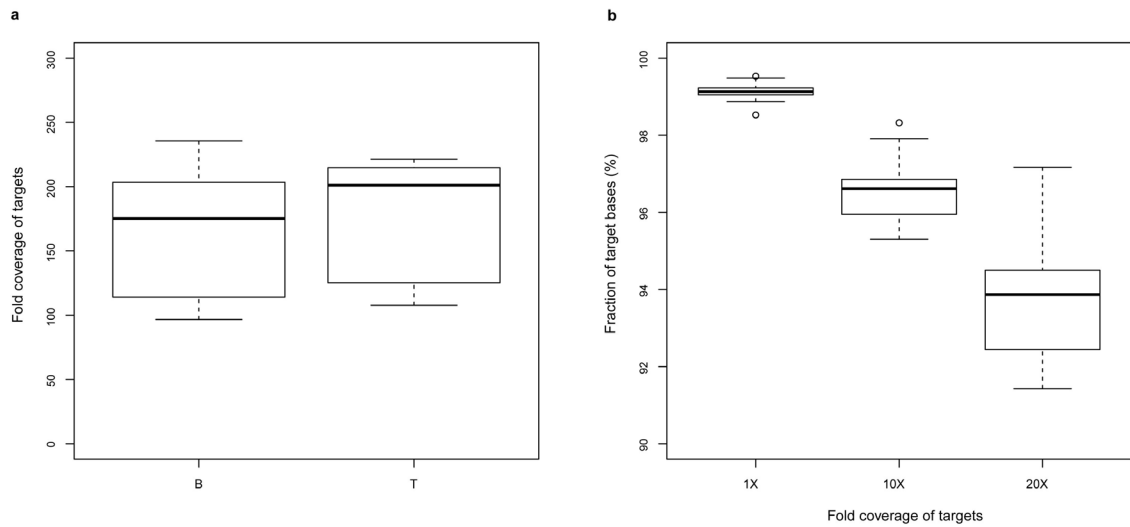

**Supplementary Figure 1. Fold coverage of target regions for the peripheral blood and tumor samples sequenced in the Discovery Screen. a,** The box plot depicts the distribution of mean coverage of all tumor and blood samples sequenced in the discovery stage. Lines in the two central boxes show the medians, and lines outside the two central boxes show the first and the third quartiles of the mean depths. B, peripheral blood; T, tumor samples. **b,** The box plot depicts the distribution of fraction of targeted bases covered by at least 1 $\times$ , 10 $\times$  and 20 $\times$  across the 18 samples sequenced in the Discovery Screen. Lines in the inner three boxes show the medians, and lines outside the three boxes show the first and the third quartiles.

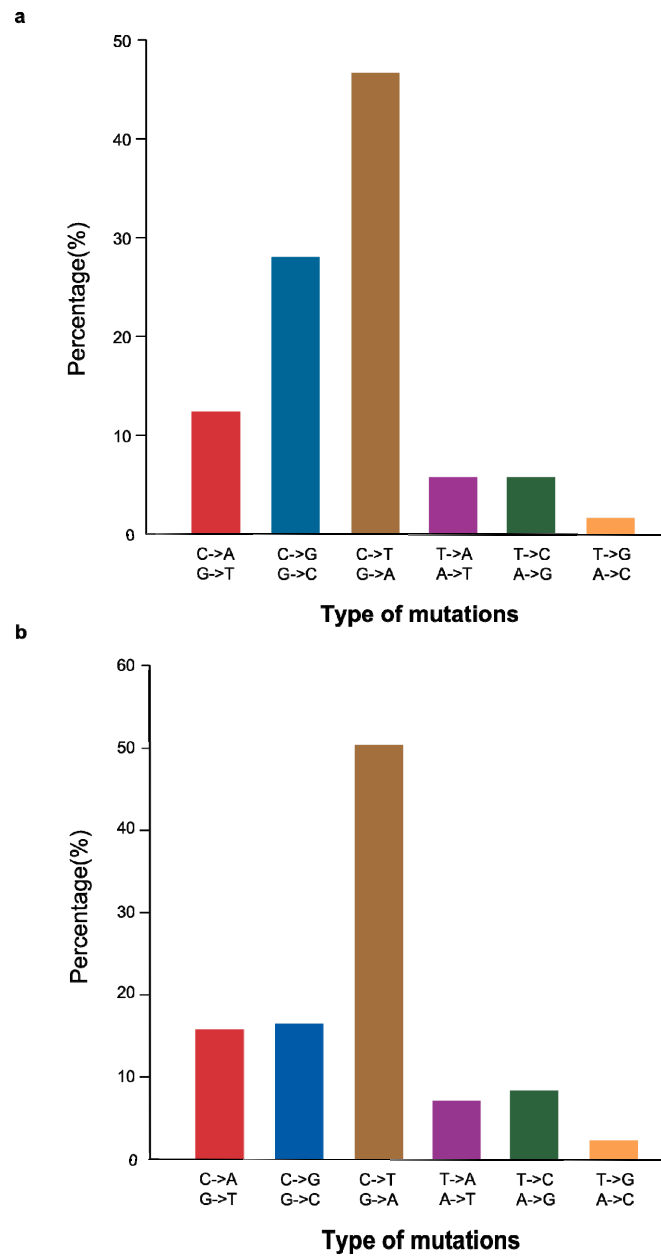

**Supplementary Figure 2. Spectrum of somatic point mutations identified in the Discovery Screen (a) and the Prevalence Screen (b). The mutation spectrum for the single-base substitutions detected in the 97 TCCs was dominated by C:G->T:A transitions ( $P = 0.02$ , Wilcoxon test).**

**Supplementary Table 1. Clinical characteristics of the TCC patients sequenced in the Discovery Screen and the Prevalence Screen.**

| Patient ID | Patient age (years) | Sex | Smoking status | Stage (TNM classification*) | Grade | Screen stage |
|------------|---------------------|-----|----------------|-----------------------------|-------|--------------|
| B2         | 55                  | M   | Smoker         | T2N0M0                      | 3     | Discovery    |
| B5         | 53                  | M   | Never smoking  | T4N0M0                      | 2     | Discovery    |
| B8         | 55                  | M   | NA             | T3N0M0                      | 3     | Discovery    |
| B9         | 81                  | M   | Never smoking  | T3N0M0                      | 3     | Discovery    |
| B10        | 52                  | M   | NA             | T2N0M0                      | 2     | Discovery    |
| B13        | 64                  | M   | NA             | T2N0M0                      | 2     | Discovery    |
| B15        | 40                  | M   | Never smoking  | T4N0M0                      | 2     | Discovery    |
| B17        | 61                  | M   | NA             | T2N0M0                      | 2     | Discovery    |
| B20        | 66                  | M   | Never smoking  | T4N0M0                      | 3     | Discovery    |
| B14        | 57                  | M   | Never smoking  | T2N0M0                      | 2     | Prevalence   |
| B16        | 72                  | M   | Never smoking  | T1N0M0                      | 3     | Prevalence   |
| B18        | 66                  | M   | Never smoking  | T1N0M0                      | 2     | Prevalence   |
| B21        | 61                  | M   | Never smoking  | T4N0M0                      | 1     | Prevalence   |
| B22        | 79                  | M   | Never smoking  | T4N0M0                      | 2     | Prevalence   |
| B23        | 85                  | M   | Never smoking  | T1N0M0                      | 3     | Prevalence   |
| B24        | 53                  | M   | Smoker         | T4N0M0                      | 1     | Prevalence   |
| B25        | 65                  | M   | Never smoking  | T4N0M0                      | 3     | Prevalence   |
| B34        | 66                  | M   | Never smoking  | T3N0M0                      | 3     | Prevalence   |
| B35        | 80                  | M   | Never smoking  | T1N0M0                      | 2     | Prevalence   |
| B36        | 65                  | M   | Never smoking  | T2N0M0                      | 2     | Prevalence   |
| B37        | 71                  | M   | Never smoking  | T4N0M0                      | 3     | Prevalence   |
| B41        | 69                  | M   | Never smoking  | T3N0M0                      | 2     | Prevalence   |
| B43        | 43                  | M   | Never smoking  | T3N1M0                      | 3     | Prevalence   |
| B45        | 82                  | M   | Never smoking  | T1N0M0                      | 1     | Prevalence   |
| B47        | 84                  | M   | Never smoking  | T3N0M0                      | 3     | Prevalence   |
| B50        | 73                  | M   | Smoker         | T2NXMX                      | 2     | Prevalence   |
| B52        | 57                  | M   | Never smoking  | T3N0M0                      | 1     | Prevalence   |
| B54        | 49                  | M   | Never smoking  | T4N0M0                      | 2     | Prevalence   |
| B55        | 41                  | M   | Never smoking  | T3N0M0                      | 2     | Prevalence   |
| B56        | 41                  | M   | Never smoking  | T1NxMx                      | 2     | Prevalence   |
| B57        | 72                  | F   | Never smoking  | T2NxMx                      | 1     | Prevalence   |
| B59        | 67                  | F   | Never smoking  | T3NxMx                      | 2     | Prevalence   |
| B59-0      | 50                  | M   | Never smoking  | T2NxMx                      | 2     | Prevalence   |
| B59-1      | 43                  | M   | Never smoking  | T1N0M0                      | 1     | Prevalence   |
| B60        | 80                  | F   | Never smoking  | T4N0M0                      | 3     | Prevalence   |
| B61        | 53                  | F   | Never smoking  | T3N0M0                      | 3     | Prevalence   |
| B63        | 70                  | M   | Smoker         | T2N0M0                      | 3     | Prevalence   |
| B64        | 66                  | M   | Smoker         | T1N0M0                      | 1     | Prevalence   |
| B65        | 87                  | M   | NA             | T3N0M0                      | 2     | Prevalence   |
| B66        | 54                  | M   | Never smoking  | T2N0M0                      | 2     | Prevalence   |
| B66-0      | 50                  | F   | Never smoking  | TaN0M0                      | 3     | Prevalence   |
| B68        | 85                  | M   | Never smoking  | T2N0M0                      | 2     | Prevalence   |
| B69        | 87                  | M   | Never smoking  | T4N0M0                      | 1     | Prevalence   |
| B70        | 65                  | M   | Never smoking  | T2N0M0                      | 2     | Prevalence   |
| B71        | 65                  | M   | Smoker         | T2N0M0                      | 3     | Prevalence   |
| B73        | 44                  | M   | Never smoking  | T1N0M0                      | 1     | Prevalence   |
| B74        | 60                  | M   | Never smoking  | T3N0M0                      | 3     | Prevalence   |
| B77        | 75                  | M   | Smoker         | T1N0M0                      | 2     | Prevalence   |
| B78        | 80                  | M   | Never smoking  | TaN0M0                      | 2     | Prevalence   |
| B79        | 63                  | M   | Never smoking  | T3N0M0                      | 2     | Prevalence   |

**Supplementary Table 1 continued. Clinical characteristics of the TCC patients sequenced in the Discovery Screen and the Prevalence Screen.**

| Patient ID | Patient age (years) | Sex | Smoking status | Stage (TNM classification*) | Grade | Screen stage |
|------------|---------------------|-----|----------------|-----------------------------|-------|--------------|
| B80        | 76                  | M   | Smoker         | T4N0M0                      | 3     | Prevalence   |
| B81        | 63                  | M   | Never smoking  | T2N0M0                      | 3     | Prevalence   |
| B59-3      | 65                  | M   | Smoker         | T2N0M0                      | 2     | Prevalence   |
| B62-0      | 58                  | M   | Smoker         | T1NoMo                      | 1     | Prevalence   |
| B80-0      | 82                  | M   | Never smoking  | T1N0M0                      | 2     | Prevalence   |
| B80-3      | 51                  | M   | Smoker         | T4N0M0                      | 2     | Prevalence   |
| B80-4      | 54                  | M   | Smoker         | T1N0M0                      | 1     | Prevalence   |
| B80-7      | 58                  | M   | Smoker         | T3N0M0                      | 2     | Prevalence   |
| B80-8      | 63                  | F   | Never Smoker   | T2N0M0                      | 3     | Prevalence   |
| B80-11     | 28                  | M   | Smoker         | T1N0M0                      | 1     | Prevalence   |
| B80-13     | 63                  | M   | Never smoking  | T1N0M0                      | 1     | Prevalence   |
| B81-1      | 62                  | M   | Never smoking  | T2N0M0                      | 1     | Prevalence   |
| B82        | 56                  | M   | Smoker         | T3N0M0                      | 2     | Prevalence   |
| B83        | 84                  | F   | Never smoking  | T3N0M0                      | 1     | Prevalence   |
| B84        | 64                  | M   | Never smoking  | T1N0M0                      | 1     | Prevalence   |
| B85-0      | 76                  | M   | NA             | TaN0M0                      | 1     | Prevalence   |
| B85-2      | 74                  | M   | Never smoking  | TaN0M0                      | 1     | Prevalence   |
| B86        | 48                  | M   | Never smoking  | T2N0M0                      | 1     | Prevalence   |
| B87        | 57                  | M   | Never smoking  | T1N0M0                      | 2     | Prevalence   |
| B88        | 56                  | M   | Never smoking  | T3N0M0                      | 2     | Prevalence   |
| B89-1      | 65                  | M   | Never smoking  | T2N0M0                      | 2     | Prevalence   |
| B89-3      | 65                  | M   | Never smoking  | T3N0M0                      | 1     | Prevalence   |
| B89-4      | 71                  | M   | Never smoking  | T1N0M0                      | 1     | Prevalence   |
| B89-5      | 50                  | M   | Never smoking  | T1N0M0                      | 1     | Prevalence   |
| B89-10     | 65                  | M   | Smoker         | T1N0M0                      | 1     | Prevalence   |
| B89-12     | 72                  | F   | Never smoking  | T2N0M0                      | 3     | Prevalence   |
| B89-16     | 68                  | M   | Never smoking  | T1N0M0                      | 1     | Prevalence   |
| B90        | 84                  | M   | Never smoking  | T1N0M0                      | 1     | Prevalence   |
| B96        | 69                  | M   | Smoker         | T3N0M0                      | 2     | Prevalence   |
| B98        | 63                  | M   | Smoker         | T3N0M0                      | 3     | Prevalence   |
| B99        | 37                  | F   | Never smoking  | T1N0M0                      | 1     | Prevalence   |
| B100       | 25                  | M   | Smoker         | T1N0M0                      | 1     | Prevalence   |
| B101       | 69                  | F   | Never smoking  | T1N0M0                      | 1     | Prevalence   |
| B102       | 45                  | M   | Never smoking  | T1N0M0                      | 1     | Prevalence   |
| B103       | 54                  | M   | Smoker         | T1N0M0                      | 1     | Prevalence   |
| B104       | 52                  | M   | Never smoking  | T2N0M0                      | 1     | Prevalence   |
| B104-0     | 72                  | M   | Smoker         | T1N0M0                      | 1     | Prevalence   |
| B105       | 62                  | M   | Never smoking  | T2NxMx                      | 1     | Prevalence   |
| B105-0     | 60                  | M   | Never smoking  | T2NxMx                      | 1     | Prevalence   |
| B105-1     | 64                  | M   | Never smoking  | T2NxMx                      | 2     | Prevalence   |
| B106       | 56                  | M   | Smoker         | T2NxMx                      | 1     | Prevalence   |
| B107       | 68                  | M   | Never smoking  | T2NxMx                      | 3     | Prevalence   |
| B109       | 46                  | M   | Never smoking  | T1N0M0                      | 1     | Prevalence   |
| B110       | 54                  | M   | Smoker         | T1N0M0                      | 1     | Prevalence   |
| B111       | 45                  | M   | Smoker         | T1N0M0                      | 1     | Prevalence   |
| B112       | 62                  | M   | Smoker         | T1N0M0                      | 1     | Prevalence   |
| B114       | 73                  | M   | Never smoking  | T1N0M0                      | 1     | Prevalence   |

\* The TNM cancer staging system was designed to gauge the extent of cancer in a patient's body. T describes the size of the tumor and whether it has invaded nearby tissue, N describes regional lymph nodes that are involved, and M describes distant metastasis (spread of cancer from one body part to another). NA, not available.

**Supplementary Table 2. Summary statistics of exome sequencing data obtained from the nine TCC patients in the Discovery Screen.**

| Case | Sample | Total reads | No. of uniquely mapping reads* | % of uniquely mapping reads* | No. of reads overlapping targets | % of reads overlapping targets | No. of non-duplicated reads | Mean fold coverage | % of targets covered by at least 1 × | % of targets covered by at least 10 × |
|------|--------|-------------|--------------------------------|------------------------------|----------------------------------|--------------------------------|-----------------------------|--------------------|--------------------------------------|---------------------------------------|
| B2   | Blood  | 237,124,039 | 167,653,431                    | 70.70                        | 126,490,236                      | 53.34                          | 21,836,424                  | 175.21             | 99.48                                | 96.67                                 |
|      | Tumor  | 233,283,541 | 176,961,865                    | 75.86                        | 119,248,541                      | 51.12                          | 22,213,417                  | 214.70             | 98.88                                | 97.53                                 |
| B5   | Blood  | 84,087,752  | 74,966,971                     | 89.15                        | 44,514,793                       | 52.94                          | 19,056,226                  | 96.62              | 99.04                                | 95.95                                 |
|      | Tumor  | 96,829,842  | 87,478,265                     | 90.34                        | 50,772,926                       | 52.44                          | 21,276,835                  | 107.72             | 99.28                                | 96.44                                 |
| B8   | Blood  | 245,519,105 | 191,149,580                    | 77.86                        | 109,361,409                      | 44.54                          | 18,594,429                  | 203.43             | 99.13                                | 97.00                                 |
|      | Tumor  | 254,388,669 | 204,186,645                    | 80.27                        | 107,605,321                      | 42.30                          | 26,854,513                  | 201.10             | 99.03                                | 95.86                                 |
| B9   | Blood  | 252,596,951 | 200,042,184                    | 79.19                        | 105,024,854                      | 41.58                          | 17,912,219                  | 193.38             | 98.53                                | 95.30                                 |
|      | Tumor  | 234,044,094 | 192,369,656                    | 82.19                        | 101,280,384                      | 43.27                          | 20,767,778                  | 188.17             | 99.06                                | 96.42                                 |
| B10  | Blood  | 199,017,391 | 148,094,364                    | 74.41                        | 91,504,070                       | 45.98                          | 18,611,532                  | 168.10             | 99.16                                | 96.65                                 |
|      | Tumor  | 246,304,477 | 182,265,248                    | 74.00                        | 119,029,968                      | 48.33                          | 20,677,969                  | 217.19             | 99.12                                | 96.58                                 |
| B13  | Blood  | 79,582,529  | 71,719,028                     | 90.12                        | 46,337,260                       | 58.23                          | 22,227,413                  | 100.78             | 99.14                                | 95.73                                 |
|      | Tumor  | 101,716,803 | 92,657,746                     | 91.09                        | 59,554,240                       | 58.55                          | 26,707,803                  | 125.22             | 99.15                                | 96.39                                 |
| B15  | Blood  | 92,540,238  | 83,748,557                     | 90.50                        | 53,344,953                       | 57.65                          | 19,931,298                  | 114.04             | 99.06                                | 95.53                                 |
|      | Tumor  | 93,409,390  | 84,974,473                     | 90.97                        | 56,416,719                       | 60.40                          | 20,698,459                  | 120.09             | 99.23                                | 96.86                                 |
| B17  | Blood  | 197,778,961 | 139,308,995                    | 70.44                        | 110,341,211                      | 55.79                          | 20,445,729                  | 204.77             | 99.10                                | 96.78                                 |
|      | Tumor  | 231,796,676 | 177,964,858                    | 76.78                        | 114,766,954                      | 49.51                          | 23,496,509                  | 207.26             | 99.53                                | 97.91                                 |
| B20  | Blood  | 211,090,639 | 160,313,236                    | 75.95                        | 94,389,677                       | 44.72                          | 22,620,859                  | 235.56             | 98.87                                | 98.32                                 |
|      | Tumor  | 247,330,198 | 199,826,455                    | 80.79                        | 115,333,478                      | 46.63                          | 23,871,115                  | 221.39             | 99.33                                | 96.86                                 |

\* based on the hg18 UCSC release of the human genome.

**Supplementary Table 3. Details of predicted somatic mutations detected in the Discovery Screen.**

| Gene Symbol | Tumor ID | Nucleotide (genomic)#        | Nucleotide (cDNA)§ | Codon change | Amino acid change | Amino acid (protein)§ | Mutation Type     | Validation status |
|-------------|----------|------------------------------|--------------------|--------------|-------------------|-----------------------|-------------------|-------------------|
| ABCA4       | B8       | g.chr1:94351206C>T           | c.71G>A            | CGC=>CAC     | Arg=>His          | p.R24H                | missense          | genotyping        |
| ABT1        | B2       | g.chr6:26706810C>G           | c.777C>G           | CCC=>CCG     | Pro=>Pro          | p.P259P               | synonymous        | NV                |
| ACAD10      | B5       | g.chr12:110643907G>C         | c.1042G>C          | GAT=>CAT     | Asp=>His          | p.D348H               | missense          | NV                |
| ACO1        | B5       | g.chr9:32440052C>T           | c.2613C>T          | CTC=>CTT     | Leu=>Leu          | p.L871L               | synonymous        | NV                |
| ADAMTSL3    | B5       | g.chr15:82491167C>G          | c.4733C>G          | TCC=>TGC     | Ser=>Cys          | p.S1578C              | missense          | genotyping        |
| ADCY2       | B5       | g.chr5:7762361G>A            | c.1439G>A          | CGC=>CAC     | Arg=>His          | p.R480H               | missense          | genotyping        |
| ALDH1B1     | B15      | g.chr9:38386397G>T           | c.652G>T           | GCC=>TCC     | Ala=>Ser          | p.A218S               | missense          | genotyping        |
| ALDH3A1     | B8       | g.chr17:19587243G>A          | c.288C>T           | GAC=>GAT     | Asp=>Asp          | p.D96D                | synonymous        | NV                |
| ALOX12      | B13      | g.chr17:6842847A>C           | c.509A>C           | AAG=>ACG     | Lys=>Thr          | p.K170T               | missense          | genotyping        |
| ALS2CR11    | B5       | g.chr2:202144928C>T          | c.814G>A           | GAA=>AAA     | Glu=>Lys          | p.E272K               | missense          | genotyping        |
| AMAC1L2     | B15      | g.chr8:11226628G>A           | c.603G>A           | CTG=>CTA     | Leu=>Leu          | p.L201L               | synonymous        | NV                |
| AMAC1L2     | B15      | g.chr8:11226629G>T           | c.604G>T           | GCG=>TCG     | Ala=>Ser          | p.A202S               | missense          | NV                |
| ANK2        | B10      | g.chr4:114494501G>A          | c.5278G>A          | GAA=>AAA     | Glu=>Lys          | p.E1760K              | missense          | genotyping        |
| ANK3        | B10      | g.chr10:61544007G>A          | c.2930C>T          | TCA=>TTA     | Ser=>Leu          | p.S977L               | missense          | genotyping        |
| ANKLE1      | B20      | g.chr19:17255674G>A          | c.1101G>A          | CTG=>CTA     | Leu=>Leu          | p.L367L               | synonymous        | NV                |
| ANKMY2      | B20      | g.chr7:16610882C>G           | c.1000G>C          | GTT=>CTT     | Val=>Leu          | p.V334L               | missense          | NV                |
| ANO5        | B5       | g.chr11:22248513G>A          | c.1978G>A          | GAC=>AAC     | Asp=>Asn          | p.D660N               | missense          | genotyping        |
| ANO7        | B15      | g.chr2:241779331C>A          | c.320C>A           | CCC=>CAC     | Pro=>His          | p.P107H               | missense          | genotyping        |
| ANO7        | B15      | g.chr2:241779332C>A          | c.321C>A           | CCC=>CCA     | Pro=>Pro          | p.P107P               | synonymous        | NV                |
| ANPEP       | B15      | g.chr15:88145685C>T          | c.1727G>A          | CGC=>CAC     | Arg=>His          | p.R576H               | missense          | genotyping        |
| AOAH        | B8       | g.chr7:36546519C>T           | c.1237G>A          | GTT=>ATT     | Val=>Ile          | p.V413I               | missense          | genotyping        |
| AP2B1       | B5       | g.chr17:31001755G>C          | c.1630G>C          | GAG=>CAG     | Glu=>Gln          | p.E544Q               | missense          | genotyping        |
| ARHGAP28    | B10      | g.chr18:6866166G>T           | c.772G>T           | GAA=>TAA     | Glu=>Stop         | p.E258*               | nonsense          | genotyping        |
| ARHGEF18    | B10      | g.chr19:7415121G>C           | c.354G>C           | CGG=>CGC     | Arg=>Arg          | p.R118R               | synonymous        | NV                |
| ARID1A      | B13      | g.chr1:26966872_26966872delC | c.2994_2994 delC   | -            | -                 | -                     | Frame shift indel | Sanger sequencing |
| ARID1A      | B5       | g.chr1:26971940C>G           | c.3590C>G          | TCC=>TGC     | Ser=>Cys          | p.S1197C              | missense          | genotyping        |
| ARID1A      | B5       | g.chr1:26972451C>A           | c.3743C>A          | TCA=>TAA     | Ser=>Stop         | p.S1248*              | nonsense          | genotyping        |
| ARID1A      | B13      | g.chr1:26978951C>G           | c.5975C>G          | TCA=>TGA     | Ser=>Stop         | p.S1992*              | nonsense          | genotyping        |
| ARID1A      | B13      | g.chr1:26979357C>G           | c.6381C>G          | ATC=>ATG     | Ile=>Met          | p.I2127M              | missense          | genotyping        |
| ARID1A      | B13      | g.chr1:26979782C>T           | c.6806C>T          | TCA=>TTA     | Ser=>Leu          | p.S2269L              | missense          | genotyping        |
| ARMC4       | B10      | g.chr10:28316466G>C          | c.237C>G           | GTC=>GTG     | Val=>Val          | p.V79V                | synonymous        | NV                |
| ASB15       | B13      | g.chr7:123056623G>C          | c.1339G>C          | GAC=>CAC     | Asp=>His          | p.D447H               | missense          | genotyping        |
| ASRGL1      | B9       | g.chr11:61880445C>G          | c.263C>G           | TCT=>TGT     | Ser=>Cys          | p.S88C                | missense          | NV                |
| ATG2B       | B5       | g.chr14:95839211C>T          | c.4977G>A          | ATG=>ATA     | Met=>Ile          | p.M1659I              | missense          | genotyping        |
| ATN1        | B13      | g.chr12:6915836C>G           | c.1145C>G          | TCT=>TGT     | Ser=>Cys          | p.S382C               | missense          | NV                |
| ATP4B       | B10      | g.chr13:113355326C>T         | c.418G>A           | GAG=>AAG     | Glu=>Lys          | p.E140K               | missense          | NV                |
| ATP5C1      | B10      | g.chr10:7881856G>A           | c.544G>A           | GAA=>AAA     | Glu=>Lys          | p.E182K               | missense          | genotyping        |
| ATP6AP1L    | B5       | g.chr5:81649710C>T           | c.510C>T           | CTC=>CTT     | Leu=>Leu          | p.L170L               | synonymous        | NV                |
| ATP8A1      | B10      | g.chr4:42312812G>A           | c.404C>T           | ACG=>ATG     | Thr=>Met          | p.T135M               | missense          | genotyping        |
| ATXN2L      | B15      | g.chr16:28754797C>T          | c.2938C>T          | CCT=>TCT     | Pro=>Ser          | p.P980S               | missense          | NV                |
| AVL9        | B10      | g.chr7:32565266G>A           | c.880G>A           | GAG=>AAG     | Glu=>Lys          | p.E294K               | missense          | genotyping        |
| BAI3        | B15      | g.chr6:70155325G>A           | c.4390G>A          | GCA=>ACA     | Ala=>Thr          | p.A1464T              | missense          | genotyping        |
| BCL9L       | B5       | g.chr11:118284280G>C         | c.321C>G           | CTC=>CTG     | Leu=>Leu          | p.L107L               | synonymous        | NV                |
| BPTF        | B10      | g.chr17:63370923A>C          | c.7051A>C          | ACC=>CCC     | Thr=>Pro          | p.T2351P              | missense          | NV                |
| BRIP1       | B8       | g.chr17:57231267C>T          | c.1316G>A          | CGA=>CAA     | Arg=>Gln          | p.R439Q               | missense          | genotyping        |
| BRPF1       | B10      | g.chr3:9761820G>A            | c.3049G>A          | GCT=>ACT     | Ala=>Thr          | p.A1017T              | missense          | genotyping        |
| BRPF3       | B20      | g.chr6:36280519C>G           | c.1555C>G          | CTT=>GTT     | Leu=>Val          | p.L519V               | missense          | NV                |
| BTAFA1      | B5       | g.chr10:93706392G>A          | c.829G>A           | GAG=>AAG     | Glu=>Lys          | p.E277K               | missense          | NV                |
| BTAFA1      | B10      | g.chr10:93768659C>G          | c.4850C>G          | TCA=>TGA     | Ser=>Stop         | p.S1617*              | nonsense          | genotyping        |
| BTBD16      | B13      | g.chr10:124079042C>G         | c.969C>G           | CTC=>CTG     | Leu=>Leu          | p.L323L               | synonymous        | NV                |

**Supplementary Table 3 continued. Details of predicted somatic mutations detected in the Discovery Screen.**

| Gene Symbol | Tumor ID | Nucleotide (genomic)#                        | Nucleotide (cDNA)\$              | Codon change | Amino acid change | Amino acid (protein)§ | Mutation Type     | Validation status |
|-------------|----------|----------------------------------------------|----------------------------------|--------------|-------------------|-----------------------|-------------------|-------------------|
| C10orf137   | B5       | g.chr10:127414386A>T                         | c.1579A>T                        | AGC=>TGC     | Ser=>Cys          | p.S527C               | missense          | genotyping        |
| C14orf101   | B15      | g.chr14:56155131G>A                          | c.1123G>A                        | GTT=>ATT     | Val=>Ile          | p.V375I               | missense          | genotyping        |
| C15orf55    | B17      | g.chr15:32428089G>A                          | c.644G>A                         | CGT=>CAT     | Arg=>His          | p.R215H               | missense          | NV                |
| C17orf80    | B15      | g.chr17:68743656C>G                          | c.440C>G                         | TCT=>TGT     | Ser=>Cys          | p.S147C               | missense          | genotyping        |
| C19orf15    | B10      | g.chr19:43542984G>A                          | c.544G>A                         | GAG=>AAG     | Glu=>Lys          | p.E182K               | missense          | genotyping        |
| C1orf101    | B5       | g.chr1:242821652G>C                          | c.2185G>C                        | GAA=>CAA     | Glu=>Gln          | p.E729Q               | missense          | genotyping        |
| C1orf106    | B10      | g.chr1:199143599G>T                          | c.790G>T                         | GAT=>TAT     | Asp=>Tyr          | p.D264Y               | missense          | NV                |
| C1orf54     | B20      | g.chr1:148513119G>C                          | c.52G>C                          | GAA=>CAA     | Glu=>Gln          | p.E18Q                | missense          | NV                |
| C20orf27    | B5       | g.chr20:3687245C>A                           | c.175G>T                         | GAG=>TAG     | Glu=>Stop         | p.E59*                | nonsense          | NV                |
| C20orf46    | B5       | g.chr20:1109857G>A                           | c.406C>T                         | CTG=>TTG     | Leu=>Leu          | p.L136L               | synonymous        | NV                |
| C20orf72    | B2       | g.chr20:17918682T>G                          | c.965T>G                         | CTT=>CGT     | Leu=>Arg          | p.L322R               | missense          | NV                |
| C4orf17     | B9       | g.chr4:100662853C>G                          | c.301C>G                         | CCA=>GCA     | Pro=>Ala          | p.P101A               | missense          | genotyping        |
| C4orf21     | B2       | g.chr4:113758535T>C                          | c.2112A>G                        | CTA=>CTG     | Leu=>Leu          | p.L704L               | synonymous        | NV                |
| C8orf55     | B2       | g.chr8:143813851G>A                          | c.619G>A                         | GAC=>AAC     | Asp=>Asn          | p.D207N               | missense          | NV                |
| C8orf76     | B20      | g.chr8:124322731C>T                          | c.37G>A                          | GAG=>AAG     | Glu=>Lys          | p.E13K                | missense          | NV                |
| C9orf102    | B15      | g.chr9:97717875G>A                           | c.926G>A                         | GGC=>GAC     | Gly=>Asp          | p.G309D               | missense          | genotyping        |
| CA9         | B20      | g.chr9:35664191_35664208delGGAGAGGATCTACCT   | c.236_253delIGGAGAGGAGGATCTACTCT | -            | -                 | -                     | indel             | NV                |
| CANX        | B8       | g.chr5:179082462G>C                          | c.1234G>C                        | GAA=>CAA     | Glu=>Gln          | p.E412Q               | missense          | genotyping        |
| CCDC111     | B5       | g.chr4:185843642A>T                          | c.1182A>T                        | AAA=>AAT     | Lys=>Asn          | p.K394N               | missense          | genotyping        |
| CD163L1     | B10      | g.chr12:7418513C>T                           | c.3201G>A                        | CTG=>CTA     | Leu=>Leu          | p.L1067L              | synonymous        | NV                |
| CD163L1     | B8       | g.chr12:7419397G>A                           | c.2748C>T                        | AAC=>AAT     | Asn=>Asn          | p.N916N               | synonymous        | NV                |
| CD1C        | B8       | g.chr1:156529060C>G                          | c.661C>G                         | CTG=>GTG     | Leu=>Val          | p.L221V               | missense          | genotyping        |
| CD86        | B10      | g.chr3:123321057G>A                          | c.976G>A                         | GAT=>AAT     | Asp=>Asn          | p.D326N               | missense          | genotyping        |
| CDH5        | B8       | g.chr16:64978229G>C                          | c.227G>C                         | AGT=>ACT     | Ser=>Thr          | p.S76T                | missense          | genotyping        |
| CDKN1A      | B2       | g.chr6:36759900_36759916delGCAAGGCCCTGCCCGCC | c.45_61delGCAAGGCCCTGCCCGCCGC    | -            | -                 | -                     | Frame shift indel | NV                |
| CDKN1A      | B15      | g.chr6:36760002G>A                           | c.146G>A                         | TGG=>TAG     | Trp=>Stop         | p.W49*                | nonsense          | genotyping        |
| CDKN1A      | B13      | g.chr6:36760042insT                          | c.186insT                        | -            | -                 | -                     | Frame shift indel | Sanger sequencing |
| CEP135      | B9       | g.chr4:56541102G>C                           | c.1510G>C                        | GAA=>CAA     | Glu=>Gln          | p.E504Q               | missense          | genotyping        |
| CEP192      | B15      | g.chr18:13089550G>A                          | c.4845G>A                        | TTG=>TTA     | Leu=>Leu          | p.L1615L              | synonymous        | NV                |
| CHD6        | B20      | g.chr20:39595594G>T                          | c.63C>A                          | TCC=>TCA     | Ser=>Ser          | p.S21S                | synonymous        | NV                |
| CHRD        | B13      | g.chr3:185583853G>A                          | c.1273G>A                        | GGC=>AGC     | Gly=>Ser          | p.G425S               | missense          | genotyping        |
| CLSPN       | B15      | g.chr1:35986760C>G                           | c.2305G>C                        | GAG=>CAG     | Glu=>Gln          | p.E769Q               | missense          | genotyping        |
| CNTN4       | B20      | g.chr3:3072855C>T                            | c.3032C>T                        | TCA=>TTA     | Ser=>Leu          | p.S1011L              | missense          | NV                |
| CNTNAP2     | B8       | g.chr7:146460373C>T                          | c.1187C>T                        | TCA=>TTA     | Ser=>Leu          | p.S396L               | missense          | genotyping        |
| COBL        | B9       | g.chr7:51064103G>A                           | c.2184C>T                        | ACC=>ACT     | Thr=>Thr          | p.T728T               | synonymous        | NV                |
| COL3A1      | B10      | g.chr2:189583277G>T                          | c.3952G>T                        | GAT=>TAT     | Asp=>Tyr          | p.D1318Y              | missense          | genotyping        |
| COL3A1      | B10      | g.chr2:189583646G>A                          | c.4039G>A                        | GAA=>AAA     | Glu=>Lys          | p.E1347K              | missense          | genotyping        |
| COL7A1      | B8       | g.chr3:48606028G>C                           | c.372C>G                         | CTC=>CTG     | Leu=>Leu          | p.L124L               | synonymous        | NV                |
| CPA4        | B8       | g.chr7:129737984C>T                          | c.915C>T                         | ATC=>ATT     | Ile=>Ile          | p.I305I               | synonymous        | NV                |
| CREB3L2     | B20      | g.chr7:137217876G>A                          | c.1309C>T                        | CCC=>TCC     | Pro=>Ser          | p.P437S               | missense          | NV                |
| CREBBP      | B13      | g.chr16:3735319G>A                           | c.3874C>T                        | CAG=>TAG     | Gln=>Stop         | p.Q1292*              | nonsense          | genotyping        |
| CREBBP      | B5       | g.chr16:3783541G>A                           | c.1063C>T                        | CAG=>TAG     | Gln=>Stop         | p.Q355*               | nonsense          | genotyping        |
| CRNKL1      | B10      | g.chr20:19968414C>G                          | c.1867G>C                        | GAC=>CAC     | Asp=>His          | p.D623H               | missense          | genotyping        |
| CRYBA4      | B2       | g.chr22:25356390G>A                          | c.530G>A                         | CGG=>CAG     | Arg=>Gln          | p.R177Q               | missense          | NV                |
| CST1        | B10      | g.chr20:23679392C>T                          | c.112G>A                         | GAC=>AAC     | Asp=>Asn          | p.D38N                | missense          | NV                |
| CUBN        | B8       | g.chr10:16997052C>T                          | c.7336G>A                        | GAA=>AAA     | Glu=>Lys          | p.E2446K              | missense          | genotyping        |
| CUX1        | B15      | g.chr7:101631942G>T                          | c.2645G>T                        | TGG=>TTG     | Trp=>Leu          | p.W882L               | missense          | NV                |
| CUX1        | B15      | g.chr7:101631943G>T                          | c.2646G>T                        | TGG=>TGT     | Trp=>Cys          | p.W882C               | missense          | NV                |
| CYP1A1      | B10      | g.chr15:72802398G>C                          | c.94C>G                          | CAG=>GAG     | Gln=>Glu          | p.Q32E                | missense          | genotyping        |
| CYTSB       | B5       | g.chr17:20049276A>T                          | c.1322A>T                        | GAG=>GTG     | Glu=>Val          | p.E441V               | missense          | genotyping        |



**Supplementary Table 3 continued. Details of predicted somatic mutations detected in the Discovery Screen.**

| Gene Symbol | Tumor ID | Nucleotide (genomic)#                    | Nucleotide (cDNA)\$     | Codon change | Amino acid change | Amino acid (protein)§ | Mutation Type     | Validation status |
|-------------|----------|------------------------------------------|-------------------------|--------------|-------------------|-----------------------|-------------------|-------------------|
| DCHS2       | B10      | g.chr4:155375824A>G                      | c.8065T>C               | TGC=>CGC     | Cys=>Arg          | p.C2689R              | missense          | NV                |
| DCST1       | B20      | g.chr1:153280691G>C                      | c.726G>C                | CTG=>CTC     | Leu=>Leu          | p.L242L               | synonymous        | NV                |
| DDRKG1      | B5       | g.chr20:3131972C>A                       | c.182G>T                | GGA=>GTA     | Gly=>Val          | p.G61V                | missense          | genotyping        |
| DGKH        | B13      | g.chr13:41687733C>G                      | c.3143C>G               | ACT=>AGT     | Thr=>Ser          | p.T1048S              | missense          | genotyping        |
| DIP2C       | B15      | g.chr10:400450C>A                        | c.2341G>T               | GTG=>TTG     | Val=>Leu          | p.V781L               | missense          | genotyping        |
| DISP1       | B10      | g.chr1:221243646G>C                      | c.2284G>C               | GAG=>CAG     | Glu=>Gln          | p.E762Q               | missense          | genotyping        |
| DMD         | B15      | g.chrX:31657672G>A                       | c.277C>T                | CGA=>TGA     | Arg=>Stop         | p.R93*                | nonsense          | genotyping        |
| DNAH17      | B10      | g.chr17:74077150C>T                      | c.205G>A                | GAG=>AAG     | Glu=>Lys          | p.E69K                | missense          | genotyping        |
| DNAJC27     | B2       | g.chr2:25024110T>C                       | c.701A>G                | AAT=>AGT     | Asn=>Ser          | p.N234S               | missense          | NV                |
| DNMT1       | B2       | g.chr19:10135020C>T                      | c.860G>A                | AGA=>AAA     | Arg=>Lys          | p.R287K               | missense          | NV                |
| DOCK8       | B5       | g.chr9:423939A>T                         | c.464A>T                | CAG=>CTG     | Gln=>Leu          | p.Q1549L              | missense          | genotyping        |
| EGLN1       | B15      | g.chr1:229623649G>A                      | c.609C>T                | AAC=>AAT     | Asn=>Asn          | p.N203N               | synonymous        | NV                |
| EIF2C4      | B17      | g.chr1:36072243G>A                       | c.1445G>A               | TGT=>TAT     | Cys=>Tyr          | p.C482Y               | missense          | NV                |
| EMILIN2     | B15      | g.chr18:2882023G>C                       | c.1898G>C               | AGA=>ACA     | Arg=>Thr          | p.R633T               | missense          | NV                |
| ENO2        | B10      | g.chr12:6899092T>C                       | c.769T>C                | TAT=>CAT     | Tyr=>His          | p.Y257H               | missense          | genotyping        |
| EP300       | B10      | g.chr22:39875951C>T                      | c.2620C>T               | CAG=>TAG     | Gln=>Stop         | p.Q874*               | nonsense          | genotyping        |
| EPDR1       | B13      | g.chr7:37926788_37926800delAGGCAGTGGCAGC | c.83_95delAGGCAGTGGCAGC | -            | -                 | -                     | Frame shift indel | NV                |
| ERBB3       | B9       | g.chr12:54765214C>T                      | c.403C>T                | CGC=>TGC     | Arg=>Cys          | p.R135C               | missense          | genotyping        |
| ERBB3       | B5       | g.chr12:54768804G>A                      | c.994G>A                | GAG=>AAG     | Glu=>Lys          | p.E332K               | missense          | genotyping        |
| ERBB3       | B8       | g.chr12:54774492G>T                      | c.1744G>T               | GGG=>TGG     | Gly=>Trp          | p.G582W               | missense          | genotyping        |
| ERN2        | B5       | g.chr16:23629351T>C                      | c.364A>G                | ATG=>GTG     | Met=>Val          | p.M122V               | missense          | NV                |
| ESPL1       | B8       | g.chr12:51949441C>G                      | c.448C>G                | CTG=>GTG     | Leu=>Val          | p.L150V               | missense          | genotyping        |
| ESPNP       | B13      | g.chr1:16907043_16907050delGCGCGCGT      | c.313_320delGCGCGCGT    | -            | -                 | -                     | Frame shift indel | NV                |
| EXOSC9      | B2       | g.chr4:122953975C>T                      | c.964C>T                | CCT=>TCT     | Pro=>Ser          | p.P322S               | missense          | NV                |
| FAH         | B5       | g.chr15:78254484G>A                      | c.909G>A                | CTG=>CTA     | Leu=>Leu          | p.L303L               | synonymous        | NV                |
| FARP2       | B8       | g.chr2:242051542G>A                      | c.1797G>A               | CAG=>CAA     | Gln=>Gln          | p.Q599Q               | synonymous        | NV                |
| FASTKD5     | B8       | g.chr20:3076441G>A                       | c.1276C>T               | CGA=>TGA     | Arg=>Stop         | p.R426*               | nonsense          | NV                |
| FBXL3       | B17      | g.chr13:76487661G>A                      | c.527C>T                | TCG=>TTG     | Ser=>Leu          | p.S176L               | missense          | NV                |
| FFAR2       | B5       | g.chr19:40633118T>A                      | c.662T>A                | GTG=>GAG     | Val=>Glu          | p.V221E               | missense          | NV                |
| FLNB        | B5       | g.chr3:58039558G>A                       | c.616G>A                | GAT=>AAT     | Asp=>Asn          | p.D206N               | missense          | genotyping        |
| FMNL1       | B17      | g.chr17:40674756G>C                      | c.1557G>C               | CCG=>CCC     | Pro=>Pro          | p.P519P               | synonymous        | NV                |
| FRMPD1      | B17      | g.chr9:37736463insATGG                   | c.303insATGG            | -            | -                 | -                     | Frame shift indel | NV                |
| FURIN       | B2       | g.chr15:89225914C>T                      | c.2187C>T               | TTC=>TTT     | Phe=>Phe          | p.F729F               | synonymous        | NV                |
| GALM        | B5       | g.chr2:38746996A>T                       | c.189A>T                | GAA=>GAT     | Glu=>Asp          | p.E63D                | missense          | genotyping        |
| GALNT13     | B9       | g.chr2:154806836T>C                      | c.359T>C                | GTC=>GCC     | Val=>Ala          | p.V120A               | missense          | genotyping        |
| GART        | B15      | g.chr21:33816453C>G                      | c.1305G>C               | TTG=>TTC     | Leu=>Phe          | p.L435F               | missense          | genotyping        |
| GATC        | B15      | g.chr12:119379305G>A                     | c.298G>A                | GCT=>ACT     | Ala=>Thr          | p.A100T               | missense          | genotyping        |
| GATC        | B15      | g.chr12:119379306C>T                     | c.299C>T                | GCT=>GTT     | Ala=>Val          | p.A100V               | missense          | genotyping        |
| GCLM        | B8       | g.chr1:94127238C>A                       | c.721G>T                | GAG=>TAG     | Glu=>Stop         | p.E241*               | nonsense          | genotyping        |
| GCNT3       | B17      | g.chr15:57697812_57697818delAACTTTC      | c.84_90delAACTTTC       | -            | -                 | -                     | Frame shift indel | NV                |
| GHRHR       | B9       | g.chr7:30982594C>G                       | c.1000C>G               | CTG=>GTG     | Leu=>Val          | p.L334V               | missense          | genotyping        |
| GKN2        | B15      | g.chr2:69027849G>C                       | c.249C>G                | ATC=>ATG     | Ile=>Met          | p.I83M                | missense          | genotyping        |
| GLDC        | B10      | g.chr9:6592171G>C                        | c.1093C>G               | CTT=>GTT     | Leu=>Val          | p.L365V               | missense          | genotyping        |
| GLRA3       | B15      | g.chr4:175801538C>G                      | c.1324G>C               | GAG=>CAG     | Glu=>Gln          | p.E442Q               | missense          | genotyping        |
| GNA13       | B10      | g.chr17:60441372C>T                      | c.599G>A                | AGA=>AAA     | Arg=>Lys          | p.R200K               | missense          | genotyping        |
| GNA14       | B9       | g.chr9:79236161G>A                       | c.489C>T                | ATC=>ATT     | Ile=>Ile          | p.I163I               | synonymous        | NV                |
| GNL2        | B9       | g.chr1:37807229C>G                       | c.1678G>C               | GAG=>CAG     | Glu=>Gln          | p.E560Q               | missense          | NV                |
| GON4L       | B5       | g.chr1:154052272G>A                      | c.1109C>T               | TCA=>TTA     | Ser=>Leu          | p.S370L               | missense          | genotyping        |
| GPR114      | B2       | g.chr16:56153869C>T                      | c.137C>T                | TCT=>TTT     | Ser=>Phe          | p.S46F                | missense          | NV                |
| GPR158      | B15      | g.chr10:25901606C>T                      | c.1537C>T               | CGA=>TGA     | Arg=>Stop         | p.R513*               | nonsense          | NV                |
| GPR182      | B10      | g.chr12:55675448T>C                      | c.188T>C                | ATG=>ACG     | Met=>Thr          | p.M63T                | missense          | genotyping        |
| GPR32       | B10      | g.chr19:55966290A>T                      | c.621A>T                | GAA=>GAT     | Glu=>Asp          | p.E207D               | missense          | NV                |

**Supplementary Table 3 continued. Details of predicted somatic mutations detected in the Discovery Screen.**

| Gene Symbol | Tumor ID | Nucleotide (genomic)#                | Nucleotide (cDNA)\$  | Codon change | Amino acid change | Amino acid (protein)§ | Mutation Type     | Validation status |
|-------------|----------|--------------------------------------|----------------------|--------------|-------------------|-----------------------|-------------------|-------------------|
| GPR34       | B2       | g.chrX:41440309T>C                   | c.479T>C             | ATA=>ACA     | Ile=>Thr          | p.I160T               | missense          | NV                |
| GPR64       | B17      | g.chrX:18934281T>G                   | c.1647A>C            | GTA=>GTC     | Val=>Val          | p.V549V               | synonymous        | NV                |
| GRIA4       | B2       | g.chr11:10535574G>C                  | c.2607G>C            | GAG=>GAC     | Glu=>Asp          | p.E869D               | missense          | NV                |
| GRIN2B      | B15      | g.chr12:13797804C>T                  | c.724G>A             | GAA=>AAA     | Glu=>Lys          | p.E242K               | missense          | genotyping        |
| GRK4        | B10      | g.chr4:2993973C>T                    | c.967C>T             | CGT=>TGT     | Arg=>Cys          | p.R323C               | missense          | genotyping        |
| GRM5        | B5       | g.chr11:88420278G>A                  | c.411C>T             | TTC=>TTT     | Phe=>Phe          | p.F137F               | synonymous        | NV                |
| GRM8        | B8       | g.chr7:126331895A>T                  | c.806T>A             | CTG=>CAG     | Leu=>Gln          | p.L269Q               | missense          | genotyping        |
| GRXCR2      | B5       | g.chr5:145232654G>A                  | c.71C>T              | TCC=>TTC     | Ser=>Phe          | p.S24F                | missense          | genotyping        |
| GSG1        | B15      | g.chr12:13135015T>C                  | c.14A>G              | GAG=>GGG     | Glu=>Gly          | p.E5G                 | missense          | genotyping        |
| GSR         | B8       | g.chr8:30673482G>C                   | c.752C>G             | TCA=>TGA     | Ser=>Stop         | p.S251*               | nonsense          | genotyping        |
| HDAC4       | B9       | g.chr2:239750456G>A                  | c.591C>T             | AGC=>AGT     | Ser=>Ser          | p.S197S               | synonymous        | NV                |
| HDC         | B13      | g.chr15:48333721C>T                  | c.618G>A             | GTG=>GTA     | Val=>Val          | p.V206V               | synonymous        | NV                |
| HEATR3      | B9       | g.chr16:48670257G>A                  | c.610G>A             | GAA=>AAA     | Glu=>Lys          | p.E204K               | missense          | NV                |
| HEXA        | B9       | g.chr15:70433127C>G                  | c.418G>C             | GAG=>CAG     | Glu=>Gln          | p.E140Q               | missense          | genotyping        |
| HMCN1       | B13      | g.chr1:184158191C>T                  | c.958C>T             | CGA=>TGA     | Arg=>Stop         | p.R320*               | nonsense          | genotyping        |
| HMGXB4      | B15      | g.chr22:33991035G>A                  | c.654G>A             | GCG=>GCA     | Ala=>Ala          | p.A218A               | synonymous        | NV                |
| HOXB8       | B15      | g.chr17:44046973_44046981delGTCTGGGC | c.94_102delGTCTGGGC  | -            | -                 | -                     | indel             | NV                |
| HOXC5       | B8       | g.chr12:52714459T>C                  | c.585T>C             | AAT=>AAC     | Asn=>Asn          | p.N195N               | synonymous        | NV                |
| HRAS        | B15      | g.chr11:524288C>T                    | c.35G>A              | GGC=>GAC     | Gly=>Asp          | p.G12D                | missense          | NV                |
| HS3ST3A1    | B8       | g.chr17:13340848G>T                  | c.612C>A             | CCC=>CCA     | Pro=>Pro          | p.P204P               | synonymous        | NV                |
| HSD17B4     | B20      | g.chr5:118842597C>G                  | c.604C>G             | CAG=>GAG     | Gln=>Glu          | p.Q202E               | missense          | NV                |
| HSD17B6     | B5       | g.chr12:55464914C>T                  | c.583C>T             | CAA=>TAA     | Gln=>Stop         | p.Q195*               | nonsense          | genotyping        |
| HSPA4L      | B20      | g.chr4:128967952G>C                  | c.2089G>C            | GAG=>CAG     | Glu=>Gln          | p.E697Q               | missense          | NV                |
| HSPG2       | B17      | g.chr1:22058700T>G                   | c.5239A>C            | ACC=>CCC     | Thr=>Pro          | p.T1747P              | missense          | genotyping        |
| HSPH1       | B8       | g.chr13:30609517G>C                  | c.2515C>G            | CCA=>GCA     | Pro=>Ala          | p.P839A               | missense          | NV                |
| IFT57       | B10      | g.chr3:109364126C>G                  | c.1178G>C            | AGA=>ACA     | Arg=>Thr          | p.R393T               | missense          | genotyping        |
| IFT57       | B13      | g.chr3:109423788C>A                  | c.72G>T              | GGG=>GGT     | Gly=>Gly          | p.G24G                | synonymous        | NV                |
| IGSF6       | B5       | g.chr16:21566053G>A                  | c.329C>T             | TCA=>TTA     | Ser=>Leu          | p.S110L               | missense          | NV                |
| IL18RAP     | B15      | g.chr2:102406237C>A                  | c.68C>A              | TCA=>TAA     | Ser=>Stop         | p.S23*                | nonsense          | genotyping        |
| IL32        | B2       | g.chr16:3059298insG                  | c.59insG             | -            | -                 | -                     | Frame shift indel | NV                |
| INTU        | B9       | g.chr4:128828353C>T                  | c.1330C>T            | CAG=>TAG     | Gln=>Stop         | p.Q444*               | nonsense          | NV                |
| IQGAP1      | B5       | g.chr15:88797091G>A                  | c.1243G>A            | GAA=>AAA     | Glu=>Lys          | p.E415K               | missense          | genotyping        |
| IQSEC3      | B5       | g.chr12:117874G>A                    | c.175G>A             | GAG=>AAG     | Glu=>Lys          | p.E59K                | missense          | genotyping        |
| IREB2       | B10      | g.chr15:76570091G>A                  | c.2257G>A            | GAT=>AAT     | Asp=>Asn          | p.D753N               | missense          | genotyping        |
| IRF1        | B13      | g.chr5:131848006G>A                  | c.800C>T             | TCT=>TTT     | Ser=>Phe          | p.S267F               | missense          | genotyping        |
| IRF2        | B10      | g.chr4:185587176C>G                  | c.37G>C              | GAG=>CAG     | Glu=>Gln          | p.E13Q                | missense          | genotyping        |
| IRF8        | B13      | g.chr16:84512318C>T                  | c.1210C>T            | CGG=>TGG     | Arg=>Trp          | p.R404W               | missense          | NV                |
| KANK2       | B10      | g.chr19:11148353G>A                  | c.1661C>T            | GCG=>GTG     | Ala=>Val          | p.A554V               | missense          | NV                |
| KANK3       | B2       | g.chr19:8295374G>C                   | c.2341C>G            | CTG=>GTG     | Leu=>Val          | p.L781V               | missense          | NV                |
| KATNAL1     | B2       | g.chr13:29755844G>A                  | c.71C>T              | TCA=>TTA     | Ser=>Leu          | p.S24L                | missense          | NV                |
| KBTBD4      | B10      | g.chr11:47555894C>T                  | c.234G>A             | CTG=>CTA     | Leu=>Leu          | p.L78L                | synonymous        | NV                |
| KBTBD4      | B10      | g.chr11:47556004C>A                  | c.124G>T             | GAG=>TAG     | Glu=>Stop         | p.E42*                | nonsense          | genotyping        |
| KCNMA1      | B9       | g.chr10:78681000G>A                  | c.561C>T             | CTC=>CTT     | Leu=>Leu          | p.L187L               | synonymous        | NV                |
| KCTD7       | B15      | g.chr7:65741631G>C                   | c.847G>C             | GAG=>CAG     | Glu=>Gln          | p.E283Q               | missense          | genotyping        |
| KIAA0141    | B13      | g.chr5:141294310A>G                  | c.1124A>G            | TAT=>TGT     | Tyr=>Cys          | p.Y375C               | missense          | genotyping        |
| KIAA0556    | B9       | g.chr16:27668406_27668410delAAAGAC   | c.2235_2239delAAAGAC | -            | -                 | -                     | Frame shift indel | Sanger sequencing |
| KIAA1199    | B5       | g.chr15:79017240C>A                  | c.3272C>A            | TCC=>TAC     | Ser=>Tyr          | p.S1091Y              | missense          | genotyping        |
| KIAA1199    | B5       | g.chr15:79017311C>T                  | c.3343C>T            | CAG=>TAG     | Gln=>Stop         | p.Q1115*              | nonsense          | genotyping        |
| KIAA1377    | B10      | g.chr11:101338015G>A                 | c.1039G>A            | GAA=>AAA     | Glu=>Lys          | p.E347K               | missense          | NV                |
| KIAA1529    | B8       | g.chr9:99120611G>A                   | c.1554G>A            | ACG=>ACA     | Thr=>Thr          | p.T518T               | synonymous        | NV                |
| KIF15       | B5       | g.chr3:44810900A>G                   | c.827A>G             | CAT=>CGT     | His=>Arg          | p.H276R               | missense          | genotyping        |
| KIFAP3      | B8       | g.chr1:168274082C>G                  | c.490G>C             | GAT=>CAT     | Asp=>His          | p.D164H               | missense          | NV                |

**Supplementary Table 3 continued. Details of predicted somatic mutations detected in the Discovery Screen.**

| Gene Symbol | Tumor ID | Nucleotide (genomic)#                                            | Nucleotide (cDNA)\$                                        | Codon change | Amino acid change | Amino acid (protein)§ | Mutation Type        | Validation status    |
|-------------|----------|------------------------------------------------------------------|------------------------------------------------------------|--------------|-------------------|-----------------------|----------------------|----------------------|
| KLC2        | B5       | g.chr11:65786019C>T                                              | c.459C>T                                                   | AAC=>AAT     | Asn=>Asn          | p.N153N               | synonymous           | NV                   |
| KLC4        | B15      | g.chr6:43148598G>A                                               | c.1601G>A                                                  | AGA=>AAA     | Arg=>Lys          | p.R534K               | missense             | genotyping           |
| KLC4        | B15      | g.chr6:43148639G>C                                               | c.1642G>C                                                  | GAG=>CAG     | Glu=>Gln          | p.E548Q               | missense             | genotyping           |
| KLC4        | B15      | g.chr6:43148643G>A                                               | c.1646G>A                                                  | GGA=>GAA     | Gly=>Glu          | p.G549E               | missense             | genotyping           |
| KRAS        | B5       | g.chr12:25271543T>A                                              | c.182A>T                                                   | CAA=>CTA     | Gln=>Leu          | p.Q61L                | missense             | NV                   |
| KRAS        | B13      | g.chr12:25271544G>T                                              | c.181C>A                                                   | CAA=>AAA     | Gln=>Lys          | p.Q61K                | missense             | genotyping           |
| KRAS        | B13      | g.chr12:25271545A>T                                              | c.180T>A                                                   | GGT=>GGA     | Gly=>Gly          | p.G60G                | synonymous           | NV                   |
| KRT33A      | B5       | g.chr17:36759142G>A                                              | c.413C>T                                                   | TCA=>TTA     | Ser=>Leu          | p.S138L               | missense             | genotyping           |
| KRTAP5-5    | B20      | g.chr11:1608190_1608219delTACTGCTGCCA<br>GTCCAGCTGCTGTA<br>AGCCC | c.171_200del<br>TACTGCTGC<br>CAGTCCAG<br>CTGCTGTA<br>AGCCC | -            | -                 | -                     | indel                | NV                   |
| LAMA2       | B9       | g.chr6:129461023G>A                                              | c.409G>A                                                   | GCG=>ACG     | Ala=>Thr          | p.A137T               | missense             | NV                   |
| LAMA4       | B8       | g.chr6:112619550C>A                                              | c.699G>T                                                   | AGG=>AGT     | Arg=>Ser          | p.R233S               | missense             | genotyping           |
| LAMP2       | B8       | g.chrX:119466885G>A                                              | c.524C>T                                                   | GCT=>GTT     | Ala=>Val          | p.A175V               | missense             | genotyping           |
| LARP5       | B10      | g.chr10:880956C>A                                                | c.470G>T                                                   | CGA=>CTA     | Arg=>Leu          | p.R157L               | missense             | genotyping           |
| LEPRE1      | B2       | g.chr1:42990832G>C                                               | c.1436C>G                                                  | TCT=>TGT     | Ser=>Cys          | p.S479C               | missense             | NV                   |
| LGSN        | B10      | g.chr6:64053587G>T                                               | c.194C>A                                                   | ACC=>AAC     | Thr=>Asn          | p.T65N                | missense             | genotyping           |
| LMBRD2      | B8       | g.chr5:36144470C>G                                               | c.1820G>C                                                  | AGA=>ACA     | Arg=>Thr          | p.R607T               | missense             | NV                   |
| LNX1        | B10      | g.chr4:54037836A>G                                               | c.1445T>C                                                  | TTG=>TCG     | Leu=>Ser          | p.L482S               | missense             | genotyping           |
| LNX1        | B15      | g.chr4:54039588C>T                                               | c.1276G>A                                                  | GTC=>ATC     | Val=>Ile          | p.V426I               | missense             | genotyping           |
| LOXL2       | B10      | g.chr8:23273640C>T                                               | c.439G>A                                                   | GAC=>AAC     | Asp=>Asn          | p.D147N               | missense             | genotyping           |
| LRP2        | B10      | g.chr2:169842550C>T                                              | c.1723G>A                                                  | GAC=>AAC     | Asp=>Asn          | p.D575N               | missense             | genotyping           |
| LZTS1       | B2       | g.chr8:20154753C>G                                               | c.969G>C                                                   | AAG=>AAC     | Lys=>Asn          | p.K323N               | missense             | NV                   |
| MADD        | B13      | g.chr11:47261041G>A                                              | c.1807G>A                                                  | GAG=>AAG     | Glu=>Lys          | p.E603K               | missense             | NV                   |
| MAGEB18     | B13      | g.chrX:26067379insTG                                             | c.356insTG                                                 | -            | -                 | -                     | Frame shift<br>indel | NV                   |
| MAP3K5      | B10      | g.chr6:137013859C>T                                              | c.1744G>A                                                  | GAG=>AAG     | Glu=>Lys          | p.E582K               | missense             | genotyping           |
| MCM3        | B8       | g.chr6:52251543C>T                                               | c.835G>A                                                   | GAG=>AAG     | Glu=>Lys          | p.E279K               | missense             | genotyping           |
| MED1        | B9       | g.chr17:34819982G>A                                              | c.2018C>T                                                  | TCC=>TTC     | Ser=>Phe          | p.S673F               | missense             | genotyping           |
| MED7        | B2       | g.chr5:156498561G>A                                              | c.460C>T                                                   | CAA=>TAA     | Gln=>Stop         | p.Q154*               | nonsense             | NV                   |
| MERTK       | B10      | g.chr2:112482440C>G                                              | c.1877C>G                                                  | TCT=>TGT     | Ser=>Cys          | p.S626C               | missense             | genotyping           |
| METTL10     | B10      | g.chr10:126467636A>G                                             | c.257T>C                                                   | ATT=>ACT     | Ile=>Thr          | p.I86T                | missense             | genotyping           |
| MITF        | B9       | g.chr3:70071016T>A                                               | c.339T>A                                                   | TGT=>TGA     | Cys=>Stop         | p.C113*               | nonsense             | genotyping           |
| MLH1        | B15      | g.chr3:37042462G>C                                               | c.1369G>C                                                  | GAA=>CAA     | Glu=>Gln          | p.E457Q               | missense             | genotyping           |
| MLL         | B9       | g.chr11:117864643C>A                                             | c.4437C>A                                                  | TGC=>TGA     | Cys=>Stop         | p.C1479*              | nonsense             | NV                   |
| MLL2        | B15      | g.chr12:47712976G>A                                              | c.11779C>T                                                 | CAG=>TAG     | Gln=>Stop         | p.Q3927*              | nonsense             | NV                   |
| MLL3        | B5       | g.chr7:151510591G>A                                              | c.5287C>T                                                  | CAG=>TAG     | Gln=>Stop         | p.Q1763*              | nonsense             | genotyping           |
| MLL3        | B5       | g.chr7:151531025_151531025delC                                   | c.4020_4020delC                                            | -            | -                 | -                     | Frame shift<br>indel | Sanger<br>sequencing |
| MLL3        | B20      | g.chr7:151557958A>G                                              | c.2959T>C                                                  | TAC=>CAC     | Tyr=>His          | p.Y987H               | missense             | NV                   |
| MMAB        | B10      | g.chr12:108491010C>T                                             | c.238G>A                                                   | GAC=>AAC     | Asp=>Asn          | p.D80N                | missense             | genotyping           |
| MOBK12C     | B5       | g.chr1:46847931C>G                                               | c.790G>C                                                   | GAG=>CAG     | Glu=>Gln          | p.E264Q               | missense             | NV                   |
| MOSPD2      | B20      | g.chrX:14839445C>G                                               | c.868C>G                                                   | CTT=>GTT     | Leu=>Val          | p.L290V               | missense             | NV                   |
| MPO         | B5       | g.chr17:53713001G>C                                              | c.118C>G                                                   | CTG=>GTG     | Leu=>Val          | p.L40V                | missense             | genotyping           |
| MS4A14      | B5       | g.chr11:59939537C>A                                              | c.520C>A                                                   | CCA=>ACA     | Pro=>Thr          | p.P174T               | missense             | genotyping           |
| MSN         | B20      | g.chrX:64873800G>C                                               | c.1126G>C                                                  | GAG=>CAG     | Glu=>Gln          | p.E376Q               | missense             | NV                   |
| MTBP        | B10      | g.chr8:121599376C>T                                              | c.2351C>T                                                  | TCC=>TTC     | Ser=>Phe          | p.S784F               | missense             | genotyping           |
| MTNR1B      | B10      | g.chr11:92354331C>T                                              | c.294C>T                                                   | CTC=>CTT     | Leu=>Leu          | p.L98L                | synonymous           | NV                   |
| MUTYH       | B20      | g.chr1:45570919G>T                                               | c.595C>A                                                   | CCA=>ACA     | Pro=>Thr          | p.P199T               | missense             | NV                   |
| MYEOV       | B10      | g.chr11:68819667C>T                                              | c.174C>T                                                   | CTC=>CTT     | Leu=>Leu          | p.L58L                | synonymous           | NV                   |
| MYH6        | B8       | g.chr14:22937864G>A                                              | c.1804C>T                                                  | CTC=>TTC     | Leu=>Phe          | p.L602F               | missense             | NV                   |
| MYST1       | B15      | g.chr16:31039293G>A                                              | c.419G>A                                                   | CGC=>CAC     | Arg=>His          | p.R140H               | missense             | genotyping           |
| NCCRP1      | B5       | g.chr19:44381687G>C                                              | c.490G>C                                                   | GAG=>CAG     | Glu=>Gln          | p.E164Q               | missense             | NV                   |
| NCOA4       | B2       | g.chr10:51252248G>C                                              | c.540G>C                                                   | GAG=>GAC     | Glu=>Asp          | p.E180D               | missense             | NV                   |

**Supplementary Table 3 continued. Details of predicted somatic mutations detected in the Discovery Screen.**

| Gene Symbol | Tumor ID | Nucleotide (genomic)#              | Nucleotide (cDNA)\$ | Codon change | Amino acid change | Amino acid (protein)§ | Mutation Type     | Validation status |
|-------------|----------|------------------------------------|---------------------|--------------|-------------------|-----------------------|-------------------|-------------------|
| NCOA7       | B2       | g.chr6:126252650G>C                | c.1757G>C           | GGA=>GCA     | Gly=>Ala          | p.G586A               | missense          | NV                |
| NCOR1       | B9       | g.chr17:16009188C>T                | c.448G>A            | GGA=>AGA     | Gly=>Arg          | p.G150R               | missense          | NV                |
| NEO1        | B2       | g.chr15:71382013G>T                | c.4309G>T           | GAA=>TAA     | Glu=>Stop         | p.E1437*              | nonsense          | NV                |
| NF1         | B5       | g.chr17:26711630G>T                | -                   | -            | -                 | -                     | spliceSite        | genotyping        |
| NFE2L3      | B13      | g.chr7:26190733C>G                 | c.890C>G            | TCT=>TGT     | Ser=>Cys          | p.S297C               | missense          | genotyping        |
| NFE2L3      | B13      | g.chr7:26190885C>G                 | c.1042C>G           | CAT=>GAT     | His=>Asp          | p.H348D               | missense          | genotyping        |
| NFE2L3      | B13      | g.chr7:26191117C>G                 | c.1274C>G           | TCA=>TGA     | Ser=>Stop         | p.S425*               | nonsense          | genotyping        |
| NFE2L3      | B13      | g.chr7:26191508C>A                 | c.1665C>A           | GTC=>GTA     | Val=>Val          | p.V555V               | synonymous        | NV                |
| NGFRAP1     | B20      | g.chrX:102519301G>A                | c.226G>A            | GAA=>AAA     | Glu=>Lys          | p.E76K                | missense          | NV                |
| NKD1        | B15      | g.chr16:49224615G>A                | c.835G>A            | GTG=>ATG     | Val=>Met          | p.V279M               | missense          | genotyping        |
| NLRP13      | B10      | g.chr19:61105215C>T                | c.2787G>A           | CTG=>CTA     | Leu=>Leu          | p.L929L               | synonymous        | NV                |
| NLRP14      | B10      | g.chr11:7020837G>A                 | c.1004G>A           | AGA=>AAA     | Arg=>Lys          | p.R335K               | missense          | genotyping        |
| NLRP9       | B20      | g.chr19:60927249G>A                | c.2068C>T           | CTG=>TTG     | Leu=>Leu          | p.L690L               | synonymous        | NV                |
| NPR2        | B15      | g.chr9:35799413G>C                 | c.3115G>C           | GAG=>CAG     | Glu=>Gln          | p.E1039Q              | missense          | genotyping        |
| NR1D2       | B5       | g.chr3:23976187C>T                 | c.394C>T            | CAA=>TAA     | Gln=>Stop         | p.Q132*               | nonsense          | genotyping        |
| NT5C3L      | B9       | g.chr17:37242235G>C                | c.225C>G            | CAC=>CAG     | His=>Gln          | p.H75Q                | missense          | NV                |
| NUP210      | B15      | g.chr3:13370078G>C                 | c.2604C>G           | CTC=>CTG     | Leu=>Leu          | p.L868L               | synonymous        | NV                |
| NUP62       | B10      | g.chr19:55103337C>T                | c.1540G>A           | GAG=>AAG     | Glu=>Lys          | p.E514K               | missense          | genotyping        |
| NUPL1       | B5       | g.chr13:24803637C>T                | c.1340C>T           | CCA=>CTA     | Pro=>Leu          | p.P447L               | missense          | NV                |
| OGDH        | B15      | g.chr7:44630570C>A                 | c.103C>A            | CAA=>AAA     | Gln=>Lys          | p.Q35K                | missense          | genotyping        |
| OIP5        | B10      | g.chr15:39411455G>C                | c.339C>G            | GTC=>GTG     | Val=>Val          | p.V113V               | synonymous        | NV                |
| OPCML       | B10      | g.chr11:132032309G>A               | c.283C>T            | CCA=>TCA     | Pro=>Ser          | p.P95S                | missense          | genotyping        |
| OR10A4      | B10      | g.chr11:6854722G>A                 | c.268G>A            | GAC=>AAC     | Asp=>Asn          | p.D90N                | missense          | genotyping        |
| OR2B2       | B5       | g.chr6:27987022G>C                 | c.1055C>G           | CCT=>CGT     | Pro=>Arg          | p.P352R               | missense          | genotyping        |
| OR4F6       | B10      | g.chr15:100163966_100163969delTAGA | c.419_422delITAGA   | -            | -                 | -                     | Frame shift indel | NV                |
| OR4S2       | B2       | g.chr11:55175650G>A                | c.695G>A            | CGC=>CAC     | Arg=>His          | p.R232H               | missense          | NV                |
| OR52N2      | B5       | g.chr11:5798759C>G                 | c.618C>G            | CTC=>CTG     | Leu=>Leu          | p.L206L               | synonymous        | NV                |
| OR5B17      | B2       | g.chr11:57882559C>A                | c.560G>T            | TGC=>TTC     | Cys=>Phe          | p.C187F               | missense          | NV                |
| OR5D13      | B2       | g.chr11:55298025T>A                | c.536T>A            | TTT=>TAT     | Phe=>Tyr          | p.F179Y               | missense          | NV                |
| OR5I1       | B9       | g.chr11:55460135insA               | c.318insA           | -            | -                 | -                     | Frame shift indel | NV                |
| OR5M9       | B10      | g.chr11:55987241G>C                | c.213C>G            | TTC=>TTG     | Phe=>Leu          | p.F71L                | missense          | genotyping        |
| OR8K3       | B13      | g.chr11:55842436A>G                | c.78A>G             | CCA=>CCG     | Pro=>Pro          | p.P26P                | synonymous        | NV                |
| OR9Q1       | B5       | g.chr11:57704009G>C                | c.517G>C            | GAG=>CAG     | Glu=>Gln          | p.E173Q               | missense          | genotyping        |
| OSGIN2      | B8       | g.chr8:91006157C>T                 | c.740C>T            | TCT=>TTT     | Ser=>Phe          | p.S247F               | missense          | genotyping        |
| PADI4       | B13      | g.chr1:17562797G>C                 | c.1952G>C           | AGA=>ACA     | Arg=>Thr          | p.R651T               | missense          | genotyping        |
| PAK3        | B9       | g.chrX:110326372C>T                | c.1255C>T           | CGA=>TGA     | Arg=>Stop         | p.R419*               | nonsense          | genotyping        |
| PANX1       | B15      | g.chr11:93502303G>A                | c.177G>A            | TCG=>TCA     | Ser=>Ser          | p.S59S                | synonymous        | NV                |
| PAOX        | B2       | g.chr10:135047602C>T               | c.1017C>T           | ATC=>ATT     | Ile=>Ile          | p.I339I               | synonymous        | NV                |
| PARD6B      | B8       | g.chr20:48799813A>T                | c.500A>T            | AAA=>ATA     | Lys=>Ile          | p.K167I               | missense          | genotyping        |
| PCDHA13     | B15      | g.chr5:140244290G>A                | c.2253G>A           | TCG=>TCA     | Ser=>Ser          | p.S751S               | synonymous        | NV                |
| PCDHB3      | B2       | g.chr5:140462767G>A                | c.2350G>A           | GAG=>AAG     | Glu=>Lys          | p.E784K               | missense          | NV                |
| PCDHGA2     | B13      | g.chr5:140699217C>T                | c.495C>T            | AAC=>AAT     | Asn=>Asn          | p.N165N               | synonymous        | NV                |
| PCIF1       | B13      | g.chr20:44007787G>A                | c.1199G>A           | CGC=>CAC     | Arg=>His          | p.R400H               | missense          | genotyping        |
| PCK1        | B2       | g.chr20:55571272C>T                | c.521C>T            | ACG=>ATG     | Thr=>Met          | p.T174M               | missense          | NV                |
| PCP2        | B10      | g.chr19:7604334G>A                 | c.10C>T             | CAG=>TAG     | Gln=>Stop         | p.Q4*                 | nonsense          | NV                |
| PDXDC1      | B5       | g.chr16:15003163T>A                | c.191T>A            | TTA=>TAA     | Leu=>Stop         | p.L64*                | nonsense          | NV                |
| PFKL        | B10      | g.chr21:44556440C>T                | c.403C>T            | CGC=>TGC     | Arg=>Cys          | p.R135C               | missense          | genotyping        |
| PGLYRP2     | B8       | g.chr19:15448180C>T                | c.301G>A            | GAC=>AAC     | Asp=>Asn          | p.D101N               | missense          | NV                |
| PIP5K3      | B5       | g.chr2:208898942C>G                | c.3162C>G           | CTC=>CTG     | Leu=>Leu          | p.L1054L              | synonymous        | NV                |
| PIPOX       | B5       | g.chr17:24396034A>T                | c.146A>T            | CAT=>CTT     | His=>Leu          | p.H49L                | missense          | genotyping        |
| PLA2G3      | B10      | g.chr22:29866050G>A                | c.291C>T            | ATC=>ATT     | Ile=>Ile          | p.I97I                | synonymous        | NV                |
| PLCB1       | B10      | g.chr20:8669032C>G                 | c.2350C>G           | CTG=>GTG     | Leu=>Val          | p.L784V               | missense          | genotyping        |
| PLXNB1      | B15      | g.chr3:48423472G>A                 | c.6118C>T           | CGG=>TGG     | Arg=>Trp          | p.R2040W              | missense          | genotyping        |

**Supplementary Table 3 continued. Details of predicted somatic mutations detected in the Discovery Screen.**

| Gene Symbol | Tumor ID | Nucleotide (genomic)#                      | Nucleotide (cDNA)\$           | Codon change | Amino acid change | Amino acid (protein)§ | Mutation Type     | Validation status |
|-------------|----------|--------------------------------------------|-------------------------------|--------------|-------------------|-----------------------|-------------------|-------------------|
| PNPLA2      | B13      | g.chr11:811806A>C                          | c.366A>C                      | TCA=>TCC     | Ser=>Ser          | p.S122S               | synonymous        | NV                |
| POLD1       | B5       | g.chr19:55601316C>G                        | c.1308C>G                     | TTC=>TTG     | Phe=>Leu          | p.F436L               | missense          | genotyping        |
| POLG        | B15      | g.chr15:87672974C>T                        | c.1116G>A                     | GAG=>GAA     | Glu=>Glu          | p.E372E               | synonymous        | NV                |
| POLR3B      | B2       | g.chr12:105375054C>T                       | c.2302C>T                     | CGT=>TGT     | Arg=>Cys          | p.R768C               | missense          | NV                |
| PORCN       | B8       | g.chrX:48254673C>G                         | c.183C>G                      | TTC=>TTG     | Phe=>Leu          | p.F61L                | missense          | genotyping        |
| PIIG        | B13      | g.chr2:170201745A>G                        | c.1731A>G                     | TCA=>TCG     | Ser=>Ser          | p.S577S               | synonymous        | NV                |
| PPM1G       | B10      | g.chr2:27460445C>T                         | c.844G>A                      | GAT=>AAT     | Asp=>Asn          | p.D282N               | missense          | genotyping        |
| PPP1R9A     | B5       | g.chr7:94378002C>T                         | c.641C>T                      | TCT=>TTT     | Ser=>Phe          | p.S214F               | missense          | genotyping        |
| PRDM10      | B5       | g.chr11:129333003G>C                       | c.82C>G                       | CCG=>GCG     | Pro=>Ala          | p.P28A                | missense          | genotyping        |
| PREP        | B17      | g.chr6:105832909G>A                        | c.1936C>T                     | CCG=>TCG     | Pro=>Ser          | p.P646S               | missense          | NV                |
| PRMT5       | B9       | g.chr14:22463743G>C                        | c.955C>G                      | CTG=>GTG     | Leu=>Val          | p.L319V               | missense          | genotyping        |
| PRMT7       | B10      | g.chr16:66948514C>G                        | c.1965C>G                     | GCC=>GCG     | Ala=>Ala          | p.A655A               | synonymous        | NV                |
| PROKR1      | B9       | g.chr2:68726877C>G                         | c.420C>G                      | GTC=>GTG     | Val=>Val          | p.V140V               | synonymous        | NV                |
| PRPSAP2     | B5       | g.chr17:18721817G>C                        | c.321G>C                      | GTG=>GTC     | Val=>Val          | p.V107V               | synonymous        | NV                |
| PTPRC       | B5       | g.chr19:196969980A>C                       | c.1686A>C                     | GCA=>GCC     | Ala=>Ala          | p.A562A               | synonymous        | NV                |
| PTPRH       | B10      | g.chr19:60389707_60389720delCCGGGACCAGTCAT | c.769_782delCCGGGACCAGTCAT    | -            | -                 | -                     | Frame shift indel | NV                |
| PWP2        | B13      | g.chr21:44358157G>A                        | -                             | -            | -                 | -                     | spliceSite        | genotyping        |
| RBM46       | B9       | g.chr4:155939445G>A                        | c.681G>A                      | GTG=>GTA     | Val=>Val          | p.V227V               | synonymous        | NV                |
| RBM6        | B17      | g.chr3:50070421_50070421delC               | c.1423_1423delC               | -            | -                 | -                     | Frame shift indel | NV                |
| RBMS2       | B5       | g.chr12:55261248G>C                        | c.556G>C                      | GAG=>CAG     | Glu=>Gln          | p.E186Q               | missense          | NV                |
| RFC1        | B5       | g.chr4:38968006G>C                         | c.3217C>G                     | CCA=>GCA     | Pro=>Ala          | p.P1073A              | missense          | genotyping        |
| RHOT1       | B5       | g.chr17:27558138G>C                        | c.1513G>C                     | GAA=>CAA     | Glu=>Gln          | p.E505Q               | missense          | NV                |
| RHPN2       | B17      | g.chr19:38174669C>A                        | c.1544G>T                     | CGA=>CTA     | Arg=>Leu          | p.R515L               | missense          | NV                |
| RPS11       | B5       | g.chr19:54692595G>C                        | c.154G>C                      | GAG=>CAG     | Glu=>Gln          | p.E52Q                | missense          | genotyping        |
| RPS2        | B17      | g.chr16:1952795G>A                         | c.492C>T                      | CCC=>CCT     | Pro=>Pro          | p.P164P               | synonymous        | NV                |
| RSHL1       | B2       | g.chr19:50990978insCTCCTCGCCCTCCTCC TC     | c.11insCTCCTCGCCCTCCTCCCTCCTC | -            | -                 | -                     | indel             | NV                |
| RSL1D1      | B8       | g.chr16:11839366insT                       | c.221insT                     | -            | -                 | -                     | Frame shift indel | NV                |
| S1PR1       | B15      | g.chr1:101478121C>T                        | c.993C>T                      | TGC=>TGT     | Cys=>Cys          | p.C331C               | synonymous        | NV                |
| SACS        | B2       | g.chr13:22810400C>A                        | c.5174G>T                     | TGC=>TTC     | Cys=>Phe          | p.C1725F              | missense          | NV                |
| SAMD9L      | B5       | g.chr7:92601013G>A                         | c.2208C>T                     | ATC=>ATT     | Ile=>Ile          | p.I736I               | synonymous        | NV                |
| SAMD9L      | B5       | g.chr7:92601459G>A                         | c.1762C>T                     | CAA=>TAA     | Gln=>Stop         | p.Q588*               | nonsense          | genotyping        |
| SAR1B       | B2       | g.chr5:133973176G>C                        | c.332C>G                      | TCA=>TGA     | Ser=>Stop         | p.S111*               | nonsense          | NV                |
| SASH1       | B10      | g.chr6:148803043C>T                        | c.316C>T                      | CAG=>TAG     | Gln=>Stop         | p.Q106*               | nonsense          | genotyping        |
| SCRN3       | B5       | g.chr2:175000827_175000839delTCAAATTTATCAG | c.43_55delTCAAATTTATCAG       | -            | -                 | -                     | Frame shift indel | NV                |
| SDK1        | B5       | g.chr7:4180413C>T                          | c.295C>T                      | CAG=>TAG     | Gln=>Stop         | p.Q99*                | nonsense          | genotyping        |
| SEMA4F      | B9       | g.chr2:74755209C>G                         | c.899C>G                      | CCT=>CGT     | Pro=>Arg          | p.P300R               | missense          | genotyping        |
| SEMA4F      | B9       | g.chr2:74755302C>T                         | c.992C>T                      | TCT=>TTT     | Ser=>Phe          | p.S331F               | missense          | genotyping        |
| SEMA6C      | B15      | g.chr1:149378753C>A                        | c.282G>T                      | GGG=>GGT     | Gly=>Gly          | p.G94G                | synonymous        | NV                |
| SEMA6D      | B13      | g.chr15:45843717C>G                        | c.1020C>G                     | TTC=>TTG     | Phe=>Leu          | p.F340L               | missense          | genotyping        |
| SERPING1    | B10      | g.chr11:57124026C>T                        | c.150C>T                      | ATC=>ATT     | Ile=>Ile          | p.I50I                | synonymous        | NV                |
| SESN2       | B13      | g.chr1:28458962_28458962delC               | c.18_18delC                   | -            | -                 | -                     | Frame shift indel | Sanger sequencing |
| SF3B2       | B2       | g.chr11:65582189C>G                        | c.866C>G                      | TCT=>TGT     | Ser=>Cys          | p.S289C               | missense          | NV                |
| SF4         | B10      | g.chr19:19288323G>A                        | c.114C>T                      | CTC=>CTT     | Leu=>Leu          | p.L38L                | synonymous        | NV                |
| SH3RF1      | B17      | g.chr4:170279847C>T                        | c.1325G>A                     | CGG=>CAG     | Arg=>Gln          | p.R442Q               | missense          | NV                |
| SHPK        | B13      | g.chr17:3474111G>A                         | c.474C>T                      | ATC=>ATT     | Ile=>Ile          | p.I158I               | synonymous        | NV                |
| SIL1        | B13      | g.chr5:138310948G>T                        | c.1143C>A                     | ATC=>ATA     | Ile=>Ile          | p.I381I               | synonymous        | NV                |
| SLAMF9      | B5       | g.chr1:158188132G>C                        | c.813C>G                      | CTC=>CTG     | Leu=>Leu          | p.L271L               | synonymous        | NV                |
| SLC14A2     | B9       | g.chr18:41512974insC                       | c.214insC                     | -            | -                 | -                     | Frame shift indel | NV                |
| SLC15A1     | B8       | g.chr13:98137859C>T                        | c.1804G>A                     | GGA=>AGA     | Gly=>Arg          | p.G602R               | missense          | NV                |

**Supplementary Table 3 continued. Details of predicted somatic mutations detected in the Discovery Screen.**

| Gene Symbol | Tumor ID | Nucleotide (genomic)#                      | Nucleotide (cDNA)\$          | Codon change | Amino acid change | Amino acid (protein)§ | Mutation Type     | Validation status |
|-------------|----------|--------------------------------------------|------------------------------|--------------|-------------------|-----------------------|-------------------|-------------------|
| SLC22A17    | B8       | g.chr14:22886185G>A                        | c.1293C>T                    | ACC=>ACT     | Thr=>Thr          | p.T431T               | synonymous        | NV                |
| SLC25A25    | B10      | g.chr9:129900756G>A                        | c.90G>A                      | CTG=>CTA     | Leu=>Leu          | p.L30L                | synonymous        | NV                |
| SLC25A44    | B2       | g.chr1:154446706G>A                        | c.805G>A                     | GAA=>AAA     | Glu=>Lys          | p.E269K               | missense          | NV                |
| SLC26A4     | B9       | g.chr7:107140268G>C                        | c.2284G>C                    | GAG=>CAG     | Glu=>Gln          | p.E762Q               | missense          | genotyping        |
| SLC41A3     | B17      | g.chr3:127258016G>C                        | c.70C>G                      | CTT=>GTT     | Leu=>Val          | p.L24V                | missense          | NV                |
| SLC44A3     | B2       | g.chr1:95083576G>A                         | c.896G>A                     | TGG=>TAG     | Trp=>Stop         | p.W299*               | nonsense          | NV                |
| SLC45A1     | B10      | g.chr1:8313160G>A                          | c.1020G>A                    | CCG=>CCA     | Pro=>Pro          | p.P340P               | synonymous        | NV                |
| SLC5A8      | B9       | g.chr12:100084554C>T                       | c.1375G>A                    | GGA=>AGA     | Gly=>Arg          | p.G459R               | missense          | NV                |
| SLCO4C1     | B10      | g.chr5:101655119G>C                        | c.446C>G                     | TCA=>TGA     | Ser=>Stop         | p.S149*               | nonsense          | NV                |
| SMPD4       | B8       | g.chr2:130650631G>A                        | c.122C>T                     | GCG=>GTG     | Ala=>Val          | p.A41V                | missense          | NV                |
| SNPH        | B20      | g.chr20:1233951A>T                         | c.738A>T                     | GCA=>GCT     | Ala=>Ala          | p.A246A               | synonymous        | NV                |
| SP110       | B5       | g.chr2:230782913G>C                        | c.806C>G                     | TCC=>TGC     | Ser=>Cys          | p.S269C               | missense          | genotyping        |
| SPAG1       | B5       | g.chr8:101306582C>G                        | c.1694C>G                    | TCA=>TGA     | Ser=>Stop         | p.S565*               | nonsense          | genotyping        |
| SPAG1       | B5       | g.chr8:101306654C>T                        | c.1766C>T                    | TCT=>TTT     | Ser=>Phe          | p.S589F               | missense          | genotyping        |
| SPARC       | B2       | g.chr5:151035889G>C                        | c.54C>G                      | GCC=>GCG     | Ala=>Ala          | p.A18A                | synonymous        | NV                |
| SPTB        | B8       | g.chr14:64306151A>G                        | c.5847T>C                    | AAT=>AAC     | Asn=>Asn          | p.N1949N              | synonymous        | NV                |
| SRCAP       | B2       | g.chr16:30643506C>T                        | c.5260C>T                    | CTG=>TTG     | Leu=>Leu          | p.L1754L              | synonymous        | NV                |
| SRRM2       | B5       | g.chr16:2756097C>T                         | c.5567C>T                    | ACA=>ATA     | Thr=>Ile          | p.T1856I              | missense          | genotyping        |
| ST6GAL2     | B9       | g.chr2:106816941G>A                        | c.1037C>T                    | TCG=>TTG     | Ser=>Leu          | p.S346L               | missense          | NV                |
| STAG2       | B10      | g.chrX:123048197C>A                        | c.3173C>A                    | TCA=>TAA     | Ser=>Stop         | p.S1058*              | nonsense          | genotyping        |
| STRN4       | B5       | g.chr19:51928261G>T                        | c.612C>A                     | GGC=>GGA     | Gly=>Gly          | p.G204G               | synonymous        | NV                |
| SUPT16H     | B10      | g.chr14:20895268T>A                        | c.2588A>T                    | GAC=>GTC     | Asp=>Val          | p.D863V               | missense          | genotyping        |
| SUPT16H     | B10      | g.chr14:20895269C>G                        | c.2587G>C                    | GAC=>CAC     | Asp=>His          | p.D863H               | missense          | genotyping        |
| SYNE1       | B10      | g.chr6:152587376G>T                        | c.21255C>A                   | TTC=>TTA     | Phe=>Leu          | p.F7085L              | missense          | genotyping        |
| SYNE1       | B10      | g.chr6:152587406G>C                        | c.21225C>G                   | CTC=>CTG     | Leu=>Leu          | p.L7075L              | synonymous        | NV                |
| TAF1        | B8       | g.chrX:70504672C>T                         | c.339C>T                     | ATC=>ATT     | Ile=>Ile          | p.I113I               | synonymous        | NV                |
| TAOK3       | B8       | g.chr12:117084201C>G                       | c.1914G>C                    | AAG=>AAC     | Lys=>Asn          | p.K638N               | missense          | genotyping        |
| TAOK3       | B5       | g.chr12:117094743G>A                       | c.1801C>T                    | CTC=>TTC     | Leu=>Phe          | p.L601F               | missense          | genotyping        |
| TAS2R9      | B10      | g.chr12:10853615G>A                        | c.327C>T                     | CTC=>CTT     | Leu=>Leu          | p.L109L               | synonymous        | NV                |
| TDRD1       | B15      | g.chr10:115963268G>C                       | c.2005G>C                    | GAT=>CAT     | Asp=>His          | p.D669H               | missense          | genotyping        |
| TET1        | B5       | g.chr10:70097011C>T                        | c.4665C>T                    | CTC=>CTT     | Leu=>Leu          | p.L1555L              | synonymous        | NV                |
| TEX14       | B13      | g.chr17:54031771G>T                        | c.1934C>A                    | TCT=>TAT     | Ser=>Tyr          | p.S645Y               | missense          | genotyping        |
| TG          | B15      | g.chr8:134053254C>A                        | c.6009C>A                    | GAC=>GAA     | Asp=>Glu          | p.D2003E              | missense          | genotyping        |
| TGFB2       | B8       | g.chr1:216586988A>G                        | c.322A>G                     | ATG=>GTG     | Met=>Val          | p.M108V               | missense          | NV                |
| TIA1        | B15      | g.chr2:70297071T>C                         | c.648A>G                     | GTA=>GTG     | Val=>Val          | p.V216V               | synonymous        | NV                |
| TICAM1      | B2       | g.chr19:4768010G>A                         | c.1380C>T                    | TTC=>TTT     | Phe=>Phe          | p.F460F               | synonymous        | NV                |
| TLL1        | B8       | g.chr4:167155062C>G                        | c.942C>G                     | CTC=>CTG     | Leu=>Leu          | p.L314L               | synonymous        | NV                |
| TMCC2       | B17      | g.chr1:203464441_203464442delCT            | c.127_128delICT              | -            | -                 | -                     | Frame shift indel | NV                |
| TMEM35      | B20      | g.chrX:100236409C>T                        | c.312C>T                     | TTC=>TTT     | Phe=>Phe          | p.F104F               | synonymous        | NV                |
| TMEM42      | B8       | g.chr3:44881655C>G                         | c.459C>G                     | CCC=>CCG     | Pro=>Pro          | p.P153P               | synonymous        | NV                |
| TMEM44      | B5       | g.chr3:195790562C>T                        | c.1305G>A                    | CTG=>CTA     | Leu=>Leu          | p.L435L               | synonymous        | NV                |
| TMEM56      | B20      | g.chr1:95429775C>G                         | c.555C>G                     | TTC=>TTG     | Phe=>Leu          | p.F185L               | missense          | NV                |
| TMEM63A     | B2       | g.chr1:224116614C>T                        | c.1012G>A                    | GAA=>AAA     | Glu=>Lys          | p.E338K               | missense          | NV                |
| TMPRSS13    | B5       | g.chr11:117294523_117294537delCTGGAGATGCCT | c.263_277delIGGGCTGGAGATGCCT | -            | -                 | -                     | indel             | NV                |
| TMPRSS2     | B9       | g.chr21:41761628insCT                      | c.109insCT                   | -            | -                 | -                     | Frame shift indel | Sanger sequencing |
| TNFAIP8L3   | B15      | g.chr15:49137513G>T                        | c.736C>A                     | CAC=>AAC     | His=>Asn          | p.H246N               | missense          | genotyping        |
| TNFAIP8L3   | B15      | g.chr15:49137514G>T                        | c.735C>A                     | ACC=>ACA     | Thr=>Thr          | p.T245T               | synonymous        | NV                |
| TP53        | B8       | g.chr17:7519167T>C                         | c.488A>G                     | TAC=>TGC     | Tyr=>Cys          | p.Y163C               | missense          | genotyping        |
| TP53        | B9       | g.chr17:7519238_7519251delICTTGGCCAGTTGGC  | c.418_431delICTTGGCCAGTTGGC  | -            | -                 | -                     | Frame shift indel | Sanger sequencing |
| TP53BP1     | B2       | g.chr15:41535394C>A                        | c.2689G>T                    | GAA=>TAA     | Glu=>Stop         | p.E897*               | nonsense          | NV                |
| TPCN1       | B8       | g.chr12:112195425C>T                       | c.789C>T                     | TTC=>TTT     | Phe=>Phe          | p.F263F               | synonymous        | NV                |

**Supplementary Table 3 continued. Details of predicted somatic mutations detected in the Discovery Screen.**

| Gene Symbol | Tumor ID | Nucleotide (genomic)#                 | Nucleotide (cDNA)\$    | Codon change | Amino acid change | Amino acid (protein)§ | Mutation Type     | Validation status |
|-------------|----------|---------------------------------------|------------------------|--------------|-------------------|-----------------------|-------------------|-------------------|
| TRIM23      | B15      | g.chr5:64942586G>A                    | c.686C>T               | TCA=>TTA     | Ser=>Leu          | p.S229L               | missense          | genotyping        |
| TRIM62      | B17      | g.chr1:33419341G>T                    | c.280C>A               | CAG=>AAG     | Gln=>Lys          | p.Q94K                | missense          | NV                |
| TRPM2       | B20      | g.chr21:44613600C>T                   | c.717C>T               | ATC=>ATT     | Ile=>Ile          | p.I239I               | synonymous        | NV                |
| TRPM5       | B5       | g.chr11:2383864C>G                    | c.3285G>C              | CTG=>CTC     | Leu=>Leu          | p.L1095L              | synonymous        | NV                |
| TRPM5       | B10      | g.chr9:76593377G>A                    | c.2640C>T              | TTC=>TTT     | Phe=>Phe          | p.F880F               | synonymous        | NV                |
| TRPV5       | B15      | g.chr7:142315962G>T                   | c.2030C>A              | GCC=>GAC     | Ala=>Asp          | p.A677D               | missense          | genotyping        |
| TSR1        | B5       | g.chr17:2174797C>G                    | c.2097G>C              | CTG=>CTC     | Leu=>Leu          | p.L699L               | synonymous        | NV                |
| TTC3        | B5       | g.chr21:37486323C>T                   | c.5156C>T              | TCT=>TTT     | Ser=>Phe          | p.S1719F              | missense          | NV                |
| TTC3        | B5       | g.chr21:37486341C>G                   | c.5174C>G              | TCT=>TGT     | Ser=>Cys          | p.S1725C              | missense          | NV                |
| TULP3       | B9       | g.chr12:2909750C>T                    | c.470C>T               | TCT=>TTT     | Ser=>Phe          | p.S157F               | missense          | NV                |
| TYR         | B13      | g.chr11:88551006G>A                   | c.237G>A               | TCG=>TCA     | Ser=>Ser          | p.S79S                | synonymous        | NV                |
| UBC         | B8       | g.chr12:123964210C>T                  | c.61G>A                | GAC=>AAC     | Asp=>Asn          | p.D21N                | missense          | genotyping        |
| UBR4        | B5       | g.chr1:19349822A>T                    | c.7266T>A              | ATT=>ATA     | Ile=>Ile          | p.I2422I              | synonymous        | NV                |
| UGCGL2      | B10      | g.chr13:95304647G>A                   | c.4092C>T              | CGC=>CGT     | Arg=>Arg          | p.R1364R              | synonymous        | NV                |
| UPB1        | B5       | g.chr22:23236778A>G                   | c.426A>G               | GCA=>GCG     | Ala=>Ala          | p.A142A               | synonymous        | NV                |
| UPF1        | B13      | g.chr19:18832188C>T                   | c.2241C>T              | TTC=>TTT     | Phe=>Phe          | p.F747F               | synonymous        | NV                |
| USP26       | B17      | g.chrX:131988074_131988084delTGGCCTTT | c.902_912delITGGCCTTTT | -            | -                 | -                     | Frame shift indel | Sanger sequencing |
| USP48       | B10      | g.chr1:21928841T>C                    | c.1243A>G              | ATG=>GTG     | Met=>Val          | p.M415V               | missense          | genotyping        |
| USP5        | B17      | g.chr12:6843489C>T                    | c.2113C>T              | CTC=>TTC     | Leu=>Phe          | p.L705F               | missense          | NV                |
| USP5        | B20      | g.chr12:6844609A>G                    | c.2419A>G              | ATT=>GTT     | Ile=>Val          | p.I807V               | missense          | NV                |
| UTX         | B8       | g.chrX:44827705C>A                    | c.3341C>A              | TCA=>TAA     | Ser=>Stop         | p.S1114*              | nonsense          | NV                |
| UVRAG       | B9       | g.chr11:75529941G>C                   | c.1936G>C              | GGT=>CGT     | Gly=>Arg          | p.G646R               | missense          | genotyping        |
| VCPIP1      | B10      | g.chr8:67741283G>A                    | c.465C>T               | GGC=>GGT     | Gly=>Gly          | p.G155G               | synonymous        | NV                |
| VN1R4       | B17      | g.chr19:58462070G>T                   | c.661C>A               | CTC=>ATC     | Leu=>Ile          | p.L221I               | missense          | NV                |
| VPS13B      | B15      | g.chr8:100238142C>T                   | c.2203C>T              | CTT=>TTT     | Leu=>Phe          | p.L735F               | missense          | NV                |
| VPS13D      | B20      | g.chr1:12253676G>T                    | c.2011G>T              | GAA=>TAA     | Glu=>Stop         | p.E671*               | nonsense          | NV                |
| WDR34       | B15      | g.chr9:130435934C>A                   | c.1521G>T              | GTG=>GTT     | Val=>Val          | p.V507V               | synonymous        | NV                |
| WDR52       | B9       | g.chr3:114598207G>C                   | c.1627C>G              | CTT=>GTT     | Leu=>Val          | p.L543V               | missense          | NV                |
| XAF1        | B8       | g.chr17:6602265C>A                    | c.166C>A               | CAG=>AAG     | Gln=>Lys          | p.Q56K                | missense          | NV                |
| YAP1        | B10      | g.chr11:101490268G>A                  | c.505G>A               | GAT=>AAT     | Asp=>Asn          | p.D169N               | missense          | genotyping        |
| ZDHHC23     | B10      | g.chr3:115155509G>C                   | c.434G>C               | GGA=>GCA     | Gly=>Ala          | p.G145A               | missense          | genotyping        |
| ZFHX3       | B15      | g.chr16:71379700C>T                   | c.9976G>A              | GCC=>ACC     | Ala=>Thr          | p.A3326T              | missense          | NV                |
| ZFP37       | B20      | g.chr9:114845466G>A                   | c.1253C>T              | TCA=>TTA     | Ser=>Leu          | p.S418L               | missense          | NV                |
| ZHX3        | B2       | g.chr20:39265653T>C                   | c.1318A>G              | AGT=>GGT     | Ser=>Gly          | p.S440G               | missense          | NV                |
| ZIK1        | B5       | g.chr19:62793764A>T                   | c.773A>T               | CAG=>CTG     | Gln=>Leu          | p.Q258L               | missense          | genotyping        |
| ZKSCAN4     | B9       | g.chr6:28321104T>A                    | c.1407A>T              | GAA=>GAT     | Glu=>Asp          | p.E469D               | missense          | NV                |
| ZMYND10     | B5       | g.chr3:50357582C>G                    | c.178G>C               | GAG=>CAG     | Glu=>Gln          | p.E60Q                | missense          | genotyping        |
| ZMYND8      | B2       | g.chr20:45308303C>G                   | c.2140G>C              | GAT=>CAT     | Asp=>His          | p.D714H               | missense          | NV                |
| ZMYND8      | B2       | g.chr20:45308369C>G                   | c.2074G>C              | GAG=>CAG     | Glu=>Gln          | p.E692Q               | missense          | NV                |
| ZMYND8      | B2       | g.chr20:45308415C>T                   | c.2028G>A              | GAG=>GAA     | Glu=>Glu          | p.E676E               | synonymous        | NV                |
| ZNF124      | B5       | g.chr1:245389669G>A                   | c.100C>T               | CAG=>TAG     | Gln=>Stop         | p.Q34*                | nonsense          | NV                |
| ZNF174      | B13      | g.chr16:3398555A>T                    | c.859A>T               | AGC=>TGC     | Ser=>Cys          | p.S287C               | missense          | genotyping        |
| ZNF295      | B2       | g.chr21:42286840T>A                   | c.434A>T               | CAA=>CTA     | Gln=>Leu          | p.Q145L               | missense          | NV                |
| ZNF295      | B5       | g.chr21:42287117C>A                   | c.157G>A               | GAA=>AAA     | Glu=>Lys          | p.E53K                | missense          | genotyping        |
| ZNF32       | B9       | g.chr10:43459613A>T                   | c.713T>A               | ATC=>AAC     | Ile=>Asn          | p.I238N               | missense          | NV                |
| ZNF329      | B9       | g.chr19:63331075C>T                   | c.1608G>A              | GAG=>GAA     | Glu=>Glu          | p.E536E               | synonymous        | NV                |
| ZNF432      | B20      | g.chr19:57228798C>G                   | c.1946G>C              | GGA=>GCA     | Gly=>Ala          | p.G649A               | missense          | NV                |
| ZNF471      | B15      | g.chr19:61719525C>G                   | c.103C>G               | CAG=>GAG     | Gln=>Glu          | p.Q35E                | missense          | genotyping        |
| ZNF502      | B10      | g.chr3:44738353G>C                    | c.1040G>C              | GGA=>GCA     | Gly=>Ala          | p.G347A               | missense          | genotyping        |
| ZNF536      | B15      | g.chr19:35717711C>T                   | c.2288C>T              | TCC=>TTC     | Ser=>Phe          | p.S763F               | missense          | genotyping        |
| ZNF552      | B5       | g.chr19:63011821C>T                   | c.623G>A               | GGA=>GAA     | Gly=>Glu          | p.G208E               | missense          | NV                |
| ZNF559      | B15      | g.chr19:9313381insT                   | c.254insT              | -            | -                 | -                     | Frame shift indel | NV                |
| ZNF592      | B20      | g.chr15:83127154G>C                   | c.244G>C               | GAG=>CAG     | Glu=>Gln          | p.E82Q                | missense          | NV                |

**Supplementary Table 3 continued. Details of predicted somatic mutations detected in the Discovery Screen.**

| Gene Symbol | Tumor ID | Nucleotide (genomic)# | Nucleotide (cDNA)\$ | Codon change | Amino acid change | Amino acid (protein)§ | Mutation Type | Validation status |
|-------------|----------|-----------------------|---------------------|--------------|-------------------|-----------------------|---------------|-------------------|
| ZNF623      | B5       | g.chr8:144804284A>T   | c.1099A>T           | AGA=>TGA     | Arg=>Stop         | p.R367*               | nonsense      | genotyping        |
| ZNF80       | B9       | g.chr3:115437890C>G   | c.722G>C            | GGA=>GCA     | Gly=>Ala          | p.G241A               | missense      | genotyping        |
| ZP4         | B8       | g.chr1:236115394C>A   | c.1080G>T           | CTG=>CTT     | Leu=>Leu          | p.L360L               | synonymous    | NV                |
| ZSCAN12     | B5       | g.chr6:28474071C>A    | c.91G>T             | GAT=>TAT     | Asp=>Tyr          | p.D31Y                | missense      | NV                |
| ZSCAN22     | B20      | g.chr19:63541504A>T   | c.476A>T            | AAT=>ATT     | Asn=>Ile          | p.N159I               | missense      | NV                |

#Genomic positions are coordinates in the hg18 UCSC release of the human genome. g., genomic sequence; c., cDNA sequence; p., protein sequence. \$ Mutated positions indicate the sites in the protein-coding region of the cDNA sequence. § Frame shift indel, frameshift insertions and deletions; indel, in frame insertions and deletions which still change more than one single codon. \* Stop codon. NV, not validated.



**Supplementary Table 4. Summary statistics of targeted exon sequencing in the Prevalence Screen.**

| <b>Samples</b> | <b>Mean fold coverage</b> | <b>% of targets covered by at least 1 ×</b> | <b>% of targets covered by at least 10 ×</b> |
|----------------|---------------------------|---------------------------------------------|----------------------------------------------|
| B100-Blood     | 70.04                     | 98.60                                       | 90.40                                        |
| B100-Tumor     | 80.57                     | 98.90                                       | 92.00                                        |
| B101-Blood     | 62.80                     | 98.50                                       | 89.70                                        |
| B101-Tumor     | 73.66                     | 98.70                                       | 91.20                                        |
| B102-Blood     | 63.09                     | 98.20                                       | 89.00                                        |
| B102-Tumor     | 61.85                     | 98.50                                       | 89.80                                        |
| B103-Blood     | 69.19                     | 98.50                                       | 89.90                                        |
| B103-Tumor     | 66.91                     | 98.60                                       | 90.20                                        |
| B104-0-Blood   | 79.26                     | 98.80                                       | 91.90                                        |
| B104-0-Tumor   | 68.69                     | 98.50                                       | 89.70                                        |
| B104-Blood     | 76.45                     | 98.60                                       | 91.00                                        |
| B104-Tumor     | 63.40                     | 98.40                                       | 89.30                                        |
| B105-0-Blood   | 68.18                     | 98.60                                       | 90.60                                        |
| B105-0-Tumor   | 64.98                     | 98.50                                       | 89.70                                        |
| B105-1-Blood   | 53.37                     | 98.40                                       | 87.80                                        |
| B105-1-Tumor   | 52.70                     | 98.30                                       | 87.00                                        |
| B105-Blood     | 55.89                     | 98.40                                       | 88.20                                        |
| B105-Tumor     | 51.61                     | 98.40                                       | 87.40                                        |
| B106-Blood     | 90.08                     | 99.00                                       | 93.00                                        |
| B106-Tumor     | 68.26                     | 98.60                                       | 90.70                                        |
| B107-Blood     | 103.13                    | 98.90                                       | 93.10                                        |
| B107-Tumor     | 77.70                     | 98.50                                       | 90.50                                        |
| B109-Blood     | 71.35                     | 98.70                                       | 90.80                                        |
| B109-Tumor     | 89.32                     | 98.90                                       | 92.50                                        |
| B110-Blood     | 73.66                     | 98.80                                       | 91.20                                        |
| B110-Tumor     | 68.96                     | 98.70                                       | 90.90                                        |
| B111-Blood     | 89.79                     | 98.80                                       | 92.50                                        |
| B111-Tumor     | 80.75                     | 98.70                                       | 91.40                                        |
| B112-Blood     | 73.74                     | 98.60                                       | 90.70                                        |
| B112-Tumor     | 80.97                     | 98.80                                       | 91.80                                        |
| B114-Blood     | 70.71                     | 98.60                                       | 90.40                                        |
| B114-Tumor     | 85.67                     | 98.70                                       | 91.50                                        |
| B14-Blood      | 80.89                     | 98.60                                       | 90.50                                        |
| B14-Tumor      | 66.83                     | 98.30                                       | 89.10                                        |
| B16-Blood      | 70.63                     | 98.60                                       | 90.20                                        |
| B16-Tumor      | 88.44                     | 98.80                                       | 91.80                                        |
| B18-Blood      | 161.04                    | 99.20                                       | 95.10                                        |
| B18-Tumor      | 70.14                     | 98.70                                       | 90.40                                        |
| B21-Blood      | 77.68                     | 98.80                                       | 91.80                                        |
| B21-Tumor      | 89.99                     | 98.40                                       | 90.70                                        |
| B22-Blood      | 73.22                     | 98.20                                       | 89.00                                        |
| B22-Tumor      | 73.54                     | 98.20                                       | 88.80                                        |
| B23-Blood      | 100.74                    | 98.60                                       | 91.60                                        |
| B23-Tumor      | 69.46                     | 98.20                                       | 88.50                                        |
| B24-Blood      | 87.45                     | 98.50                                       | 91.10                                        |
| B24-Tumor      | 71.99                     | 98.20                                       | 88.80                                        |
| B25-Blood      | 88.98                     | 98.40                                       | 90.60                                        |
| B25-Tumor      | 81.81                     | 98.40                                       | 90.70                                        |
| B34-Blood      | 100.52                    | 98.70                                       | 91.70                                        |
| B34-Tumor      | 87.82                     | 98.70                                       | 91.40                                        |
| B35-Blood      | 71.39                     | 98.50                                       | 89.90                                        |

**Supplementary Table 4 continued. Summary statistics of targeted exon sequencing in the Prevalence Screen.**

| Samples     | Mean fold coverage | % of targets covered by at least 1 × | % of targets covered by at least 10 × |
|-------------|--------------------|--------------------------------------|---------------------------------------|
| B35-Tumor   | 87.56              | 98.60                                | 91.40                                 |
| B36-Blood   | 66.82              | 98.40                                | 89.50                                 |
| B36-Tumor   | 66.73              | 98.10                                | 87.80                                 |
| B37-Blood   | 95.04              | 98.80                                | 92.10                                 |
| B37-Tumor   | 73.89              | 98.60                                | 90.20                                 |
| B41-Blood   | 74.22              | 98.40                                | 89.40                                 |
| B41-Tumor   | 68.93              | 98.50                                | 89.70                                 |
| B43-Blood   | 78.58              | 98.10                                | 89.40                                 |
| B43-Tumor   | 67.29              | 98.30                                | 88.90                                 |
| B45-Blood   | 92.79              | 98.40                                | 91.60                                 |
| B45-Tumor   | 71.77              | 98.50                                | 90.10                                 |
| B47-Blood   | 73.72              | 98.00                                | 88.90                                 |
| B47-Tumor   | 69.51              | 97.90                                | 88.20                                 |
| B50-Blood   | 71.37              | 98.00                                | 88.30                                 |
| B50-Tumor   | 63.27              | 97.70                                | 86.60                                 |
| B52-Blood   | 114.46             | 98.60                                | 92.50                                 |
| B52-Tumor   | 74.48              | 98.10                                | 88.80                                 |
| B54-Blood   | 119.73             | 98.80                                | 93.30                                 |
| B54-Tumor   | 74.94              | 98.60                                | 90.10                                 |
| B55-Blood   | 72.54              | 98.00                                | 88.50                                 |
| B55-Tumor   | 66.30              | 98.00                                | 88.50                                 |
| B56-Blood   | 67.23              | 98.20                                | 90.20                                 |
| B56-Tumor   | 69.97              | 98.40                                | 90.20                                 |
| B57-Blood   | 77.74              | 98.10                                | 89.30                                 |
| B57-Tumor   | 102.86             | 98.70                                | 92.40                                 |
| B59-0-Blood | 161.32             | 99.10                                | 95.60                                 |
| B59-0-Tumor | 62.39              | 98.60                                | 90.60                                 |
| B59-1-Blood | 152.60             | 99.10                                | 95.00                                 |
| B59-1-Tumor | 59.31              | 98.20                                | 88.50                                 |
| B59-3-Blood | 73.21              | 98.60                                | 90.80                                 |
| B59-3-Tumor | 113.12             | 99.00                                | 93.60                                 |
| B59-Blood   | 157.01             | 98.70                                | 94.00                                 |
| B59-Tumor   | 74.29              | 98.30                                | 89.80                                 |
| B60-Blood   | 112.02             | 98.70                                | 92.80                                 |
| B60-Tumor   | 64.50              | 98.10                                | 88.30                                 |
| B61-Blood   | 66.60              | 97.70                                | 86.80                                 |
| B61-Tumor   | 144.84             | 98.80                                | 94.20                                 |
| B62-0-Blood | 68.56              | 98.30                                | 90.00                                 |
| B62-0-Tumor | 64.13              | 98.40                                | 89.80                                 |
| B63-Blood   | 70.31              | 98.30                                | 89.00                                 |
| B63-Tumor   | 88.81              | 98.30                                | 90.50                                 |
| B64-Blood   | 68.27              | 98.10                                | 88.00                                 |
| B64-Tumor   | 80.44              | 98.40                                | 89.80                                 |
| B65-Blood   | 65.12              | 98.30                                | 88.70                                 |
| B65-Tumor   | 70.31              | 98.30                                | 88.90                                 |
| B66-0-Blood | 85.78              | 98.50                                | 91.20                                 |
| B66-0-Tumor | 64.81              | 98.00                                | 88.30                                 |
| B66-Blood   | 80.51              | 98.30                                | 89.50                                 |
| B66-Tumor   | 68.33              | 98.20                                | 88.80                                 |
| B68-Blood   | 73.17              | 98.40                                | 90.30                                 |
| B68-Tumor   | 77.53              | 98.30                                | 89.60                                 |
| B69-Blood   | 65.11              | 98.30                                | 88.90                                 |
| B69-Tumor   | 134.84             | 99.00                                | 94.00                                 |
| B70-Blood   | 63.22              | 98.60                                | 89.80                                 |
| B70-Tumor   | 140.89             | 99.00                                | 94.60                                 |

**Supplementary Table 4 continued. Summary statistics of targeted exon sequencing in the Prevalence Screen.**

| Samples      | Mean fold coverage | % of targets covered by at least 1 × | % of targets covered by at least 10 × |
|--------------|--------------------|--------------------------------------|---------------------------------------|
| B71-Blood    | 76.27              | 98.30                                | 89.00                                 |
| B71-Tumor    | 134.06             | 98.70                                | 93.20                                 |
| B73-Blood    | 81.58              | 98.60                                | 90.80                                 |
| B73-Tumor    | 63.59              | 98.30                                | 88.70                                 |
| B74-Blood    | 70.81              | 98.30                                | 89.00                                 |
| B74-Tumor    | 65.80              | 98.20                                | 88.30                                 |
| B77-Blood    | 54.31              | 97.70                                | 85.50                                 |
| B77-Tumor    | 50.83              | 97.70                                | 84.70                                 |
| B78-Blood    | 66.40              | 98.40                                | 89.20                                 |
| B78-Tumor    | 86.10              | 98.60                                | 90.80                                 |
| B79-Blood    | 71.95              | 98.60                                | 90.20                                 |
| B79-Tumor    | 99.20              | 98.70                                | 92.00                                 |
| B80-0-Blood  | 71.49              | 98.80                                | 90.90                                 |
| B80-0-Tumor  | 79.25              | 98.70                                | 90.80                                 |
| B80-11-Blood | 83.84              | 98.80                                | 91.60                                 |
| B80-11-Tumor | 67.23              | 98.70                                | 90.10                                 |
| B80-13-Blood | 68.54              | 98.50                                | 89.50                                 |
| B80-13-Tumor | 65.88              | 98.60                                | 89.80                                 |
| B80-3-Blood  | 80.81              | 98.60                                | 90.80                                 |
| B80-3-Tumor  | 76.28              | 98.60                                | 90.80                                 |
| B80-4-Blood  | 111.78             | 98.90                                | 93.30                                 |
| B80-4-Tumor  | 68.52              | 98.50                                | 89.60                                 |
| B80-7-Blood  | 66.39              | 98.50                                | 89.70                                 |
| B80-7-Tumor  | 66.72              | 98.50                                | 89.70                                 |
| B80-8-Blood  | 67.69              | 98.50                                | 89.70                                 |
| B80-8-Tumor  | 93.87              | 98.70                                | 91.70                                 |
| B80-Blood    | 92.71              | 98.70                                | 91.50                                 |
| B80-Tumor    | 68.44              | 98.50                                | 89.30                                 |
| B81-1-Blood  | 88.55              | 98.60                                | 91.50                                 |
| B81-1-Tumor  | 66.59              | 98.40                                | 89.10                                 |
| B81-Blood    | 66.10              | 98.00                                | 87.50                                 |
| B81-Tumor    | 83.15              | 98.70                                | 91.10                                 |
| B82-Blood    | 67.85              | 98.30                                | 89.10                                 |
| B82-Tumor    | 86.58              | 98.80                                | 91.60                                 |
| B83-Blood    | 64.05              | 97.90                                | 87.70                                 |
| B83-Tumor    | 70.15              | 98.20                                | 89.20                                 |
| B84-Blood    | 77.13              | 98.80                                | 91.60                                 |
| B84-Tumor    | 64.66              | 98.60                                | 89.90                                 |
| B85-0-Blood  | 64.76              | 98.50                                | 89.70                                 |
| B85-0-Tumor  | 100.75             | 99.00                                | 93.20                                 |
| B85-2-Blood  | 65.94              | 98.50                                | 89.40                                 |
| B85-2-Tumor  | 116.63             | 99.00                                | 93.60                                 |
| B86-Blood    | 80.69              | 98.30                                | 89.20                                 |
| B86-Tumor    | 69.05              | 98.20                                | 87.80                                 |
| B87-Blood    | 69.96              | 98.20                                | 88.90                                 |
| B87-Tumor    | 84.81              | 98.70                                | 91.60                                 |
| B88-Blood    | 65.53              | 98.40                                | 89.50                                 |
| B88-Tumor    | 76.85              | 98.60                                | 90.90                                 |
| B89-10-Blood | 67.87              | 98.30                                | 89.00                                 |
| B89-10-Tumor | 87.55              | 98.70                                | 92.10                                 |
| B89-12-Blood | 67.10              | 98.40                                | 89.70                                 |
| B89-12-Tumor | 68.78              | 98.20                                | 89.00                                 |
| B89-16-Blood | 51.20              | 97.30                                | 85.00                                 |
| B89-16-Tumor | 52.35              | 97.50                                | 85.10                                 |
| B89-1-Blood  | 66.91              | 98.20                                | 89.70                                 |

**Supplementary Table 4 continued. Summary statistics of targeted exon sequencing in the Prevalence Screen.**

| <b>Samples</b> | <b>Mean fold coverage</b> | <b>% of targets covered by at least 1 ×</b> | <b>% of targets covered by at least 10 ×</b> |
|----------------|---------------------------|---------------------------------------------|----------------------------------------------|
| B89-1-Tumor    | 75.94                     | 98.50                                       | 90.60                                        |
| B89-3-Blood    | 70.57                     | 98.60                                       | 90.40                                        |
| B89-3-Tumor    | 99.29                     | 98.80                                       | 92.30                                        |
| B89-4-Blood    | 96.90                     | 98.60                                       | 91.80                                        |
| B89-4-Tumor    | 69.27                     | 98.40                                       | 89.70                                        |
| B89-5-Blood    | 64.85                     | 97.90                                       | 87.60                                        |
| B89-5-Tumor    | 75.06                     | 98.20                                       | 89.10                                        |
| B90-Blood      | 66.74                     | 98.40                                       | 89.40                                        |
| B90-Tumor      | 101.38                    | 98.80                                       | 92.70                                        |
| B96-Blood      | 116.87                    | 99.10                                       | 94.10                                        |
| B96-Tumor      | 76.11                     | 98.70                                       | 90.90                                        |
| B98-Blood      | 80.45                     | 98.70                                       | 91.30                                        |
| B98-Tumor      | 69.43                     | 98.50                                       | 90.20                                        |
| B99-Blood      | 83.78                     | 98.50                                       | 91.70                                        |
| B99-Tumor      | 216.59                    | 99.20                                       | 95.80                                        |

Reads were aligned to the hg18 UCSC release of the human genome.

**Supplementary Table 5. A list of all confirmed somatic mutations detected in the 97 TCCs.**

| Gene Symbol | Tumor ID | Nucleotide (genomic)#                                                 | Nucleotide (cDNA)\$                                           | Codon change | Amino acid change | Amino acid (protein)§ | Mutation Type     |
|-------------|----------|-----------------------------------------------------------------------|---------------------------------------------------------------|--------------|-------------------|-----------------------|-------------------|
| ABCA4       | B8       | g.chr1:94351206C>T                                                    | c.71G>A                                                       | CGC=>CAC     | Arg=>His          | p.R24H                | missense          |
| ACAD10      | B69      | g.chr12:110652016C>T                                                  | c.1267C>T                                                     | CGA=>TGA     | Arg=>Stop         | p.R423*               | nonsense          |
| ACAD10      | B81-1    | g.chr12:110624480A>T                                                  | c.319A>T                                                      | AGA=>TGA     | Arg=>Stop         | p.R107*               | nonsense          |
| ADAMTSL3    | B5       | g.chr15:82491167C>G                                                   | c.4733C>G                                                     | TCC=>TGC     | Ser=>Cys          | p.S1578C              | missense          |
| ADAMTSL3    | B79      | g.chr15:82442799C>T                                                   | c.3415C>T                                                     | CGG=>TGG     | Arg=>Trp          | p.R1139W              | missense          |
| ADAMTSL3    | B83      | g.chr15:82383690A>G                                                   | c.2018A>G                                                     | CAT=>CGT     | His=>Arg          | p.H673R               | missense          |
| ADCY2       | B106     | g.chr5:7842879C>G                                                     | c.2594C>G                                                     | GCT=>GGT     | Ala=>Gly          | p.A865G               | missense          |
| ADCY2       | B36      | g.chr5:7879853G>A                                                     | c.3145G>A                                                     | GTC=>ATC     | Val=>Ile          | p.V1049I              | missense          |
| ADCY2       | B5       | g.chr5:7762361G>A                                                     | c.1439G>A                                                     | CGC=>CAC     | Arg=>His          | p.R480H               | missense          |
| ADCY2       | B69      | g.chr5:7855442C>T                                                     | c.2740C>T                                                     | CGG=>TGG     | Arg=>Trp          | p.R914W               | missense          |
| ALDH1B1     | B15      | g.chr9:38386397G>T                                                    | c.652G>T                                                      | GCC=>TCC     | Ala=>Ser          | p.A218S               | missense          |
| ALOX12      | B13      | g.chr17:6842847A>C                                                    | c.509A>C                                                      | AAG=>ACG     | Lys=>Thr          | p.K170T               | missense          |
| ALS2CR11    | B35      | g.chr2:202155089G>A                                                   | c.613C>T                                                      | CAG=>TAG     | Gln=>Stop         | p.Q205*               | nonsense          |
| ALS2CR11    | B5       | g.chr2:202144928C>T                                                   | c.814G>A                                                      | GAA=>AAA     | Glu=>Lys          | p.E272K               | missense          |
| ALS2CR11    | B59-3    | g.chr2:202109244C>G                                                   | c.1251G>C                                                     | TTG=>TTC     | Leu=>Phe          | p.L417F               | missense          |
| ANK2        | B10      | g.chr4:114494501G>A                                                   | c.5278G>A                                                     | GAA=>AAA     | Glu=>Lys          | p.E1760K              | missense          |
| ANK2        | B65      | g.chr4:114497630G>A                                                   | c.8407G>A                                                     | GAA=>AAA     | Glu=>Lys          | p.E2803K              | missense          |
| ANK2        | B69      | g.chr4:114508384T>C                                                   | c.11246T>C                                                    | GTT=>GCT     | Val=>Ala          | p.V3749A              | missense          |
| ANK2        | B70      | g.chr4:114494287G>C                                                   | c.5064G>C                                                     | CAG=>CAC     | Gln=>His          | p.Q1688H              | missense          |
| ANK2        | B83      | g.chr4:114494249G>A                                                   | c.5026G>A                                                     | GAA=>AAA     | Glu=>Lys          | p.E1676K              | missense          |
| ANK2        | B85-0    | g.chr4:114382734C>T                                                   | c.811C>T                                                      | CAT=>TAT     | His=>Tyr          | p.H271Y               | missense          |
| ANK2        | B89-4    | g.chr4:114494679C>T                                                   | c.5456C>T                                                     | GCG=>GTG     | Ala=>Val          | p.A1819V              | missense          |
| ANK3        | B10      | g.chr10:61544007G>A                                                   | c.2930C>T                                                     | TCA=>TTA     | Ser=>Leu          | p.S977L               | missense          |
| ANK3        | B65      | g.chr10:61503559C>G                                                   | c.7086G>C                                                     | CAG=>CAC     | Gln=>His          | p.Q2362H              | missense          |
| ANK3        | B71      | g.chr10:61504958G>C                                                   | c.5687C>G                                                     | TCT=>TGT     | Ser=>Cys          | p.S1896C              | missense          |
| ANK3        | B85-0    | g.chr10:61516453A>G                                                   | c.3736T>C                                                     | TGT=>CGT     | Cys=>Arg          | p.C1246R              | missense          |
| ANK3        | B89-4    | g.chr10:61709388T>A                                                   | c.130A>T                                                      | AGT=>TGT     | Ser=>Cys          | p.S44C                | missense          |
| ANO5        | B5       | g.chr11:22248513G>A                                                   | c.1978G>A                                                     | GAC=>AAC     | Asp=>Asn          | p.D660N               | missense          |
| ANO7        | B15      | g.chr2:241779331C>A                                                   | c.320C>A                                                      | CCC=>CAC     | Pro=>His          | p.P107H               | missense          |
| ANPEP       | B15      | g.chr15:88145685C>T                                                   | c.1727G>A                                                     | CGC=>CAC     | Arg=>His          | p.R576H               | missense          |
| AOAH        | B8       | g.chr7:36546519C>T                                                    | c.1237G>A                                                     | GTT=>ATT     | Val=>Ile          | p.V413I               | missense          |
| AP2B1       | B5       | g.chr17:31001755G>C                                                   | c.1630G>C                                                     | GAG=>CAG     | Glu=>Gln          | p.E544Q               | missense          |
| ARHGAP28    | B10      | g.chr18:6866166G>T                                                    | c.772G>T                                                      | GAA=>TAA     | Glu=>Stop         | p.E258*               | nonsense          |
| ARID1A      | B13      | g.chr1:26966872_26966872delC                                          | c.2994_2994delC                                               | -            | -                 | -                     | Frame shift indel |
| ARID1A      | B13      | g.chr1:26978951C>G                                                    | c.5975C>G                                                     | TCA=>TGA     | Ser=>Stop         | p.S1992*              | nonsense          |
| ARID1A      | B13      | g.chr1:26979357C>G                                                    | c.6381C>G                                                     | ATC=>ATG     | Ile=>Met          | p.I2127M              | missense          |
| ARID1A      | B13      | g.chr1:26979782C>T                                                    | c.6806C>T                                                     | TCA=>TTA     | Ser=>Leu          | p.S2269L              | missense          |
| ARID1A      | B24      | g.chr1:26962263C>T                                                    | c.2632C>T                                                     | CAG=>TAG     | Gln=>Stop         | p.Q878*               | nonsense          |
| ARID1A      | B35      | g.chr1:26971984C>T                                                    | c.3634C>T                                                     | CAG=>TAG     | Gln=>Stop         | p.Q1212*              | nonsense          |
| ARID1A      | B37      | g.chr1:26978314G>T                                                    | c.5338G>T                                                     | GAA=>TAA     | Glu=>Stop         | p.E1780*              | nonsense          |
| ARID1A      | B37      | g.chr1:26978674G>A                                                    | c.5698G>A                                                     | GAT=>AAT     | Asp=>Asn          | p.D1900N              | missense          |
| ARID1A      | B47      | g.chr1:26978197C>T                                                    | c.5221C>T                                                     | CAG=>TAG     | Gln=>Stop         | p.Q1741*              | nonsense          |
| ARID1A      | B5       | g.chr1:26971940C>G                                                    | c.3590C>G                                                     | TCC=>TGC     | Ser=>Cys          | p.S1197C              | missense          |
| ARID1A      | B5       | g.chr1:26972451C>A                                                    | c.3743C>A                                                     | TCA=>TAA     | Ser=>Stop         | p.S1248*              | nonsense          |
| ARID1A      | B52      | g.chr1:26978192_26978225delCAGGACAGAGAA<br>CGCTACTGGATCCTGG<br>GAGGTT | c.1643_1676delCA<br>GGACAGAGAAAC<br>GCTACTGGATCC<br>TGGGAGGTT | -            | -                 | -                     | Frame shift indel |
| ARID1A      | B60      | g.chr1:26974055C>T                                                    | c.4750C>T                                                     | CAG=>TAG     | Gln=>Stop         | p.Q1584*              | nonsense          |
| ARID1A      | B71      | g.chr1:26931800C>G                                                    | c.1850C>G                                                     | TCA=>TGA     | Ser=>Stop         | p.S617*               | nonsense          |
| ARID1A      | B79      | g.chr1:26974670G>A                                                    | c.5009G>A                                                     | TGG=>TAG     | Trp=>Stop         | p.W1670*              | nonsense          |

**Supplementary Table 5 continued. A list of all confirmed somatic mutations detected in the 97 TCCs.**

| Gene Symbol | Tumor ID | Nucleotide (genomic)#        | Nucleotide (cDNA)\$ | Codon change | Amino acid change | Amino acid (protein) § | Mutation Type     |
|-------------|----------|------------------------------|---------------------|--------------|-------------------|------------------------|-------------------|
| ARID1A      | B85-0    | g.chr1:26978582_26978582delG | c.1253_1253delG     | -            | -                 | -                      | Frame shift indel |
| ARID1A      | B85-2    | g.chr1:26973782C>T           | c.4477C>T           | CAG=>TAG     | Gln=>Stop         | p.Q1493*               | nonsense          |
| ARID1A      | B90      | g.chr1:26931847C>T           | c.1897C>T           | CAG=>TAG     | Gln=>Stop         | p.Q633*                | nonsense          |
| ASB15       | B13      | g.chr7:123056623G>C          | c.1339G>C           | GAC=>CAC     | Asp=>His          | p.D447H                | missense          |
| ATG2B       | B5       | g.chr14:95839211C>T          | c.4977G>A           | ATG=>ATA     | Met=>Ile          | p.M1659I               | missense          |
| ATG2B       | B65      | g.chr14:95839158G>A          | c.5030C>T           | TCC=>TTC     | Ser=>Phe          | p.S1677F               | missense          |
| ATG2B       | B69      | g.chr14:95821862G>A          | c.6220C>T           | CGC=>TGC     | Arg=>Cys          | p.R2074C               | missense          |
| ATG2B       | B69      | g.chr14:95826624G>A          | c.5758C>T           | CGC=>TGC     | Arg=>Cys          | p.R1920C               | missense          |
| ATG2B       | B89-16   | g.chr14:95828189C>G          | -                   | -            | -                 | -                      | spliceSite        |
| ATP5C1      | B10      | g.chr10:7881856G>A           | c.544G>A            | GAA=>AAA     | Glu=>Lys          | p.E182K                | missense          |
| ATP8A1      | B10      | g.chr4:42312812G>A           | c.404C>T            | ACG=>ATG     | Thr=>Met          | p.T135M                | missense          |
| ATP8A1      | B74      | g.chr4:42276655A>G           | c.932T>C            | GTC=>GCC     | Val=>Ala          | p.V311A                | missense          |
| ATP8A1      | B89-12   | g.chr4:42152142T>C           | c.2746A>G           | AGA=>GGA     | Arg=>Gly          | p.R916G                | missense          |
| AVL9        | B10      | g.chr7:32565266G>A           | c.880G>A            | GAG=>AAG     | Glu=>Lys          | p.E294K                | missense          |
| AVL9        | B35      | g.chr7:32576277G>A           | c.1336G>A           | GAT=>AAT     | Asp=>Asn          | p.D446N                | missense          |
| BAI3        | B15      | g.chr6:70155325G>A           | c.4390G>A           | GCA=>ACA     | Ala=>Thr          | p.A1464T               | missense          |
| BAI3        | B69      | g.chr6:70127703G>C           | c.3817G>C           | GAA=>CAA     | Glu=>Gln          | p.E1273Q               | missense          |
| BAI3        | B98      | g.chr6:70122468G>A           | c.3590G>A           | CGA=>CAA     | Arg=>Gln          | p.R1197Q               | missense          |
| BRIP1       | B36      | g.chr17:57281349C>T          | c.430G>A            | GCA=>ACA     | Ala=>Thr          | p.A144T                | missense          |
| BRIP1       | B54      | g.chr17:57212541A>G          | c.1798T>C           | TTT=>CTT     | Phe=>Leu          | p.F600L                | missense          |
| BRIP1       | B8       | g.chr17:57231267C>T          | c.1316G>A           | CGA=>CAA     | Arg=>Gln          | p.R439Q                | missense          |
| BRPF1       | B10      | g.chr3:9761820G>A            | c.3049G>A           | GCT=>ACT     | Ala=>Thr          | p.A1017T               | missense          |
| BRPF1       | B89-10   | g.chr3:9763006G>A            | c.3347G>A           | CGA=>CAA     | Arg=>Gln          | p.R1116Q               | missense          |
| BTA1        | B10      | g.chr10:93768659C>G          | c.4850C>G           | TCA=>TGA     | Ser=>Stop         | p.S1617*               | nonsense          |
| BTA1        | B106     | g.chr10:9373969C>G           | c.2255C>G           | CCG=>CGG     | Pro=>Arg          | p.P752R                | missense          |
| BTA1        | B22      | g.chr10:93713895C>T          | c.1486C>T           | CTC=>TTC     | Leu=>Phe          | p.L496F                | missense          |
| C10orf137   | B5       | g.chr10:127414386A>T         | c.1579A>T           | AGC=>TGC     | Ser=>Cys          | p.S527C                | missense          |
| C10orf137   | B65      | g.chr10:127403965A>G         | c.599A>G            | TAT=>TGT     | Tyr=>Cys          | p.Y200C                | missense          |
| C10orf137   | B71      | g.chr10:127424303G>A         | c.2526G>A           | TGG=>TGA     | Trp=>Stop         | p.W842*                | nonsense          |
| C14orf101   | B15      | g.chr14:56155131G>A          | c.1123G>A           | GTT=>ATT     | Val=>Ile          | p.V375I                | missense          |
| C15orf55    | B106     | g.chr15:32427855C>A          | c.410C>A            | TCT=>TAT     | Ser=>Tyr          | p.S137Y                | missense          |
| C15orf55    | B65      | g.chr15:32435866G>A          | c.2281G>A           | GGA=>AGA     | Gly=>Arg          | p.G761R                | missense          |
| C17orf80    | B15      | g.chr17:68743656C>G          | c.440C>G            | TCT=>TGT     | Ser=>Cys          | p.S147C                | missense          |
| C17orf80    | B86      | g.chr17:68743901C>T          | c.685C>T            | CAT=>TAT     | His=>Tyr          | p.H229Y                | missense          |
| C19orf15    | B10      | g.chr19:43542984G>A          | c.544G>A            | GAG=>AAG     | Glu=>Lys          | p.E182K                | missense          |
| C19orf15    | B77      | g.chr19:43539321A>T          | c.215A>T            | CAG=>CTG     | Gln=>Leu          | p.Q72L                 | missense          |
| C1orf101    | B5       | g.chr1:242821652G>C          | c.2185G>C           | GAA=>CAA     | Glu=>Gln          | p.E729Q                | missense          |
| C1orf101    | B69      | g.chr1:242790806G>A          | c.1243G>A           | GTC=>ATC     | Val=>Ile          | p.V415I                | missense          |
| C1orf101    | B86      | g.chr1:242818457A>T          | c.2136A>T           | AAA=>AAT     | Lys=>Asn          | p.K712N                | missense          |
| C1orf106    | B63      | g.chr1:199144480G>A          | -                   | -            | -                 | -                      | spliceSite        |
| C20orf72    | B50      | g.chr20:17916910C>A          | c.833C>A            | GCC=>GAC     | Ala=>Asp          | p.A278D                | missense          |
| C4orf17     | B105-0   | g.chr4:100670007G>A          | c.415G>A            | GCC=>ACC     | Ala=>Thr          | p.A139T                | missense          |
| C4orf17     | B9       | g.chr4:100662853C>G          | c.301C>G            | CCA=>GCA     | Pro=>Ala          | p.P101A                | missense          |
| C8orf76     | B35      | g.chr8:124313088T>C          | c.448A>G            | ATT=>GTT     | Ile=>Val          | p.I150V                | missense          |
| C8orf76     | B69      | g.chr8:124308018G>A          | c.851C>T            | TCG=>TTG     | Ser=>Leu          | p.S284L                | missense          |
| C9orf102    | B15      | g.chr9:97717875G>A           | c.926G>A            | GGC=>GAC     | Gly=>Asp          | p.G309D                | missense          |
| CANX        | B14      | g.chr5:179082463A>G          | c.1235A>G           | GAA=>GGA     | Glu=>Gly          | p.E412G                | missense          |
| CANX        | B8       | g.chr5:179082462G>C          | c.1234G>C           | GAA=>CAA     | Glu=>Gln          | p.E412Q                | missense          |
| CCDC111     | B5       | g.chr4:185843642A>T          | c.1182A>T           | AAA=>AAT     | Lys=>Asn          | p.K394N                | missense          |
| CCDC111     | B65      | g.chr4:185836533G>A          | c.998G>A            | AGC=>AAC     | Ser=>Asn          | p.S333N                | missense          |
| CD1C        | B8       | g.chr1:156529060C>G          | c.661C>G            | CTG=>GTG     | Leu=>Val          | p.L221V                | missense          |
| CD86        | B10      | g.chr3:123321057G>A          | c.976G>A            | GAT=>AAT     | Asp=>Asn          | p.D326N                | missense          |
| CD86        | B96      | g.chr3:123305118C>T          | c.134C>T            | TCT=>TTT     | Ser=>Phe          | p.S45F                 | missense          |
| CDH5        | B22      | g.chr16:64970913G>A          | c.172G>A            | GAA=>AAA     | Glu=>Lys          | p.E58K                 | missense          |

**Supplementary Table 5 continued. A list of all confirmed somatic mutations detected in the 97 TCCs.**

| Gene Symbol | Tumor ID | Nucleotide (genomic)#          | Nucleotide (cDNA)\$ | Codon change | Amino acid change | Amino acid (protein) § | Mutation Type     |
|-------------|----------|--------------------------------|---------------------|--------------|-------------------|------------------------|-------------------|
| CDH5        | B8       | g.chr16:64978229G>C            | c.227G>C            | AGT=>ACT     | Ser=>Thr          | p.S76T                 | missense          |
| CDKN1A      | B13      | g.chr6:36760042insT            | c.186insT           | -            | -                 | -                      | Frame shift indel |
| CDKN1A      | B15      | g.chr6:36760002G>A             | c.146G>A            | TGG=>TAG     | Trp=>Stop         | p.W49*                 | nonsense          |
| CEP135      | B22      | g.chr4:56532274C>T             | c.1192C>T           | CAG=>TAG     | Gln=>Stop         | p.Q398*                | nonsense          |
| CEP135      | B9       | g.chr4:56541102G>C             | c.1510G>C           | GAA=>CAA     | Glu=>Gln          | p.E504Q                | missense          |
| CHD6        | B35      | g.chr20:39488150C>A            | c.4126G>T           | GCA=>TCA     | Ala=>Ser          | p.A1376S               | missense          |
| CHD6        | B36      | g.chr20:39550622C>T            | c.1717G>A           | GTC=>ATC     | Val=>Ile          | p.V573I                | missense          |
| CHD6        | B55      | g.chr20:39478647G>T            | c.6481C>A           | CAC=>AAC     | His=>Asn          | p.H2161N               | missense          |
| CHD6        | B59-3    | g.chr20:39474294C>G            | c.7155G>C           | CAG=>CAC     | Gln=>His          | p.Q2385H               | missense          |
| CHD6        | B65      | g.chr20:39549856T>A            | c.1864A>T           | AAA=>TAA     | Lys=>Stop         | p.K622*                | nonsense          |
| CHD6        | B69      | g.chr20:39513999C>T            | c.3404G>A           | CGT=>CAT     | Arg=>His          | p.R1135H               | missense          |
| CHD6        | B89-4    | g.chr20:39595593G>A            | c.64C>T             | CCA=>TCA     | Pro=>Ser          | p.P22S                 | missense          |
| CHRD        | B13      | g.chr3:185583853G>A            | c.1273G>A           | GGC=>AGC     | Gly=>Ser          | p.G425S                | missense          |
| CLSPN       | B15      | g.chr1:35986760C>G             | c.2305G>C           | GAG=>CAG     | Glu=>Gln          | p.E769Q                | missense          |
| CLSPN       | B79      | g.chr1:35975175T>A             | c.3836A>T           | AAT=>ATT     | Asn=>Ile          | p.N1279I               | missense          |
| CLSPN       | B89-4    | g.chr1:36002674T>A             | c.362A>T            | CAG=>CTG     | Gln=>Leu          | p.Q121L                | missense          |
| CNTNAP2     | B8       | g.chr7:146460373C>T            | c.1187C>T           | TCA=>TTA     | Ser=>Leu          | p.S396L                | missense          |
| COL3A1      | B10      | g.chr2:189583277G>T            | c.3952G>T           | GAT=>TAT     | Asp=>Tyr          | p.D1318Y               | missense          |
| COL3A1      | B10      | g.chr2:189583646G>A            | c.4039G>A           | GAA=>AAA     | Glu=>Lys          | p.E1347K               | missense          |
| COL3A1      | B59-3    | g.chr2:189557778G>C            | c.127G>C            | GAT=>CAT     | Asp=>His          | p.D43H                 | missense          |
| CREB3L2     | B106     | g.chr7:137217719A>G            | c.1466T>C           | CTT=>CCT     | Leu=>Pro          | p.L489P                | missense          |
| CREBBP      | B105     | g.chr16:3747903G>A             | c.3517C>T           | CGA=>TGA     | Arg=>Stop         | p.R1173*               | nonsense          |
| CREBBP      | B109     | g.chr16:3728619G>C             | c.4336C>G           | CGC=>GGC     | Arg=>Gly          | p.R1446G               | missense          |
| CREBBP      | B110     | g.chr16:3840811G>A             | c.286C>T            | CAG=>TAG     | Gln=>Stop         | p.Q96*                 | nonsense          |
| CREBBP      | B13      | g.chr16:3735319G>A             | c.3874C>T           | CAG=>TAG     | Gln=>Stop         | p.Q1292*               | nonsense          |
| CREBBP      | B37      | g.chr16:3840787G>A             | c.310C>T            | CAA=>TAA     | Gln=>Stop         | p.Q104*                | nonsense          |
| CREBBP      | B5       | g.chr16:3783541G>A             | c.1063C>T           | CAG=>TAG     | Gln=>Stop         | p.Q355*                | nonsense          |
| CREBBP      | B59      | g.chr16:3757755G>A             | c.3217C>T           | CAG=>TAG     | Gln=>Stop         | p.Q1073*               | nonsense          |
| CREBBP      | B62-0    | g.chr16:3748902G>T             | c.3323C>A           | TCA=>TAA     | Ser=>Stop         | p.S1108*               | nonsense          |
| CREBBP      | B63      | g.chr16:3726706C>A             | c.4506G>T           | TGG=>TGT     | Trp=>Cys          | p.W1502C               | missense          |
| CREBBP      | B66      | g.chr16:3718066G>A             | c.6983C>T           | TCG=>TTG     | Ser=>Leu          | p.S2328L               | missense          |
| CREBBP      | B66      | g.chr16:3747299T>C             | c.3689A>G           | TAT=>TGT     | Tyr=>Cys          | p.Y1230C               | missense          |
| CREBBP      | B80-13   | g.chr16:3760937G>A             | c.2515C>T           | CAG=>TAG     | Gln=>Stop         | p.Q839*                | nonsense          |
| CREBBP      | B89-1    | g.chr16:3768750_3768753delGGCT | c.1894_1897delGGCT  | -            | -                 | -                      | Frame shift indel |
| CREBBP      | B89-4    | g.chr16:3741727C>A             | -                   | -            | -                 | -                      | spliceSite        |
| CREBBP      | B89-4    | g.chr16:3782055T>A             | c.1258A>T           | AAG=>TAG     | Lys=>Stop         | p.K420*                | nonsense          |
| CRNKL1      | B10      | g.chr20:19968414C>G            | c.1867G>C           | GAC=>CAC     | Asp=>His          | p.D623H                | missense          |
| CRNKL1      | B109     | g.chr20:19976490C>G            | c.1024G>C           | GAG=>CAG     | Glu=>Gln          | p.E342Q                | missense          |
| CRNKL1      | B80-8    | g.chr20:19966137C>T            | c.2209G>A           | GAA=>AAA     | Glu=>Lys          | p.E737K                | missense          |
| CUBN        | B36      | g.chr10:17193029C>T            | c.910G>A            | GAA=>AAA     | Glu=>Lys          | p.E304K                | missense          |
| CUBN        | B8       | g.chr10:16997052C>T            | c.7336G>A           | GAA=>AAA     | Glu=>Lys          | p.E2446K               | missense          |
| CUBN        | B90      | g.chr10:17186430G>A            | c.1411C>T           | CAG=>TAG     | Gln=>Stop         | p.Q471*                | nonsense          |
| CUX1        | B36      | g.chr7:101631404G>A            | c.2107G>A           | GAT=>AAT     | Asp=>Asn          | p.D703N                | missense          |
| CYP1A1      | B10      | g.chr15:72802398G>C            | c.94C>G             | CAG=>GAG     | Gln=>Glu          | p.Q32E                 | missense          |
| CYTSB       | B5       | g.chr17:20049276A>T            | c.1322A>T           | GAG=>GTG     | Glu=>Val          | p.E441V                | missense          |
| CYTSB       | B80      | g.chr17:20048706A>T            | c.752A>T            | AAG=>ATG     | Lys=>Met          | p.K251M                | missense          |
| DDRKG1      | B5       | g.chr20:3131972C>A             | c.182G>T            | GGA=>GTA     | Gly=>Val          | p.G61V                 | missense          |
| DGKH        | B13      | g.chr13:41687733C>G            | c.3143C>G           | ACT=>AGT     | Thr=>Ser          | p.T1048S               | missense          |
| DIP2C       | B15      | g.chr10:400450C>A              | c.2341G>T           | GTG=>TTG     | Val=>Leu          | p.V781L                | missense          |
| DIP2C       | B21      | g.chr10:423696C>T              | c.1651G>A           | GGC=>AGC     | Gly=>Ser          | p.G551S                | missense          |
| DIP2C       | B34      | g.chr10:449960G>T              | c.950C>A            | CCG=>CAG     | Pro=>Gln          | p.P317Q                | missense          |
| DISP1       | B10      | g.chr1:221243646G>C            | c.2284G>C           | GAG=>CAG     | Glu=>Gln          | p.E762Q                | missense          |
| DISP1       | B22      | g.chr1:221244930G>C            | c.3568G>C           | GAG=>CAG     | Glu=>Gln          | p.E1190Q               | missense          |

**Supplementary Table 5 continued. A list of all confirmed somatic mutations detected in the 97 TCCs.**

| Gene Symbol | Tumor ID | Nucleotide (genomic)#                    | Nucleotide (cDNA)\$        | Codon change | Amino acid change | Amino acid (protein) § | Mutation Type     |
|-------------|----------|------------------------------------------|----------------------------|--------------|-------------------|------------------------|-------------------|
| DISP1       | B69      | g.chr1:221244607C>T                      | c.3245C>T                  | GCG=>GTG     | Ala=>Val          | p.A1082V               | missense          |
| DMD         | B15      | g.chrX:31657672G>A                       | c.277C>T                   | CGA=>TGA     | Arg=>Stop         | p.R93*                 | nonsense          |
| DNAH17      | B10      | g.chr17:74077150C>T                      | c.205G>A                   | GAG=>AAG     | Glu=>Lys          | p.E69K                 | missense          |
| DOCK8       | B5       | g.chr9:423939A>T                         | c.4646A>T                  | CAG=>CTG     | Gln=>Leu          | p.Q1549L               | missense          |
| DOCK8       | B85-0    | g.chr9:418491G>A                         | c.4264G>A                  | GCC=>ACC     | Ala=>Thr          | p.A1422T               | missense          |
| EIF2C4      | B55      | g.chr1:36063883C>T                       | c.505C>T                   | CGT=>TGT     | Arg=>Cys          | p.R169C                | missense          |
| EIF2C4      | B85-0    | g.chr1:36070325G>T                       | c.1197G>T                  | GAG=>GAT     | Glu=>Asp          | p.E399D                | missense          |
| EMILIN2     | B89-4    | g.chr18:2881074T>A                       | c.949T>A                   | TAT=>AAT     | Tyr=>Asn          | p.Y317N                | missense          |
| ENO2        | B10      | g.chr12:6899092T>C                       | c.769T>C                   | TAT=>CAT     | Tyr=>His          | p.Y257H                | missense          |
| EP300       | B10      | g.chr22:39875951C>T                      | c.2620C>T                  | CAG=>TAG     | Gln=>Stop         | p.Q874*                | nonsense          |
| EP300       | B106     | g.chr22:39898450A>T                      | c.4454A>T                  | GAT=>GTT     | Asp=>Val          | p.D1485V               | missense          |
| EP300       | B66      | g.chr22:39896441_39896446delCCCAAG       | c.2874_2879delCCCAAG       | -            | -                 | -                      | indel             |
| EP300       | B78      | g.chr22:39875801C>T                      | c.2470C>T                  | CAA=>TAA     | Gln=>Stop         | p.Q824*                | nonsense          |
| EP300       | B80-13   | g.chr22:39899617G>C                      | c.4662G>C                  | AAG=>AAC     | Lys=>Asn          | p.K1554N               | missense          |
| EP300       | B80-4    | g.chr22:39904544C>A                      | c.6883C>A                  | CAA=>AAA     | Gln=>Lys          | p.Q2295K               | missense          |
| EP300       | B80-8    | g.chr22:39843235C>T                      | c.193C>T                   | CAG=>TAG     | Gln=>Stop         | p.Q65*                 | nonsense          |
| EP300       | B86      | g.chr22:39902296C>T                      | c.4879C>T                  | CGG=>TGG     | Arg=>Trp          | p.R1627W               | missense          |
| EP300       | B87      | g.chr22:39895519insT                     | c.3006insT                 | -            | -                 | -                      | Frame shift indel |
| EP300       | B89-10   | g.chr22:39896446_39896457delGCCCAAGCGACT | c.2869_2880delGCCCAAGCGACT | -            | -                 | -                      | p.AQAT957_960del  |
| EP300       | B89-4    | g.chr22:39896421A>T                      | c.4352A>T                  | CAT=>CTT     | His=>Leu          | p.H1451L               | missense          |
| EP300       | B90      | g.chr22:39898557G>C                      | c.4561G>C                  | GAA=>CAA     | Glu=>Gln          | p.E1521Q               | missense          |
| EP300       | B96      | g.chr22:39843686_39843696delCTGGCAACTTA  | c.645_655delCTGGCAACTTA    | -            | -                 | -                      | Frame shift indel |
| ERBB3       | B110     | g.chr12:54775827G>C                      | c.2025G>C                  | AGG=>AGC     | Arg=>Ser          | p.R675S                | missense          |
| ERBB3       | B22      | g.chr12:54766608G>A                      | c.448G>A                   | GAG=>AAG     | Glu=>Lys          | p.E150K                | missense          |
| ERBB3       | B36      | g.chr12:54781711C>T                      | c.3634C>T                  | CCT=>TCT     | Pro=>Ser          | p.P1212S               | missense          |
| ERBB3       | B5       | g.chr12:54768804G>A                      | c.994G>A                   | GAG=>AAG     | Glu=>Lys          | p.E332K                | missense          |
| ERBB3       | B50      | g.chr12:54763898T>A                      | c.179T>A                   | ATG=>AAG     | Met=>Lys          | p.M60K                 | missense          |
| ERBB3       | B50      | g.chr12:54768165C>T                      | c.826C>T                   | CCC=>TCC     | Pro=>Ser          | p.P276S                | missense          |
| ERBB3       | B52      | g.chr12:54768804G>A                      | c.994G>A                   | GAG=>AAG     | Glu=>Lys          | p.E332K                | missense          |
| ERBB3       | B8       | g.chr12:54774492G>T                      | c.1744G>T                  | GGG=>TGG     | Gly=>Trp          | p.G582W                | missense          |
| ERBB3       | B9       | g.chr12:54765214C>T                      | c.403C>T                   | CGC=>TGC     | Arg=>Cys          | p.R135C                | missense          |
| ESPL1       | B104-0   | g.chr12:51966106G>C                      | c.3319G>C                  | GAG=>CAG     | Glu=>Gln          | p.E1107Q               | missense          |
| ESPL1       | B52      | g.chr12:51966032G>C                      | c.3245G>C                  | GGG=>GCG     | Gly=>Ala          | p.G1082A               | missense          |
| ESPL1       | B59      | g.chr12:51964158G>A                      | c.3127G>A                  | GAC=>AAC     | Asp=>Asn          | p.D1043N               | missense          |
| ESPL1       | B66      | g.chr12:51963435G>T                      | c.2923G>T                  | GAA=>TAA     | Glu=>Stop         | p.E975*                | nonsense          |
| ESPL1       | B8       | g.chr12:51949441C>G                      | c.448C>G                   | CTG=>GTG     | Leu=>Val          | p.L150V                | missense          |
| ESPL1       | B96      | g.chr12:51956839G>C                      | c.1869G>C                  | TGG=>TGC     | Trp=>Cys          | p.W623C                | missense          |
| FGFR3       | B103     | g.chr4:1773362C>T                        | c.742C>T                   | CGC=>TGC     | Arg=>Cys          | p.R248C                | missense          |
| FGFR3       | B104     | g.chr4:1775897A>G                        | c.1118A>G                  | TAT=>TGT     | Tyr=>Cys          | p.Y373C                | missense          |
| FGFR3       | B106     | g.chr4:1775887G>T                        | c.1108G>T                  | GGC=>TGC     | Gly=>Cys          | p.G370C                | missense          |
| FGFR3       | B110     | g.chr4:1773362C>T                        | c.742C>T                   | CGC=>TGC     | Arg=>Cys          | p.R248C                | missense          |
| FGFR3       | B114     | g.chr4:1775897A>G                        | c.1118A>G                  | TAT=>TGT     | Tyr=>Cys          | p.Y373C                | missense          |
| FGFR3       | B18      | g.chr4:1775897A>G                        | c.1118A>G                  | TAT=>TGT     | Tyr=>Cys          | p.Y373C                | missense          |
| FGFR3       | B56      | g.chr4:1773467C>T                        | c.847C>T                   | CCC=>TCC     | Pro=>Ser          | p.P283S                | missense          |
| FGFR3       | B89-4    | g.chr4:1775897A>G                        | c.1118A>G                  | TAT=>TGT     | Tyr=>Cys          | p.Y373C                | missense          |
| FGFR3       | B90      | g.chr4:1775897A>G                        | c.1118A>G                  | TAT=>TGT     | Tyr=>Cys          | p.Y373C                | missense          |
| FLNB        | B24      | g.chr3:58096914G>T                       | c.4840G>T                  | GCC=>TCC     | Ala=>Ser          | p.A1614S               | missense          |
| FLNB        | B37      | g.chr3:58070032C>G                       | c.2142C>G                  | ATC=>ATG     | Ile=>Met          | p.I714M                | missense          |
| FLNB        | B5       | g.chr3:58039558G>A                       | c.616G>A                   | GAT=>AAT     | Asp=>Asn          | p.D206N                | missense          |
| FRMPD1      | B80-8    | g.chr9:37734574C>G                       | c.2545C>G                  | CAG=>GAG     | Gln=>Glu          | p.Q849E                | missense          |
| GALM        | B5       | g.chr2:38746996A>T                       | c.189A>T                   | GAA=>GAT     | Glu=>Asp          | p.E63D                 | missense          |
| GALNT13     | B9       | g.chr2:154806836T>C                      | c.359T>C                   | GTC=>GCC     | Val=>Ala          | p.V120A                | missense          |



**Supplementary Table 5 continued. A list of all confirmed somatic mutations detected in the 97 TCCs.**

| Gene Symbol | Tumor ID | Nucleotide (genomic)# | Nucleotide (cDNA)\$ | Codon change | Amino acid change | Amino acid (protein) § | Mutation Type |
|-------------|----------|-----------------------|---------------------|--------------|-------------------|------------------------|---------------|
| GART        | B15      | g.chr21:33816453C>G   | c.1305G>C           | TTG=>TTC     | Leu=>Phe          | p.L435F                | missense      |
| GATC        | B15      | g.chr12:119379305G>A  | c.298G>A            | GCT=>ACT     | Ala=>Thr          | p.A100T                | missense      |
| GATC        | B15      | g.chr12:119379306C>T  | c.299C>T            | GCT=>GTT     | Ala=>Val          | p.A100V                | missense      |
| GCLM        | B8       | g.chr1:94127238C>A    | c.721G>T            | GAG=>TAG     | Glu=>Stop         | p.E241*                | nonsense      |
| GHRHR       | B9       | g.chr7:30982594C>G    | c.1000C>G           | CTG=>GTG     | Leu=>Val          | p.L334V                | missense      |
| GKN2        | B15      | g.chr2:69027849G>C    | c.249C>G            | ATC=>ATG     | Ile=>Met          | p.I83M                 | missense      |
| GLDC        | B10      | g.chr9:6592171G>C     | c.1093C>G           | CTT=>GTT     | Leu=>Val          | p.L365V                | missense      |
| GLRA3       | B15      | g.chr4:175801538C>G   | c.1324G>C           | GAG=>CAG     | Glu=>Gln          | p.E442Q                | missense      |
| GNA13       | B10      | g.chr17:60441372C>T   | c.599G>A            | AGA=>AAA     | Arg=>Lys          | p.R200K                | missense      |
| GON4L       | B5       | g.chr1:154052272G>A   | c.1109C>T           | TCA=>TTA     | Ser=>Leu          | p.S370L                | missense      |
| GPR158      | B71      | g.chr10:25927085G>A   | c.2524G>A           | GAG=>AAG     | Glu=>Lys          | p.E842K                | missense      |
| GPR182      | B10      | g.chr12:55675448T>C   | c.188T>C            | ATG=>ACG     | Met=>Thr          | p.M63T                 | missense      |
| GPR182      | B89-4    | g.chr12:55675511G>A   | c.251G>A            | CGG=>CAG     | Arg=>Gln          | p.R84Q                 | missense      |
| GRIA4       | B80      | g.chr11:105294798G>T  | c.1420G>T           | GCA=>TCA     | Ala=>Ser          | p.A474S                | missense      |
| GRIN2B      | B15      | g.chr12:13797804C>T   | c.724G>A            | GAA=>AAA     | Glu=>Lys          | p.E242K                | missense      |
| GRK4        | B10      | g.chr4:2993973C>T     | c.967C>T            | CGT=>TGT     | Arg=>Cys          | p.R323C                | missense      |
| GRM8        | B37      | g.chr7:125873466C>G   | c.2627G>C           | AGA=>ACA     | Arg=>Thr          | p.R876T                | missense      |
| GRM8        | B8       | g.chr7:126331895A>T   | c.806T>A            | CTG=>CAG     | Leu=>Gln          | p.L269Q                | missense      |
| GRXCR2      | B5       | g.chr5:145232654G>A   | c.71C>T             | TCC=>TTC     | Ser=>Phe          | p.S24F                 | missense      |
| GSG1        | B15      | g.chr12:13135015T>C   | c.14A>G             | GAG=>GGG     | Glu=>Gly          | p.E5G                  | missense      |
| GSR         | B8       | g.chr8:30673482G>C    | c.752C>G            | TCA=>TGA     | Ser=>Stop         | p.S251*                | nonsense      |
| HEXA        | B59      | g.chr15:70424856C>A   | c.1511G>T           | CGC=>CTC     | Arg=>Leu          | p.R504L                | missense      |
| HEXA        | B9       | g.chr15:70433127C>G   | c.418G>C            | GAG=>CAG     | Glu=>Gln          | p.E140Q                | missense      |
| HMCN1       | B104-0   | g.chr1:184239532G>C   | c.4408G>C           | GAC=>CAC     | Asp=>His          | p.D1470H               | missense      |
| HMCN1       | B111     | g.chr1:184198370G>T   | c.1926G>T           | AAG=>AAT     | Lys=>Asn          | p.K642N                | missense      |
| HMCN1       | B13      | g.chr1:184158191C>T   | c.958C>T            | CGA=>TGA     | Arg=>Stop         | p.R320*                | nonsense      |
| HMCN1       | B60      | g.chr1:184239532G>A   | c.4408G>A           | GAC=>AAC     | Asp=>Asn          | p.D1470N               | missense      |
| HMCN1       | B69      | g.chr1:184276882C>T   | c.6295C>T           | CGA=>TGA     | Arg=>Stop         | p.R2099*               | nonsense      |
| HMCN1       | B69      | g.chr1:184373396C>T   | c.13726C>T          | CGA=>TGA     | Arg=>Stop         | p.R4576*               | nonsense      |
| HMCN1       | B80      | g.chr1:184381266G>T   | c.14375G>T          | GGG=>GTG     | Gly=>Val          | p.G4792V               | missense      |
| HMCN1       | B86      | g.chr1:184237416C>A   | c.4268C>A           | CCA=>CAA     | Pro=>Gln          | p.P1423Q               | missense      |
| HMCN1       | B89-12   | g.chr1:184100291G>T   | c.406G>T            | GGT=>TGT     | Gly=>Cys          | p.G136C                | missense      |
| HMCN1       | B89-12   | g.chr1:184323322G>C   | c.9285G>C           | AAG=>AAC     | Lys=>Asn          | p.K3095N               | missense      |
| HOXB8       | B57      | g.chr17:44046699C>T   | c.367G>A            | GAG=>AAG     | Glu=>Lys          | p.E123K                | missense      |
| HRAS        | B105-0   | g.chr11:524286C>G     | c.37G>C             | GGT=>CGT     | Gly=>Arg          | p.G13R                 | missense      |
| HRAS        | B52      | g.chr11:523552C>G     | c.351G>C            | AAG=>AAC     | Lys=>Asn          | p.K117N                | missense      |
| HRAS        | B54      | g.chr11:524286C>G     | c.37G>C             | GGT=>CGT     | Gly=>Arg          | p.G13R                 | missense      |
| HRAS        | B62-0    | g.chr11:523874T>C     | c.182A>G            | CAG=>CGG     | Gln=>Arg          | p.Q61R                 | missense      |
| HRAS        | B70      | g.chr11:524286C>G     | c.37G>C             | GGT=>CGT     | Gly=>Arg          | p.G13R                 | missense      |
| HRAS        | B80-11   | g.chr11:523874T>C     | c.182A>G            | CAG=>CGG     | Gln=>Arg          | p.Q61R                 | missense      |
| HRAS        | B80-4    | g.chr11:523874T>C     | c.182A>G            | CAG=>CGG     | Gln=>Arg          | p.Q61R                 | missense      |
| HRAS        | B80-7    | g.chr11:523874T>C     | c.182A>G            | CAG=>CGG     | Gln=>Arg          | p.Q61R                 | missense      |
| HRAS        | B85-0    | g.chr11:523874T>C     | c.182A>G            | CAG=>CGG     | Gln=>Arg          | p.Q61R                 | missense      |
| HRAS        | B99      | g.chr11:524288C>T     | c.35G>A             | GGC=>GAC     | Gly=>Asp          | p.G12D                 | missense      |
| HSD17B6     | B5       | g.chr12:55464914C>T   | c.583C>T            | CAA=>TAA     | Gln=>Stop         | p.Q195*                | nonsense      |
| HSPA4L      | B74      | g.chr4:128945696T>C   | c.1004T>C           | ATT=>ACT     | Ile=>Thr          | p.I335T                | missense      |
| HSPG2       | B17      | g.chr1:22058700T>G    | c.5239A>C           | ACC=>CCC     | Thr=>Pro          | p.T1747P               | missense      |
| HSPG2       | B69      | g.chr1:22074773C>T    | c.3238G>A           | GCA=>ACA     | Ala=>Thr          | p.A1080T               | missense      |
| HSPG2       | B69      | g.chr1:22075397G>A    | c.2915C>T           | ACG=>ATG     | Thr=>Met          | p.T972M                | missense      |
| IFT57       | B10      | g.chr3:109364126C>G   | c.1178G>C           | AGA=>ACA     | Arg=>Thr          | p.R393T                | missense      |
| IL18RAP     | B15      | g.chr2:102406237C>A   | c.68C>A             | TCA=>TAA     | Ser=>Stop         | p.S23*                 | nonsense      |
| IL18RAP     | B98      | g.chr2:102430091C>T   | c.1202C>T           | ACG=>ATG     | Thr=>Met          | p.T401M                | missense      |
| INTU        | B96      | g.chr4:128854631G>A   | c.2650G>A           | GAA=>AAA     | Glu=>Lys          | p.E884K                | missense      |
| IQGAP1      | B5       | g.chr15:88797091G>A   | c.1243G>A           | GAA=>AAA     | Glu=>Lys          | p.E415K                | missense      |

**Supplementary Table 5 continued. A list of all confirmed somatic mutations detected in the 97 TCCs.**

| Gene Symbol | Tumor ID | Nucleotide (genomic)#             | Nucleotide (cDNA)\$ | Codon change | Amino acid change | Amino acid (protein) § | Mutation Type     |
|-------------|----------|-----------------------------------|---------------------|--------------|-------------------|------------------------|-------------------|
| IQSEC3      | B5       | g.chr12:117874G>A                 | c.175G>A            | GAG=>AAG     | Glu=>Lys          | p.E59K                 | missense          |
| IREB2       | B10      | g.chr15:76570091G>A               | c.2257G>A           | GAT=>AAT     | Asp=>Asn          | p.D753N                | missense          |
| IREB2       | B79      | g.chr15:76570097A>G               | c.2263A>G           | ATA=>GTA     | Ile=>Val          | p.I755V                | missense          |
| IRF1        | B13      | g.chr5:131848006G>A               | c.800C>T            | TCT=>TTT     | Ser=>Phe          | p.S267F                | missense          |
| IRF2        | B10      | g.chr4:185587176C>G               | c.37G>C             | GAG=>CAG     | Glu=>Gln          | p.E13Q                 | missense          |
| IRF2        | B69      | g.chr4:185576808G>A               | c.236C>T            | GCG=>GTG     | Ala=>Val          | p.A79V                 | missense          |
| KATNAL1     | B86      | g.chr13:29682508C>A               | c.1219G>T           | GAT=>TAT     | Asp=>Tyr          | p.D407Y                | missense          |
| KATNAL1     | B86      | g.chr13:29682523C>A               | c.1204G>T           | GAT=>TAT     | Asp=>Tyr          | p.D402Y                | missense          |
| KBTD4       | B10      | g.chr11:47556004C>A               | c.124G>T            | GAG=>TAG     | Glu=>Stop         | p.E42*                 | nonsense          |
| KBTD4       | B65      | g.chr11:47551211C>G               | c.1404G>C           | AAG=>AAC     | Lys=>Asn          | p.K468N                | missense          |
| KBTD4       | B74      | g.chr11:47551747C>T               | c.868G>A            | GTG=>ATG     | Val=>Met          | p.V290M                | missense          |
| KCTD7       | B15      | g.chr7:65741631G>C                | c.847G>C            | GAG=>CAG     | Glu=>Gln          | p.E283Q                | missense          |
| KIAA0141    | B104-0   | g.chr5:141294077C>T               | c.986C>T            | TCT=>TTT     | Ser=>Phe          | p.S329F                | missense          |
| KIAA0141    | B13      | g.chr5:141294310A>G               | c.1124A>G           | TAT=>TGT     | Tyr=>Cys          | p.Y375C                | missense          |
| KIAA0141    | B70      | g.chr5:141288021C>T               | c.386C>T            | TCA=>TTA     | Ser=>Leu          | p.S129L                | missense          |
| KIAA0556    | B9       | g.chr16:27668406_27668410delAAGAC | c.2235_2239delAAGAC | -            | -                 | -                      | Frame shift indel |
| KIAA1199    | B5       | g.chr15:79017240C>A               | c.3272C>A           | TCC=>TAC     | Ser=>Tyr          | p.S1091Y               | missense          |
| KIAA1199    | B5       | g.chr15:79017311C>T               | c.3343C>T           | CAG=>TAG     | Gln=>Stop         | p.Q1115*               | nonsense          |
| KIF15       | B23      | g.chr3:44816918A>T                | c.1207A>T           | AGC=>TGC     | Ser=>Cys          | p.S403C                | missense          |
| KIF15       | B5       | g.chr3:44810900A>G                | c.827A>G            | CAT=>CGT     | His=>Arg          | p.H276R                | missense          |
| KIF15       | B60      | g.chr3:44859672G>C                | c.3637G>C           | GAG=>CAG     | Glu=>Gln          | p.E1213Q               | missense          |
| KLC4        | B15      | g.chr6:43148598G>A                | c.1601G>A           | AGA=>AAA     | Arg=>Lys          | p.R534K                | missense          |
| KLC4        | B15      | g.chr6:43148639G>C                | c.1642G>C           | GAG=>CAG     | Glu=>Gln          | p.E548Q                | missense          |
| KLC4        | B15      | g.chr6:43148643G>A                | c.1646G>A           | GGA=>GAA     | Gly=>Glu          | p.G549E                | missense          |
| KLC4        | B89-5    | g.chr6:43142028G>A                | c.632G>A            | CGT=>CAT     | Arg=>His          | p.R211H                | missense          |
| KRAS        | B13      | g.chr12:25271544G>T               | c.181C>A            | CAA=>AAA     | Gln=>Lys          | p.Q61K                 | missense          |
| KRAS        | B25      | g.chr12:25289552C>A               | c.34G>T             | GGT=>TGT     | Gly=>Cys          | p.G12C                 | missense          |
| KRAS        | B35      | g.chr12:25289552C>A               | c.34G>T             | GGT=>TGT     | Gly=>Cys          | p.G12C                 | missense          |
| KRAS        | B45      | g.chr12:25289551C>A               | c.35G>T             | GGT=>GTT     | Gly=>Val          | p.G12V                 | missense          |
| KRAS        | B81-1    | g.chr12:25289551C>G               | c.35G>C             | GGT=>GCT     | Gly=>Ala          | p.G12A                 | missense          |
| KRAS        | B89-1    | g.chr12:25289552C>G               | c.34G>C             | GGT=>CGT     | Gly=>Arg          | p.G12R                 | missense          |
| KRT33A      | B5       | g.chr17:36759142G>A               | c.413C>T            | TCA=>TTA     | Ser=>Leu          | p.S138L                | missense          |
| KRT33A      | B69      | g.chr17:36756280C>T               | c.1043G>A           | CGG=>CAG     | Arg=>Gln          | p.R348Q                | missense          |
| LAMA4       | B36      | g.chr6:112537368C>G               | c.5416G>C           | GGC=>CGC     | Gly=>Arg          | p.G1806R               | missense          |
| LAMA4       | B36      | g.chr6:112572718T>C               | c.2443A>G           | ATT=>GTT     | Ile=>Val          | p.I815V                | missense          |
| LAMA4       | B63      | g.chr6:112564143A>T               | c.3268T>A           | TTT=>ATT     | Phe=>Ile          | p.F1090I               | missense          |
| LAMA4       | B66-0    | g.chr6:112600558C>T               | c.1478G>A           | AGG=>AAG     | Arg=>Lys          | p.R493K                | missense          |
| LAMA4       | B79      | g.chr6:112603267C>T               | c.1277G>A           | CGT=>CAT     | Arg=>His          | p.R426H                | missense          |
| LAMA4       | B8       | g.chr6:112619550C>A               | c.699G>T            | AGG=>AGT     | Arg=>Ser          | p.R233S                | missense          |
| LAMA4       | B83      | g.chr6:112681969G>A               | c.77C>T             | TCC=>TTC     | Ser=>Phe          | p.S26F                 | missense          |
| LAMA4       | B89-4    | g.chr6:112681967C>A               | c.79G>T             | GGG=>TGG     | Gly=>Trp          | p.G27W                 | missense          |
| LAMP2       | B8       | g.chrX:119466885G>A               | c.524C>T            | GCT=>GTT     | Ala=>Val          | p.A175V                | missense          |
| LARP5       | B10      | g.chr10:880956C>A                 | c.470G>T            | CGA=>CTA     | Arg=>Leu          | p.R157L                | missense          |
| LARP5       | B82      | g.chr10:920416G>A                 | c.112C>T            | CAG=>TAG     | Gln=>Stop         | p.Q38*                 | nonsense          |
| LEPRE1      | B36      | g.chr1:42985267G>A                | c.2318C>T           | ACT=>ATT     | Thr=>Ile          | p.T773I                | missense          |
| LGSN        | B10      | g.chr6:64053587G>T                | c.194C>A            | ACC=>AAC     | Thr=>Asn          | p.T65N                 | missense          |
| LNX1        | B10      | g.chr4:54037836A>G                | c.1445T>C           | TTG=>TCG     | Leu=>Ser          | p.L482S                | missense          |
| LNX1        | B15      | g.chr4:54039588C>T                | c.1276G>A           | GTC=>ATC     | Val=>Ile          | p.V426I                | missense          |
| LNX1        | B69      | g.chr4:54068391G>A                | c.337C>T            | CGG=>TGG     | Arg=>Trp          | p.R113W                | missense          |
| LNX1        | B88      | g.chr4:54057301G>C                | c.708C>G            | ATC=>ATG     | Ile=>Met          | p.I236M                | missense          |
| LOXL2       | B10      | g.chr8:23273640C>T                | c.439G>A            | GAC=>AAC     | Asp=>Asn          | p.D147N                | missense          |
| LRP2        | B10      | g.chr2:169842550C>T               | c.1723G>A           | GAC=>AAC     | Asp=>Asn          | p.D575N                | missense          |
| LRP2        | B35      | g.chr2:169781170C>T               | c.5665G>A           | GAC=>AAC     | Asp=>Asn          | p.D1889N               | missense          |
| LRP2        | B36      | g.chr2:169858960G>A               | c.596C>T            | GCT=>GTT     | Ala=>Val          | p.A199V                | missense          |

**Supplementary Table 5 continued. A list of all confirmed somatic mutations detected in the 97 TCCs.**

| Gene Symbol | Tumor ID | Nucleotide (genomic)#                              | Nucleotide (cDNA)\$                | Codon change | Amino acid change | Amino acid (protein) § | Mutation Type     |
|-------------|----------|----------------------------------------------------|------------------------------------|--------------|-------------------|------------------------|-------------------|
| LRP2        | B65      | g.chr2:169808183C>G                                | c.3526G>C                          | GAT=>CAT     | Asp=>His          | p.D1176H               | missense          |
| LRP2        | B66      | g.chr2:169710650C>G                                | c.12841G>C                         | GAA=>CAA     | Glu=>Gln          | p.E4281Q               | missense          |
| LRP2        | B68      | g.chr2:169770858T>C                                | c.7477A>G                          | ATG=>GTG     | Met=>Val          | p.M2493V               | missense          |
| LRP2        | B69      | g.chr2:169774310G>A                                | c.6368C>T                          | GCG=>GTG     | Ala=>Val          | p.A2123V               | missense          |
| LRP2        | B80      | g.chr2:169767606G>C                                | c.8115C>G                          | TTC=>TTG     | Phe=>Leu          | p.F2705L               | missense          |
| LRP2        | B84      | g.chr2:169721033C>A                                | c.12148G>T                         | GAG=>TAG     | Glu=>Stop         | p.E4050*               | nonsense          |
| MADD        | B69      | g.chr11:47257129A>T                                | c.1213A>T                          | ATT=>TTT     | Ile=>Phe          | p.I405F                | missense          |
| MAGEB18     | B80-0    | g.chrX:26067394C>T                                 | c.371C>T                           | ACG=>ATG     | Thr=>Met          | p.T124M                | missense          |
| MAP3K5      | B10      | g.chr6:137013859C>T                                | c.1744G>A                          | GAG=>AAG     | Glu=>Lys          | p.E582K                | missense          |
| MCM3        | B8       | g.chr6:52251543C>T                                 | c.835G>A                           | GAG=>AAG     | Glu=>Lys          | p.E279K                | missense          |
| MED1        | B9       | g.chr17:34819982G>A                                | c.2018C>T                          | TCC=>TTC     | Ser=>Phe          | p.S673F                | missense          |
| MERTK       | B10      | g.chr2:112482440C>G                                | c.1877C>G                          | TCT=>TGT     | Ser=>Cys          | p.S626C                | missense          |
| MERTK       | B37      | g.chr2:112477205C>T                                | c.1756C>T                          | CTT=>TTT     | Leu=>Phe          | p.L586F                | missense          |
| MERTK       | B89-16   | g.chr2:112421468G>A                                | c.610G>A                           | GAG=>AAG     | Glu=>Lys          | p.E204K                | missense          |
| METTL10     | B10      | g.chr10:126467636A>G                               | c.257T>C                           | ATT=>ACT     | Ile=>Thr          | p.I86T                 | missense          |
| MITF        | B52      | g.chr3:70096892G>A                                 | c.1063G>A                          | GGA=>AGA     | Gly=>Arg          | p.G355R                | missense          |
| MITF        | B9       | g.chr3:70071016T>A                                 | c.339T>A                           | TGT=>TGA     | Cys=>Stop         | p.C113*                | nonsense          |
| MLH1        | B15      | g.chr3:37042462G>C                                 | c.1369G>C                          | GAA=>CAA     | Glu=>Gln          | p.E457Q                | missense          |
| MLL         | B103     | g.chr11:117864574C>A                               | c.4368C>A                          | CAC=>CAA     | His=>Gln          | p.H1456Q               | missense          |
| MLL         | B112     | g.chr11:117864643C>G                               | c.4437C>G                          | TGC=>TGG     | Cys=>Trp          | p.C1479W               | missense          |
| MLL         | B35      | g.chr11:117895917C>G                               | c.11348C>G                         | TCT=>TGT     | Ser=>Cys          | p.S3783C               | missense          |
| MLL         | B66      | g.chr11:117875247_117875266delTTGAAGTTTTCAGAAGAGTG | c.5939_5958delTTGAAGTTTTCAGAAGAGTG | -            | -                 | -                      | Frame shift indel |
| MLL         | B69      | g.chr11:117852746C>G                               | c.3173C>G                          | TCA=>TGA     | Ser=>Stop         | p.S1058*               | nonsense          |
| MLL         | B69      | g.chr11:117864633_117864635delGTC                  | c.4428_4430delGTC                  | -            | -                 | -                      | indel             |
| MLL         | B71      | g.chr11:117880473C>G                               | c.8647C>G                          | CTT=>GTT     | Leu=>Val          | p.L2883V               | missense          |
| MLL         | B73      | g.chr11:117879382C>T                               | c.7556C>T                          | ACA=>ATA     | Thr=>Ile          | p.T2519I               | missense          |
| MLL3        | B5       | g.chr7:151510591G>A                                | c.5287C>T                          | CAG=>TAG     | Gln=>Stop         | p.Q1763*               | nonsense          |
| MLL3        | B5       | g.chr7:151531025_151531025delC                     | c.4020_4020delC                    | -            | -                 | -                      | Frame shift indel |
| MLL3        | B60      | g.chr7:151639897G>A                                | c.658C>T                           | CAA=>TAA     | Gln=>Stop         | p.Q220*                | nonsense          |
| MLL3        | B70      | g.chr7:151504437G>A                                | c.9034C>T                          | CAA=>TAA     | Gln=>Stop         | p.Q3012*               | nonsense          |
| MLL3        | B89-12   | g.chr7:151476545T>A                                | c.13400A>T                         | AAG=>ATG     | Lys=>Met          | p.K4467M               | missense          |
| MLL3        | B89-4    | g.chr7:151482083C>A                                | c.12221G>T                         | GGT=>GTT     | Gly=>Val          | p.G4074V               | missense          |
| MMAB        | B10      | g.chr12:108491010C>T                               | c.238G>A                           | GAC=>AAC     | Asp=>Asn          | p.D80N                 | missense          |
| MPO         | B5       | g.chr17:53713001G>C                                | c.118C>G                           | CTG=>GTG     | Leu=>Val          | p.L40V                 | missense          |
| MPO         | B86      | g.chr17:53710482G>C                                | c.909C>G                           | ATC=>ATG     | Ile=>Met          | p.I303M                | missense          |
| MS4A14      | B5       | g.chr11:59939537C>A                                | c.520C>A                           | CCA=>ACA     | Pro=>Thr          | p.P174T                | missense          |
| MTBP        | B10      | g.chr8:121599376C>T                                | c.2351C>T                          | TCC=>TTC     | Ser=>Phe          | p.S784F                | missense          |
| MTBP        | B86      | g.chr8:121532430C>T                                | c.206C>T                           | TCA=>TTA     | Ser=>Leu          | p.S69L                 | missense          |
| MYH6        | B69      | g.chr14:22939832C>T                                | c.1336G>A                          | GCC=>ACC     | Ala=>Thr          | p.A446T                | missense          |
| MYST1       | B15      | g.chr16:31039293G>A                                | c.419G>A                           | CGC=>CAC     | Arg=>His          | p.R140H                | missense          |
| NCOA7       | B66      | g.chr6:126252215C>G                                | c.1322C>G                          | TCT=>TGT     | Ser=>Cys          | p.S441C                | missense          |
| NCOR1       | B107     | g.chr17:15914252G>C                                | c.4465C>G                          | CAA=>GAA     | Gln=>Glu          | p.Q1489E               | missense          |
| NCOR1       | B45      | g.chr17:15935901C>A                                | -                                  | -            | -                 | -                      | spliceSite        |
| NCOR1       | B66      | g.chr17:15981413C>G                                | c.1446G>C                          | AAG=>AAC     | Lys=>Asn          | p.K482N                | missense          |
| NCOR1       | B69      | g.chr17:15924760G>A                                | c.3184C>T                          | CCA=>TCA     | Pro=>Ser          | p.P1062S               | missense          |
| NCOR1       | B69      | g.chr17:15997435C>G                                | -                                  | -            | -                 | -                      | spliceSite        |
| NCOR1       | B74      | g.chr17:16030638C>T                                | c.197G>A                           | CGA=>CAA     | Arg=>Gln          | p.R66Q                 | missense          |
| NCOR1       | B96      | g.chr17:15914368G>A                                | c.4349C>T                          | TCA=>TTA     | Ser=>Leu          | p.S1450L               | missense          |
| NF1         | B101     | g.chr17:26689262G>C                                | c.6798G>C                          | CAG=>CAC     | Gln=>His          | p.Q2266H               | missense          |
| NF1         | B104-0   | g.chr17:26584256G>C                                | c.3607G>C                          | GAT=>CAT     | Asp=>His          | p.D1203H               | missense          |
| NF1         | B36      | g.chr17:26578434A>C                                | c.2324A>C                          | GAG=>GCG     | Glu=>Ala          | p.E775A                | missense          |
| NF1         | B5       | g.chr17:26711630G>T                                | -                                  | -            | -                 | -                      | spliceSite        |

**Supplementary Table 5 continued. A list of all confirmed somatic mutations detected in the 97 TCCs.**

| Gene Symbol | Tumor ID | Nucleotide (genomic)# | Nucleotide (cDNA)\$ | Codon change | Amino acid change | Amino acid (protein) § | Mutation Type |
|-------------|----------|-----------------------|---------------------|--------------|-------------------|------------------------|---------------|
| NF1         | B59      | g.chr17:26686074C>T   | c.5905C>T           | CAA=>TAA     | Gln=>Stop         | p.Q1969*               | nonsense      |
| NF1         | B60      | g.chr17:26533672G>C   | c.751G>C            | GAC=>CAC     | Asp=>His          | p.D251H                | missense      |
| NF1         | B78      | g.chr17:26600183G>A   | c.4030G>A           | GAA=>AAA     | Glu=>Lys          | p.E1344K               | missense      |
| NFE2L3      | B103     | g.chr7:26191453G>A    | c.1610G>A           | CGT=>CAT     | Arg=>His          | p.R537H                | missense      |
| NFE2L3      | B111     | g.chr7:26190712G>C    | c.869G>C            | AGT=>ACT     | Ser=>Thr          | p.S290T                | missense      |
| NFE2L3      | B13      | g.chr7:26190733C>G    | c.890C>G            | TCT=>TGT     | Ser=>Cys          | p.S297C                | missense      |
| NFE2L3      | B13      | g.chr7:26190885C>G    | c.1042C>G           | CAT=>GAT     | His=>Asp          | p.H348D                | missense      |
| NFE2L3      | B13      | g.chr7:26191117C>G    | c.1274C>G           | TCA=>TGA     | Ser=>Stop         | p.S425*                | nonsense      |
| NFE2L3      | B83      | g.chr7:26191329C>T    | c.1486C>T           | CAT=>TAT     | His=>Tyr          | p.H496Y                | missense      |
| NKD1        | B15      | g.chr16:49224615G>A   | c.835G>A            | GTG=>ATG     | Val=>Met          | p.V279M                | missense      |
| NKD1        | B69      | g.chr16:49224717G>A   | c.937G>A            | GTG=>ATG     | Val=>Met          | p.V313M                | missense      |
| NLRP14      | B10      | g.chr11:7020837G>A    | c.1004G>A           | AGA=>AAA     | Arg=>Lys          | p.R335K                | missense      |
| NLRP14      | B69      | g.chr11:7016568G>A    | c.175G>A            | GCC=>ACC     | Ala=>Thr          | p.A59T                 | missense      |
| NLRP14      | B98      | g.chr11:7020534C>G    | c.701C>G            | TCA=>TGA     | Ser=>Stop         | p.S234*                | nonsense      |
| NPR2        | B105-0   | g.chr9:35792269G>A    | c.1699G>A           | GAA=>AAA     | Glu=>Lys          | p.E567K                | missense      |
| NPR2        | B15      | g.chr9:35799413G>C    | c.3115G>C           | GAG=>CAG     | Glu=>Gln          | p.E1039Q               | missense      |
| NPR2        | B69      | g.chr9:35792578G>A    | c.1789G>A           | GAA=>AAA     | Glu=>Lys          | p.E597K                | missense      |
| NR1D2       | B5       | g.chr3:23976187C>T    | c.394C>T            | CAA=>TAA     | Gln=>Stop         | p.Q132*                | nonsense      |
| NUP62       | B10      | g.chr19:55103337C>T   | c.1540G>A           | GAG=>AAG     | Glu=>Lys          | p.E514K                | missense      |
| NUP62       | B45      | g.chr19:55103321A>T   | c.1556T>A           | ATC=>AAC     | Ile=>Asn          | p.I519N                | missense      |
| OGDH        | B15      | g.chr7:44630570C>A    | c.103C>A            | CAA=>AAA     | Gln=>Lys          | p.Q35K                 | missense      |
| OPCML       | B10      | g.chr11:132032309G>A  | c.283C>T            | CCA=>TCA     | Pro=>Ser          | p.P95S                 | missense      |
| OPCML       | B89-4    | g.chr11:132032242A>G  | c.350T>C            | GTG=>GCG     | Val=>Ala          | p.V117A                | missense      |
| OPCML       | B96      | g.chr11:132032228G>A  | c.364C>T            | CAT=>TAT     | His=>Tyr          | p.H122Y                | missense      |
| OR10A4      | B10      | g.chr11:6854722G>A    | c.268G>A            | GAC=>AAC     | Asp=>Asn          | p.D90N                 | missense      |
| OR2B2       | B5       | g.chr6:27987022G>C    | c.1055C>G           | CCT=>CGT     | Pro=>Arg          | p.P352R                | missense      |
| OR4F6       | B36      | g.chr15:100163866T>G  | c.421T>G            | TGC=>GGC     | Cys=>Gly          | p.C141G                | missense      |
| OR5M9       | B10      | g.chr11:55987241G>C   | c.213C>G            | TTC=>TTG     | Phe=>Leu          | p.F71L                 | missense      |
| OR9Q1       | B5       | g.chr11:57704009G>C   | c.517G>C            | GAG=>CAG     | Glu=>Gln          | p.E173Q                | missense      |
| OSGIN2      | B8       | g.chr8:91006157C>T    | c.740C>T            | TCT=>TTT     | Ser=>Phe          | p.S247F                | missense      |
| PADI4       | B13      | g.chr1:17562797G>C    | c.1952G>C           | AGA=>ACA     | Arg=>Thr          | p.R651T                | missense      |
| PADI4       | B23      | g.chr1:17547097A>T    | c.1122A>T           | AGA=>AGT     | Arg=>Ser          | p.R374S                | missense      |
| PAK3        | B9       | g.chrX:110326372C>T   | c.1255C>T           | CGA=>TGA     | Arg=>Stop         | p.R419*                | nonsense      |
| PARD6B      | B8       | g.chr20:48799813A>T   | c.500A>T            | AAA=>ATA     | Lys=>Ile          | p.K167I                | missense      |
| PCIF1       | B13      | g.chr20:44007787G>A   | c.1199G>A           | CGC=>CAC     | Arg=>His          | p.R400H                | missense      |
| PCK1        | B23      | g.chr20:55573934C>T   | c.1537C>T           | CAT=>TAT     | His=>Tyr          | p.H513Y                | missense      |
| PFKL        | B10      | g.chr21:44556440C>T   | c.403C>T            | CGC=>TGC     | Arg=>Cys          | p.R135C                | missense      |
| PFKL        | B96      | g.chr21:44550152C>A   | c.132C>A            | TTC=>TTA     | Phe=>Leu          | p.F44L                 | missense      |
| PIPOX       | B5       | g.chr17:24396034A>T   | c.146A>T            | CAT=>CTT     | His=>Leu          | p.H49L                 | missense      |
| PLCB1       | B10      | g.chr20:8669032C>G    | c.2350C>G           | CTG=>GTG     | Leu=>Val          | p.L784V                | missense      |
| PLCB1       | B106     | g.chr20:8657699A>C    | c.1766A>C           | TAT=>TCT     | Tyr=>Ser          | p.Y589S                | missense      |
| PLCB1       | B37      | g.chr20:8657750C>A    | c.1817C>A           | TCA=>TAA     | Ser=>Stop         | p.S606*                | nonsense      |
| PLXNB1      | B15      | g.chr3:48423472G>A    | c.6118C>T           | CGG=>TGG     | Arg=>Trp          | p.R2040W               | missense      |
| PLXNB1      | B69      | g.chr3:48429574C>T    | c.4544G>A           | AGC=>AAC     | Ser=>Asn          | p.S1515N               | missense      |
| POLD1       | B5       | g.chr19:55601316C>G   | c.1308C>G           | TTC=>TTG     | Phe=>Leu          | p.F436L                | missense      |
| POLD1       | B69      | g.chr19:55601302C>T   | c.1294C>T           | CGG=>TGG     | Arg=>Trp          | p.R432W                | missense      |
| PORCN       | B8       | g.chrX:48254673C>G    | c.183C>G            | TTC=>TTG     | Phe=>Leu          | p.F61L                 | missense      |
| PPM1G       | B10      | g.chr2:27460445C>T    | c.844G>A            | GAT=>AAT     | Asp=>Asn          | p.D282N                | missense      |
| PPP1R9A     | B5       | g.chr7:94378002C>T    | c.641C>T            | TCT=>TTT     | Ser=>Phe          | p.S214F                | missense      |
| PPP1R9A     | B63      | g.chr7:94378011C>T    | c.650C>T            | GCC=>GTC     | Ala=>Val          | p.A217V                | missense      |
| PRDM10      | B5       | g.chr11:129333003G>C  | c.82C>G             | CCG=>GCG     | Pro=>Ala          | p.P28A                 | missense      |
| PRDM10      | B64      | g.chr11:129322343C>T  | c.169G>A            | GAC=>AAC     | Asp=>Asn          | p.D57N                 | missense      |
| PRMT5       | B9       | g.chr14:22463743G>C   | c.955C>G            | CTG=>GTG     | Leu=>Val          | p.L319V                | missense      |
| PWP2        | B13      | g.chr21:44358157G>A   | -                   | -            | -                 | -                      | spliceSite    |

**Supplementary Table 5 continued. A list of all confirmed somatic mutations detected in the 97 TCCs.**

| Gene Symbol | Tumor ID | Nucleotide (genomic)#        | Nucleotide (cDNA)\$ | Codon change | Amino acid change | Amino acid (protein) § | Mutation Type     |
|-------------|----------|------------------------------|---------------------|--------------|-------------------|------------------------|-------------------|
| RB1         | B105-1   | g.chr13:47832153G>A          | -                   | -            | -                 | -                      | spliceSite        |
| RB1         | B109     | g.chr13:47832195C>T          | c.649C>T            | CAG=>TAG     | Gln=>Stop         | p.Q217*                | nonsense          |
| RB1         | B23      | g.chr13:47937216A>T          | c.2293A>T           | AAA=>TAA     | Lys=>Stop         | p.K765*                | nonsense          |
| RB1         | B34      | g.chr13:47937506G>C          | -                   | -            | -                 | -                      | spliceSite        |
| RB1         | B37      | g.chr13:47839721C>T          | c.1030C>T           | CAG=>TAG     | Gln=>Stop         | p.Q344*                | nonsense          |
| RB1         | B47      | g.chr13:47935932T>A          | c.2171T>A           | ATT=>AAT     | Ile=>Asn          | p.I724N                | missense          |
| RB1         | B74      | g.chr13:47845630G>A          | -                   | -            | -                 | -                      | spliceSite        |
| RB1         | B80-0    | g.chr13:47849157G>A          | c.1318G>A           | GAA=>AAA     | Glu=>Lys          | p.E440K                | missense          |
| RB1         | B83      | g.chr13:47928427C>G          | c.1901C>G           | TCA=>TGA     | Ser=>Stop         | p.S634*                | nonsense          |
| RB1         | B85-0    | g.chr13:47852343C>T          | c.1463C>T           | GCG=>GTG     | Ala=>Val          | p.A488V                | missense          |
| RB1         | B86      | g.chr13:47853581G>T          | -                   | -            | -                 | -                      | spliceSite        |
| RFC1        | B36      | g.chr4:39029412T>A           | c.83A>T             | AAG=>ATG     | Lys=>Met          | p.K28M                 | missense          |
| RFC1        | B5       | g.chr4:38968006G>C           | c.3217C>G           | CCA=>GCA     | Pro=>Ala          | p.P1073A               | missense          |
| RPS11       | B5       | g.chr19:54692595G>C          | c.154G>C            | GAG=>CAG     | Glu=>Gln          | p.E52Q                 | missense          |
| SACS        | B77      | g.chr13:22808100T>A          | c.7474A>T           | ATT=>TTT     | Ile=>Phe          | p.I2492F               | missense          |
| SACS        | B90      | g.chr13:22809606G>C          | c.5968C>G           | CAG=>GAG     | Gln=>Glu          | p.Q1990E               | missense          |
| SAMD9L      | B105-1   | g.chr7:92601129A>G           | c.2092T>C           | TTC=>CTC     | Phe=>Leu          | p.F698L                | missense          |
| SAMD9L      | B5       | g.chr7:92601459G>A           | c.1762C>T           | CAA=>TAA     | Gln=>Stop         | p.Q588*                | nonsense          |
| SAMD9L      | B83      | g.chr7:92599488C>T           | c.3733G>A           | GAA=>AAA     | Glu=>Lys          | p.E1245K               | missense          |
| SASH1       | B10      | g.chr6:148803043C>T          | c.316C>T            | CAG=>TAG     | Gln=>Stop         | p.Q106*                | nonsense          |
| SCRN3       | B86      | g.chr2:174995966C>T          | c.862C>T            | CAA=>TAA     | Gln=>Stop         | p.Q288*                | nonsense          |
| SCRN3       | B89-12   | g.chr2:174997470A>G          | c.939A>G            | ATA=>ATG     | Ile=>Met          | p.I313M                | missense          |
| SDK1        | B5       | g.chr7:4180413C>T            | c.295C>T            | CAG=>TAG     | Gln=>Stop         | p.Q99*                 | nonsense          |
| SDK1        | B86      | g.chr7:4085723G>A            | c.3305G>A           | AGG=>AAG     | Arg=>Lys          | p.R1102K               | missense          |
| SEMA4F      | B9       | g.chr2:74755209C>G           | c.899C>G            | CCT=>CGT     | Pro=>Arg          | p.P300R                | missense          |
| SEMA4F      | B9       | g.chr2:74755302C>T           | c.992C>T            | TCT=>TTT     | Ser=>Phe          | p.S331F                | missense          |
| SEMA6D      | B105-1   | g.chr15:45841199G>A          | c.497G>A            | TGC=>TAC     | Cys=>Tyr          | p.C166Y                | missense          |
| SEMA6D      | B110     | g.chr15:45840888A>G          | c.415A>G            | AAT=>GAT     | Asn=>Asp          | p.N139D                | missense          |
| SEMA6D      | B13      | g.chr15:45843717C>G          | c.1020C>G           | TTC=>TTG     | Phe=>Leu          | p.F340L                | missense          |
| SEMA6D      | B71      | g.chr15:45844508G>A          | c.1390G>A           | GTA=>ATA     | Val=>Ile          | p.V464I                | missense          |
| SESN2       | B13      | g.chr1:28458962_28458962delC | c.18_18delC         | -            | -                 | -                      | Frame shift indel |
| SESN2       | B36      | g.chr1:28470874C>T           | c.259C>T            | CCT=>TCT     | Pro=>Ser          | p.P87S                 | missense          |
| SH3RF1      | B34      | g.chr4:170254280C>A          | c.2632G>T           | GGC=>TGC     | Gly=>Cys          | p.G878C                | missense          |
| SH3RF1      | B69      | g.chr4:170254295G>A          | c.2617C>T           | CGT=>TGT     | Arg=>Cys          | p.R873C                | missense          |
| SH3RF1      | B89-4    | g.chr4:170426861C>G          | c.78G>C             | TTG=>TTC     | Leu=>Phe          | p.L26F                 | missense          |
| SLC26A4     | B9       | g.chr7:107140268G>C          | c.2284G>C           | GAG=>CAG     | Glu=>Gln          | p.E762Q                | missense          |
| SLCO4C1     | B69      | g.chr5:101634275C>T          | c.754G>A            | GCC=>ACC     | Ala=>Thr          | p.A252T                | missense          |
| SMPD4       | B89-12   | g.chr2:130627432C>T          | c.2072G>A           | GGA=>GAA     | Gly=>Glu          | p.G691E                | missense          |
| SP110       | B5       | g.chr2:230782913G>C          | c.806C>G            | TCC=>TGC     | Ser=>Cys          | p.S269C                | missense          |
| SPAG1       | B23      | g.chr8:101259313C>G          | c.394C>G            | CGT=>GGT     | Arg=>Gly          | p.R132G                | missense          |
| SPAG1       | B5       | g.chr8:101306582C>G          | c.1694C>G           | TCA=>TGA     | Ser=>Stop         | p.S565*                | nonsense          |
| SPAG1       | B5       | g.chr8:101306654C>T          | c.1766C>T           | TCT=>TTT     | Ser=>Phe          | p.S589F                | missense          |
| SRRM2       | B22      | g.chr16:2753220C>T           | c.2690C>T           | CCT=>CTT     | Pro=>Leu          | p.P897L                | missense          |
| SRRM2       | B5       | g.chr16:2756097C>T           | c.5567C>T           | ACA=>ATA     | Thr=>Ile          | p.T1856I               | missense          |
| SRRM2       | B80      | g.chr16:2754950T>G           | c.4420T>G           | TCT=>GCT     | Ser=>Ala          | p.S1474A               | missense          |
| SRRM2       | B80      | g.chr16:2756589C>T           | c.6059C>T           | TCC=>TTC     | Ser=>Phe          | p.S2020F               | missense          |
| STAG2       | B10      | g.chrX:123048197C>A          | c.3173C>A           | TCA=>TAA     | Ser=>Stop         | p.S1058*               | nonsense          |
| STAG2       | B109     | g.chrX:123037893T>C          | c.2564T>C           | ATT=>ACT     | Ile=>Thr          | p.I855T                | missense          |
| STAG2       | B89-4    | g.chrX:123011737G>T          | c.914G>T            | CGA=>CTA     | Arg=>Leu          | p.R305L                | missense          |
| SUPT16H     | B10      | g.chr14:20895268T>A          | c.2588A>T           | GAC=>GTC     | Asp=>Val          | p.D863V                | missense          |
| SUPT16H     | B10      | g.chr14:20895269C>G          | c.2587G>C           | GAC=>CAC     | Asp=>His          | p.D863H                | missense          |
| SYNE1       | B10      | g.chr6:152587376G>T          | c.21255C>A          | TTC=>TTA     | Phe=>Leu          | p.F7085L               | missense          |
| SYNE1       | B104     | g.chr6:152788249C>T          | c.5248G>A           | GAT=>AAT     | Asp=>Asn          | p.D1750N               | missense          |
| SYNE1       | B21      | g.chr6:152681023G>C          | c.16245C>G          | TTC=>TTG     | Phe=>Leu          | p.F5415L               | missense          |

**Supplementary Table 5 continued. A list of all confirmed somatic mutations detected in the 97 TCCs.**

| Gene Symbol | Tumor ID | Nucleotide (genomic)#                    | Nucleotide (cDNA)\$        | Codon change | Amino acid change | Amino acid (protein) § | Mutation Type     |
|-------------|----------|------------------------------------------|----------------------------|--------------|-------------------|------------------------|-------------------|
| SYNE1       | B80-3    | g.chr6:152779553C>G                      | c.5733G>C                  | TTG=>TTC     | Leu=>Phe          | p.L1911F               | missense          |
| SYNE1       | B83      | g.chr6:152776237C>T                      | c.6194G>A                  | AGG=>AAG     | Arg=>Lys          | p.R2065K               | missense          |
| SYNE1       | B86      | g.chr6:152804947C>T                      | c.3985G>A                  | GAT=>AAT     | Asp=>Asn          | p.D1329N               | missense          |
| SYNE1       | B96      | g.chr6:152499480C>T                      | c.2180G>A                  | CGG=>CAG     | Arg=>Gln          | p.R727Q                | missense          |
| TAOK3       | B47      | g.chr12:117123638C>T                     | c.833G>A                   | CGA=>CAA     | Arg=>Gln          | p.R278Q                | missense          |
| TAOK3       | B5       | g.chr12:117094743G>A                     | c.1801C>T                  | CTC=>TTC     | Leu=>Phe          | p.L601F                | missense          |
| TAOK3       | B8       | g.chr12:117084201C>G                     | c.1914G>C                  | AAG=>AAC     | Lys=>Asn          | p.K638N                | missense          |
| TDRD1       | B15      | g.chr10:115963268G>C                     | c.2005G>C                  | GAT=>CAT     | Asp=>His          | p.D669H                | missense          |
| TDRD1       | B45      | g.chr10:115971127G>A                     | c.2792G>A                  | TGG=>TAG     | Trp=>Stop         | p.W931*                | nonsense          |
| TDRD1       | B89-4    | g.chr10:115971201T>C                     | c.2866T>C                  | TAT=>CAT     | Tyr=>His          | p.Y956H                | missense          |
| TEX14       | B114     | g.chr17:54034912T>G                      | c.1375A>C                  | AAA=>CAA     | Lys=>Gln          | p.K459Q                | missense          |
| TEX14       | B13      | g.chr17:54031771G>T                      | c.1934C>A                  | TCT=>TAT     | Ser=>Tyr          | p.S645Y                | missense          |
| TG          | B101     | g.chr8:133963297G>A                      | c.646G>A                   | GAT=>AAT     | Asp=>Asn          | p.D216N                | missense          |
| TG          | B15      | g.chr8:134053254C>A                      | c.6009C>A                  | GAC=>GAA     | Asp=>Glu          | p.D2003E               | missense          |
| TG          | B60      | g.chr8:134099264C>T                      | c.6622C>T                  | CGG=>TGG     | Arg=>Trp          | p.R2208W               | missense          |
| TG          | B77      | g.chr8:133994551G>A                      | c.4237G>A                  | GAC=>AAC     | Asp=>Asn          | p.D1413N               | missense          |
| TG          | B78      | g.chr8:133968926G>C                      | c.2127G>C                  | GAG=>GAC     | Glu=>Asp          | p.E709D                | missense          |
| TG          | B80-0    | g.chr8:133988174G>C                      | c.3694G>C                  | GAG=>CAG     | Glu=>Gln          | p.E1232Q               | missense          |
| TMPRSS2     | B9       | g.chr21:41761628insCT                    | c.109insCT                 | -            | -                 | -                      | Frame shift indel |
| TNFAIP8L3   | B15      | g.chr15:49137513G>T                      | c.736C>A                   | CAC=>AAC     | His=>Asn          | p.H246N                | missense          |
| TP53        | B101     | g.chr17:7517824C>G                       | c.839G>C                   | AGA=>ACA     | Arg=>Thr          | p.R280T                | missense          |
| TP53        | B104-0   | g.chr17:7517852C>T                       | c.811G>A                   | GAG=>AAG     | Glu=>Lys          | p.E271K                | missense          |
| TP53        | B14      | g.chr17:7517824C>T                       | c.839G>A                   | AGA=>AAA     | Arg=>Lys          | p.R280K                | missense          |
| TP53        | B16      | g.chr17:7517881C>T                       | -                          | -            | -                 | -                      | spliceSite        |
| TP53        | B23      | g.chr17:7517653T>A                       | -                          | -            | -                 | -                      | spliceSite        |
| TP53        | B36      | g.chr17:7517824C>G                       | c.839G>C                   | AGA=>ACA     | Arg=>Thr          | p.R280T                | missense          |
| TP53        | B37      | g.chr17:7518305T>C                       | c.701A>G                   | TAC=>TGC     | Tyr=>Cys          | p.Y234C                | missense          |
| TP53        | B59-3    | g.chr17:7520258G>A                       | c.154C>T                   | CAA=>TAA     | Gln=>Stop         | p.Q52*                 | nonsense          |
| TP53        | B60      | g.chr17:7517810C>A                       | c.853G>T                   | GAG=>TAG     | Glu=>Stop         | p.E285*                | nonsense          |
| TP53        | B61      | g.chr17:7517810C>A                       | c.853G>T                   | GAG=>TAG     | Glu=>Stop         | p.E285*                | nonsense          |
| TP53        | B63      | g.chr17:7518936C>A                       | c.638G>T                   | CGA=>CTA     | Arg=>Leu          | p.R213L                | missense          |
| TP53        | B66      | g.chr17:7520038G>A                       | c.374C>T                   | ACG=>ATG     | Thr=>Met          | p.T125M                | missense          |
| TP53        | B71      | g.chr17:7519095C>G                       | -                          | -            | -                 | -                      | spliceSite        |
| TP53        | B74      | g.chr17:7517822C>T                       | c.841G>A                   | GAC=>AAC     | Asp=>Asn          | p.D281N                | missense          |
| TP53        | B74      | g.chr17:7517824C>T                       | c.839G>A                   | AGA=>AAA     | Arg=>Lys          | p.R280K                | missense          |
| TP53        | B77      | g.chr17:7517810C>T                       | c.853G>A                   | GAG=>AAG     | Glu=>Lys          | p.E285K                | missense          |
| TP53        | B8       | g.chr17:7519167T>C                       | c.488A>G                   | TAC=>TGC     | Tyr=>Cys          | p.Y163C                | missense          |
| TP53        | B81      | g.chr17:7518993A>C                       | c.581T>G                   | CTT=>CGT     | Leu=>Arg          | p.L194R                | missense          |
| TP53        | B84      | g.chr17:7517866C>T                       | c.797G>A                   | GGA=>GAA     | Gly=>Glu          | p.G266E                | missense          |
| TP53        | B89-12   | g.chr17:7518982C>A                       | c.592G>T                   | GAA=>TAA     | Glu=>Stop         | p.E198*                | nonsense          |
| TP53        | B9       | g.chr17:7519238_7519251delCTTGGCCAGTTGGC | c.418_431delCTTGGCCAGTTGGC | -            | -                 | -                      | Frame shift indel |
| TRIM23      | B101     | g.chr5:64943386C>T                       | c.445G>A                   | GAG=>AAG     | Glu=>Lys          | p.E149K                | missense          |
| TRIM23      | B15      | g.chr5:64942586G>A                       | c.686C>T                   | TCA=>TTA     | Ser=>Leu          | p.S229L                | missense          |
| TRPV5       | B15      | g.chr7:142315962G>T                      | c.2030C>A                  | GCC=>GAC     | Ala=>Asp          | p.A677D                | missense          |
| UBC         | B8       | g.chr12:123964210C>T                     | c.61G>A                    | GAC=>AAC     | Asp=>Asn          | p.D21N                 | missense          |
| USP26       | B17      | g.chrX:131988074_131988084delTGGCCTTTTT  | c.902_912delTGGCCTTTTT     | -            | -                 | -                      | Frame shift indel |
| USP26       | B82      | g.chrX:131987256C>T                      | c.2659G>A                  | GAG=>AAG     | Glu=>Lys          | p.E887K                | missense          |
| USP48       | B10      | g.chr1:21928841T>C                       | c.1243A>G                  | ATG=>GTG     | Met=>Val          | p.M415V                | missense          |
| UTX         | B101     | g.chrX:44807883_44807892delAAGTGGAAAGT   | c.1801_1810delAAGTGGAAAGT  | -            | -                 | -                      | Frame shift indel |
| UTX         | B101     | g.chrX:44813956_44813965delTACCTCAGGT    | c.2095_2104delTACCTCAGGT   | -            | -                 | -                      | Frame shift indel |
| UTX         | B104-0   | g.chrX:44764915T>G                       | c.560T>G                   | TTA=>TGA     | Leu=>Stop         | p.L187*                | nonsense          |

**Supplementary Table 5 continued. A list of all confirmed somatic mutations detected in the 97 TCCs.**

| Gene Symbol | Tumor ID | Nucleotide (genomic)#           | Nucleotide (cDNA)\$ | Codon change | Amino acid change | Amino acid (protein)§ | Mutation Type     |
|-------------|----------|---------------------------------|---------------------|--------------|-------------------|-----------------------|-------------------|
| UTX         | B105     | g.chrX:44803468A>G              | c.1007A>G           | GAT=>GGT     | Asp=>Gly          | p.D336G               | missense          |
| UTX         | B111     | g.chrX:44830137T>A              | c.3517T>A           | TAC=>AAC     | Tyr=>Asn          | p.Y1173N              | missense          |
| UTX         | B114     | g.chrX:44834051G>A              | c.3668G>A           | GGC=>GAC     | Gly=>Asp          | p.G1223D              | missense          |
| UTX         | B16      | g.chrX:44823540_44823543delAGTA | c.857_857delA       | -            | -                 | -                     | Frame shift indel |
| UTX         | B57      | g.chrX:44823355A>T              | c.2959A>T           | AAA=>TAA     | Lys=>Stop         | p.K987*               | nonsense          |
| UTX         | B57      | g.chrX:44827761C>T              | c.3397C>T           | CAA=>TAA     | Gln=>Stop         | p.Q1133*              | nonsense          |
| UTX         | B66      | g.chrX:44827705C>T              | c.3341C>T           | TCA=>TTA     | Ser=>Leu          | p.S1114L              | missense          |
| UTX         | B69      | g.chrX:44827715_44827717delTCT  | c.856_858delTCT     | -            | -                 | -                     | p.S286_286del     |
| UTX         | B77      | g.chrX:44807610G>C              | -                   | -            | -                 | -                     | spliceSite        |
| UTX         | B79      | g.chrX:44854391C>T              | c.4129C>T           | CAG=>TAG     | Gln=>Stop         | p.Q1377*              | nonsense          |
| UTX         | B82      | g.chrX:44813948insA             | c.2102insA          | -            | -                 | -                     | Frame shift indel |
| UTX         | B83      | g.chrX:44822653C>G              | c.2897C>G           | CCT=>CGT     | Pro=>Arg          | p.P966R               | missense          |
| UTX         | B85-0    | g.chrX:44814168C>G              | c.2324C>G           | TCA=>TGA     | Ser=>Stop         | p.S775*               | nonsense          |
| UTX         | B85-2    | g.chrX:44833965G>A              | c.3582G>A           | TGG=>TGA     | Trp=>Stop         | p.W1194*              | nonsense          |
| UTX         | B89-16   | g.chrX:44718869C>T              | c.349C>T            | CAG=>TAG     | Gln=>Stop         | p.Q117*               | nonsense          |
| UTX         | B89-4    | g.chrX:44823391G>T              | c.2995G>T           | GAA=>TAA     | Glu=>Stop         | p.E999*               | nonsense          |
| UTX         | B89-5    | g.chrX:44718898C>G              | c.378C>G            | TAC=>TAG     | Tyr=>Stop         | p.Y126*               | nonsense          |
| UTX         | B90      | g.chrX:44803566C>T              | c.1105C>T           | CAG=>TAG     | Gln=>Stop         | p.Q369*               | nonsense          |
| UTX         | B96      | g.chrX:44807746C>T              | c.1663C>T           | CAG=>TAG     | Gln=>Stop         | p.Q555*               | nonsense          |
| UVRAG       | B69      | g.chr11:75504653G>A             | c.1343G>A           | CGG=>CAG     | Arg=>Gln          | p.R448Q               | missense          |
| UVRAG       | B9       | g.chr11:75529941G>C             | c.1936G>C           | GGT=>CGT     | Gly=>Arg          | p.G646R               | missense          |
| VPS13B      | B112     | g.chr8:100274384A>T             | c.2438A>T           | CAA=>CTA     | Gln=>Leu          | p.Q813L               | missense          |
| VPS13B      | B64      | g.chr8:100095244A>G             | c.52A>G             | ATC=>GTC     | Ile=>Val          | p.I18V                | missense          |
| VPS13B      | B69      | g.chr8:100589248G>A             | c.4232G>A           | CGC=>CAC     | Arg=>His          | p.R1411H              | missense          |
| VPS13B      | B71      | g.chr8:100588596G>C             | c.4213G>C           | GAA=>CAA     | Glu=>Gln          | p.E1405Q              | missense          |
| VPS13B      | B80-0    | g.chr8:100658896G>C             | c.5079G>C           | GAG=>GAC     | Glu=>Asp          | p.E1693D              | missense          |
| YAP1        | B10      | g.chr11:101490268G>A            | c.505G>A            | GAT=>AAT     | Asp=>Asn          | p.D169N               | missense          |
| ZDHHC23     | B10      | g.chr3:115155509G>C             | c.434G>C            | GGA=>GCA     | Gly=>Ala          | p.G145A               | missense          |
| ZFH3        | B36      | g.chr16:71551124G>A             | c.422C>T            | GCG=>GTG     | Ala=>Val          | p.A141V               | missense          |
| ZFH3        | B60      | g.chr16:71550398G>A             | c.1148C>T           | TCC=>TTC     | Ser=>Phe          | p.S383F               | missense          |
| ZFH3        | B69      | g.chr16:71385957C>A             | c.8125G>T           | GCC=>TCC     | Ala=>Ser          | p.A2709S              | missense          |
| ZFH3        | B80      | g.chr16:71549289T>C             | c.2257A>G           | AAC=>GAC     | Asn=>Asp          | p.N753D               | missense          |
| ZFH3        | B80-0    | g.chr16:71384976G>A             | c.9106C>T           | CGG=>TGG     | Arg=>Trp          | p.R3036W              | missense          |
| ZIK1        | B5       | g.chr19:62793764A>T             | c.773A>T            | CAG=>CTG     | Gln=>Leu          | p.Q258L               | missense          |
| ZMYND10     | B5       | g.chr3:50357582C>G              | c.178G>C            | GAG=>CAG     | Glu=>Gln          | p.E60Q                | missense          |
| ZMYND8      | B21      | g.chr20:45338770T>G             | c.1175A>C           | AAC=>ACC     | Asn=>Thr          | p.N392T               | missense          |
| ZMYND8      | B66      | g.chr20:45311519G>A             | c.1693C>T           | CTC=>TTC     | Leu=>Phe          | p.L565F               | missense          |
| ZMYND8      | B89-3    | g.chr20:45356915C>G             | c.469G>C            | GAA=>CAA     | Glu=>Gln          | p.E157Q               | missense          |
| ZNF174      | B13      | g.chr16:3398555A>T              | c.859A>T            | AGC=>TGC     | Ser=>Cys          | p.S287C               | missense          |
| ZNF174      | B65      | g.chr16:3398475C>T              | c.779C>T            | TCA=>TTA     | Ser=>Leu          | p.S260L               | missense          |
| ZNF295      | B5       | g.chr21:42287117C>T             | c.157G>A            | GAA=>AAA     | Glu=>Lys          | p.E53K                | missense          |
| ZNF471      | B15      | g.chr19:61719525C>G             | c.103C>G            | CAG=>GAG     | Gln=>Glu          | p.Q35E                | missense          |
| ZNF502      | B10      | g.chr3:44738353G>C              | c.1040G>C           | GGA=>GCA     | Gly=>Ala          | p.G347A               | missense          |
| ZNF536      | B15      | g.chr19:35717711C>T             | c.2288C>T           | TCC=>TTC     | Ser=>Phe          | p.S763F               | missense          |
| ZNF623      | B106     | g.chr8:144804645A>G             | c.1460A>G           | TAT=>TGT     | Tyr=>Cys          | p.Y487C               | missense          |
| ZNF623      | B5       | g.chr8:144804284A>T             | c.1099A>T           | AGA=>TGA     | Arg=>Stop         | p.R367*               | nonsense          |
| ZNF80       | B106     | g.chr3:115438210C>G             | c.402G>C            | GAG=>GAC     | Glu=>Asp          | p.E134D               | missense          |
| ZNF80       | B9       | g.chr3:115437890C>G             | c.722G>C            | GGA=>GCA     | Gly=>Ala          | p.G241A               | missense          |

#Genomic positions are coordinates in the hg18 UCSC release of the human genome. g., genomic sequence; c., cDNA sequence; p., protein sequence. \$Mutated positions indicate the sites in the protein-coding region of the cDNA sequence. § Frame shift indel, frameshift insertions and deletions; indel, in frame insertions and deletions which still change more than one single codon. \* Stop codon.

**Supplementary Table 6. The background mutation rates of different mutation types estimated from the Discovery Screen.**

| <b>Mutation type</b> | <b>No. of mutations</b> | <b>Background mutation rate<br/>(per Mb)</b> |
|----------------------|-------------------------|----------------------------------------------|
| A>C                  | 4                       | 0.06                                         |
| A>G                  | 12                      | 0.18                                         |
| A>T                  | 17                      | 0.25                                         |
| C>A at CpG           | 5                       | 0.81                                         |
| C>A at non CpG       | 24                      | 0.41                                         |
| C>G at CpG           | 1                       | 0.16                                         |
| C>G at non CpG       | 59                      | 1.00                                         |
| C>T at CpG           | 25                      | 4.06                                         |
| C>T at non CpG       | 69                      | 1.17                                         |
| G>A at CpG           | 36                      | 5.86                                         |
| G>A at non CpG       | 73                      | 1.26                                         |
| G>C at CpG           | 4                       | 0.65                                         |
| G>C at non CpG       | 58                      | 1.00                                         |
| G>T at CpG           | 2                       | 0.33                                         |
| G>T at non CpG       | 23                      | 0.40                                         |
| T>A                  | 8                       | 0.12                                         |
| T>C                  | 13                      | 0.19                                         |
| T>G                  | 3                       | 0.04                                         |
| indel                | 29                      | 0.11                                         |



**Supplementary Table 7. A list of the genes which showed significantly higher mutation rates than the background.**

| Gene Symbol | Missense mutations | Nonsense mutations | Indels | Splice site changes | Silent mutations | Total mutations | N:S ratio | P value (N:S)         | Patients harboring non-silent mutations | Nucleotides sufficiently covered (Mb) | Gene size (Kb) | P value (passenger probability) |
|-------------|--------------------|--------------------|--------|---------------------|------------------|-----------------|-----------|-----------------------|-----------------------------------------|---------------------------------------|----------------|---------------------------------|
| UTX         | 5                  | 11                 | 5      | 1                   | 1                | 23              | 22:1      | 1.54×10 <sup>-5</sup> | 20                                      | 0.40                                  | 4.21           | 2.22×10 <sup>-37</sup>          |
| TP53        | 13                 | 4                  | 1      | 3                   | 1                | 22              | 21:1      | 2.72×10 <sup>-5</sup> | 20                                      | 0.11                                  | 1.18           | 1.01×10 <sup>-49</sup>          |
| ARID1A      | 4                  | 11                 | 3      | 0                   | 0                | 18              | -         | 1.61×10 <sup>-5</sup> | 13                                      | 0.58                                  | 10.98          | 1.99×10 <sup>-32</sup>          |
| CREBBP      | 4                  | 9                  | 1      | 1                   | 2                | 17              | 15:2      | 3.35×10 <sup>-3</sup> | 13                                      | 0.61                                  | 7.33           | 3.42×10 <sup>-26</sup>          |
| EP300       | 6                  | 3                  | 4      | 0                   | 0                | 13              | -         | 3.46×10 <sup>-4</sup> | 13                                      | 0.76                                  | 7.25           | 6.58×10 <sup>-15</sup>          |
| RB1         | 3                  | 4                  | 0      | 4                   | 1                | 12              | 11:1      | 7.12×10 <sup>-3</sup> | 11                                      | 0.26                                  | 2.79           | 1.00×10 <sup>-11</sup>          |
| HRAS        | 10                 | 0                  | 0      | 0                   | 0                | 10              | -         | 2.17×10 <sup>-3</sup> | 10                                      | 0.05                                  | 1.08           | 7.89×10 <sup>-7</sup>           |
| FGFR3       | 9                  | 0                  | 0      | 0                   | 0                | 9               | -         | 4.01×10 <sup>-3</sup> | 9                                       | 0.14                                  | 4.51           | 1.69×10 <sup>-18</sup>          |
| LRP2        | 8                  | 1                  | 0      | 0                   | 0                | 9               | -         | 4.01×10 <sup>-3</sup> | 9                                       | 1.47                                  | 13.97          | 4.47×10 <sup>-10</sup>          |
| ERBB3       | 9                  | 0                  | 0      | 0                   | 2                | 11              | 9:2       | 5.85×10 <sup>-2</sup> | 8                                       | 0.42                                  | 4.03           | 3.28×10 <sup>-18</sup>          |
| LAMA4       | 8                  | 0                  | 0      | 0                   | 1                | 9               | 8:1       | 3.46×10 <sup>-2</sup> | 7                                       | 0.58                                  | 11.29          | 4.77×10 <sup>-9</sup>           |
| CHD6        | 6                  | 1                  | 0      | 0                   | 2                | 9               | 7:2       | 1.38×10 <sup>-1</sup> | 7                                       | 0.85                                  | 8.15           | 6.00×10 <sup>-9</sup>           |
| NF1         | 5                  | 1                  | 0      | 1                   | 1                | 8               | 7:1       | 5.76×10 <sup>-2</sup> | 7                                       | 0.86                                  | 16.98          | 8.76×10 <sup>-10</sup>          |
| MLL         | 5                  | 1                  | 2      | 0                   | 1                | 9               | 8:1       | 3.46×10 <sup>-2</sup> | 7                                       | 1.20                                  | 11.91          | 2.00×10 <sup>-11</sup>          |
| ANK2        | 7                  | 0                  | 0      | 0                   | 1                | 8               | 7:1       | 5.76×10 <sup>-2</sup> | 7                                       | 1.23                                  | 17.49          | 3.07×10 <sup>-8</sup>           |
| NCOR1       | 5                  | 0                  | 0      | 2                   | 0                | 7               | -         | 1.37×10 <sup>-2</sup> | 6                                       | 0.72                                  | 7.32           | 3.21×10 <sup>-6</sup>           |
| KRAS        | 6                  | 0                  | 0      | 0                   | 1                | 7               | 6:1       | 9.47×10 <sup>-2</sup> | 6                                       | 0.07                                  | 1.14           | 3.29×10 <sup>-26</sup>          |
| ESPL1       | 5                  | 1                  | 0      | 0                   | 1                | 7               | 6:1       | 9.47×10 <sup>-2</sup> | 6                                       | 0.63                                  | 6.36           | 2.76×10 <sup>-11</sup>          |
| MLL3        | 2                  | 3                  | 1      | 0                   | 1                | 7               | 6:1       | 9.47×10 <sup>-2</sup> | 5                                       | 1.52                                  | 26.81          | 1.58×10 <sup>-6</sup>           |
| ANK3        | 5                  | 0                  | 0      | 0                   | 1                | 6               | 5:1       | 1.54×10 <sup>-1</sup> | 5                                       | 1.41                                  | 16.14          | 9.10×10 <sup>-4</sup>           |
| ZFH3        | 5                  | 0                  | 0      | 0                   | 0                | 5               | -         | 1.54×10 <sup>-1</sup> | 5                                       | 1.04                                  | 11.11          | 5.52×10 <sup>-3</sup>           |
| LN3         | 4                  | 0                  | 0      | 0                   | 1                | 5               | 4:1       | 2.44×10 <sup>-1</sup> | 4                                       | 0.20                                  | 1.90           | 4.26×10 <sup>-4</sup>           |
| SEMA6D      | 4                  | 0                  | 0      | 0                   | 0                | 4               | -         | 8.61×10 <sup>-2</sup> | 4                                       | 0.34                                  | 15.53          | 7.10×10 <sup>-4</sup>           |
| ADCY2       | 4                  | 0                  | 0      | 0                   | 0                | 4               | -         | 8.61×10 <sup>-2</sup> | 4                                       | 0.34                                  | 3.28           | 1.74×10 <sup>-3</sup>           |
| ATG2B       | 4                  | 0                  | 0      | 1                   | 0                | 5               | -         | 4.66×10 <sup>-2</sup> | 4                                       | 0.63                                  | 6.24           | 2.42×10 <sup>-3</sup>           |
| NFE2L3      | 5                  | 1                  | 0      | 0                   | 1                | 7               | 6:1       | 9.47×10 <sup>-2</sup> | 4                                       | 0.16                                  | 2.09           | 1.33×10 <sup>-17</sup>          |
| NLRP14      | 2                  | 1                  | 0      | 0                   | 0                | 3               | -         | 1.59×10 <sup>-1</sup> | 3                                       | 0.35                                  | 3.28           | 1.45×10 <sup>-5</sup>           |
| ALS2CR11    | 2                  | 1                  | 0      | 0                   | 0                | 3               | -         | 1.59×10 <sup>-1</sup> | 3                                       | 0.18                                  | 1.87           | 4.69×10 <sup>-5</sup>           |
| SRRM2       | 4                  | 0                  | 0      | 0                   | 1                | 5               | 4:1       | 2.44×10 <sup>-1</sup> | 3                                       | 0.79                                  | 8.26           | 9.26×10 <sup>-5</sup>           |
| OPCML       | 3                  | 0                  | 0      | 0                   | 1                | 4               | 3:1       | 3.78×10 <sup>-1</sup> | 3                                       | 0.12                                  | 2.06           | 1.13×10 <sup>-4</sup>           |
| KIAA0141    | 3                  | 0                  | 0      | 0                   | 0                | 3               | -         | 1.59×10 <sup>-1</sup> | 3                                       | 0.16                                  | 1.55           | 3.73×10 <sup>-4</sup>           |
| NPR2        | 3                  | 0                  | 0      | 0                   | 0                | 3               | -         | 1.59×10 <sup>-1</sup> | 3                                       | 0.32                                  | 6.13           | 3.91×10 <sup>-4</sup>           |
| DISP1       | 3                  | 0                  | 0      | 0                   | 1                | 4               | 3:1       | 3.78×10 <sup>-1</sup> | 3                                       | 0.48                                  | 4.58           | 7.65×10 <sup>-4</sup>           |
| PLCB1       | 2                  | 1                  | 0      | 0                   | 0                | 3               | -         | 1.59×10 <sup>-1</sup> | 3                                       | 0.40                                  | 7.17           | 8.41×10 <sup>-4</sup>           |
| MERTK       | 3                  | 0                  | 0      | 0                   | 1                | 4               | 3:1       | 3.78×10 <sup>-1</sup> | 3                                       | 0.31                                  | 3.00           | 1.06×10 <sup>-3</sup>           |
| SH3RF1      | 3                  | 0                  | 0      | 0                   | 0                | 3               | -         | 1.59×10 <sup>-1</sup> | 3                                       | 0.27                                  | 2.67           | 1.23×10 <sup>-3</sup>           |
| TAOK3       | 3                  | 0                  | 0      | 0                   | 0                | 3               | -         | 1.59×10 <sup>-1</sup> | 3                                       | 0.28                                  | 2.70           | 1.89×10 <sup>-3</sup>           |
| ZMYND8      | 3                  | 0                  | 0      | 0                   | 1                | 4               | 3:1       | 3.78×10 <sup>-1</sup> | 3                                       | 0.36                                  | 7.05           | 3.80×10 <sup>-3</sup>           |
| C1orf101    | 3                  | 0                  | 0      | 0                   | 1                | 4               | 3:1       | 3.78×10 <sup>-1</sup> | 3                                       | 0.25                                  | 2.50           | 8.89×10 <sup>-3</sup>           |
| FLNB        | 3                  | 0                  | 0      | 0                   | 1                | 4               | 3:1       | 3.78×10 <sup>-1</sup> | 3                                       | 0.81                                  | 7.81           | 9.88×10 <sup>-3</sup>           |
| CLSPN       | 3                  | 0                  | 0      | 0                   | 0                | 3               | -         | 1.59×10 <sup>-1</sup> | 3                                       | 0.41                                  | 4.02           | 1.06×10 <sup>-2</sup>           |
| KLC4        | 4                  | 0                  | 0      | 0                   | 0                | 4               | -         | 8.61×10 <sup>-2</sup> | 2                                       | 0.17                                  | 3.77           | 2.65×10 <sup>-6</sup>           |
| ZNF80       | 2                  | 0                  | 0      | 0                   | 0                | 2               | -         | 2.93×10 <sup>-1</sup> | 2                                       | 0.08                                  | 0.82           | 2.95×10 <sup>-4</sup>           |
| COL3A1      | 3                  | 0                  | 0      | 0                   | 0                | 3               | -         | 1.59×10 <sup>-1</sup> | 2                                       | 0.38                                  | 4.40           | 4.14×10 <sup>-4</sup>           |
| C4orf17     | 2                  | 0                  | 0      | 0                   | 0                | 2               | -         | 2.93×10 <sup>-1</sup> | 2                                       | 0.11                                  | 1.08           | 1.10×10 <sup>-3</sup>           |
| HEXA        | 2                  | 0                  | 0      | 0                   | 0                | 2               | -         | 2.93×10 <sup>-1</sup> | 2                                       | 0.15                                  | 1.59           | 2.22×10 <sup>-3</sup>           |
| AVL9        | 2                  | 0                  | 0      | 0                   | 0                | 2               | -         | 2.93×10 <sup>-1</sup> | 2                                       | 0.20                                  | 1.95           | 3.05×10 <sup>-3</sup>           |
| MTBP        | 2                  | 0                  | 0      | 0                   | 0                | 2               | -         | 2.93×10 <sup>-1</sup> | 2                                       | 0.28                                  | 2.72           | 4.40×10 <sup>-3</sup>           |
| CD86        | 2                  | 0                  | 0      | 0                   | 0                | 2               | -         | 2.93×10 <sup>-1</sup> | 2                                       | 0.10                                  | 1.96           | 4.76×10 <sup>-3</sup>           |

**Supplementary Table 7 continued. A list of the genes which showed significantly higher mutation rates than the background.**

| Gene Symbol | Missense mutations | Nonsense mutations | Indels | Splice site changes | Silent mutations | Total mutations | N:S ratio | <i>P</i> value (N:S)  | Patients harboring non-silent mutations | Nucleotides sufficiently covered (Mb) | Gene size (Kb) | <i>P</i> value (passenger probability) |
|-------------|--------------------|--------------------|--------|---------------------|------------------|-----------------|-----------|-----------------------|-----------------------------------------|---------------------------------------|----------------|----------------------------------------|
| PPP1R9A     | 2                  | 0                  | 0      | 0                   | 0                | 2               | -         | 2.93×10 <sup>-1</sup> | 2                                       | 0.35                                  | 3.30           | 8.99×10 <sup>-3</sup>                  |
| SPAG1       | 2                  | 1                  | 0      | 0                   | 0                | 3               | -         | 1.59×10 <sup>-1</sup> | 2                                       | 0.24                                  | 2.78           | 9.74×10 <sup>-3</sup>                  |
| IL18RAP     | 1                  | 1                  | 0      | 0                   | 0                | 2               | -         | 2.93×10 <sup>-1</sup> | 2                                       | 0.18                                  | 1.80           | 1.04×10 <sup>-2</sup>                  |
| C15orf55    | 2                  | 0                  | 0      | 0                   | 0                | 2               | -         | 2.93×10 <sup>-1</sup> | 2                                       | 0.35                                  | 3.40           | 1.58×10 <sup>-2</sup>                  |
| TRIM23      | 2                  | 0                  | 0      | 0                   | 0                | 2               | -         | 2.93×10 <sup>-1</sup> | 2                                       | 0.18                                  | 5.08           | 1.74×10 <sup>-2</sup>                  |

N:S, non-silent : silent mutation.

**Supplementary Table 8. Permutation analysis of concurrence and mutual exclusion of mutations in the frequently mutated genes.**

| Gene1       | Gene2        | No. of samples with mutations in Gene1 | No. of samples with mutations in Gene2 | No. of samples with mutations in both genes | No. of samples with mutations in only one gene | Expected No. of samples with mutations in both genes by permutation | Expected No. of samples with mutations in only one gene by permutation | <i>P</i> value of mutations concurrence | <i>P</i> value of mutual exclusion among mutations |
|-------------|--------------|----------------------------------------|----------------------------------------|---------------------------------------------|------------------------------------------------|---------------------------------------------------------------------|------------------------------------------------------------------------|-----------------------------------------|----------------------------------------------------|
| <i>ANK2</i> | <i>ANK3</i>  | 7                                      | 5                                      | 4                                           | 4                                              | 0.61349                                                             | 10.77303                                                               | 0.0004309                               | 0.999995                                           |
| <i>ANK2</i> | <i>CHD6</i>  | 7                                      | 7                                      | 3                                           | 8                                              | 0.85372                                                             | 12.29255                                                               | 0.0328197                               | 0.997301                                           |
| <i>CHD6</i> | <i>LRP2</i>  | 7                                      | 9                                      | 4                                           | 8                                              | 1.08983                                                             | 13.82033                                                               | 0.0084993                               | 0.999474                                           |
| <i>LRP2</i> | <i>MLL</i>   | 9                                      | 7                                      | 3                                           | 10                                             | 1.08964                                                             | 13.82072                                                               | 0.0683443                               | 0.991557                                           |
| <i>LRP2</i> | <i>ZFHX3</i> | 9                                      | 5                                      | 3                                           | 8                                              | 0.78313                                                             | 12.43375                                                               | 0.0237094                               | 0.998556                                           |
| <i>HRAS</i> | <i>TP53</i>  | 10                                     | 20                                     | 0                                           | 30                                             | 3.29707                                                             | 23.40586                                                               | 1                                       | 0.0125049                                          |
| <i>HRAS</i> | <i>UTX</i>   | 10                                     | 21                                     | 1                                           | 29                                             | 3.44959                                                             | 24.10081                                                               | 0.990274                                | 0.0440656                                          |
| <i>KRAS</i> | <i>UTX</i>   | 6                                      | 21                                     | 0                                           | 27                                             | 2.09287                                                             | 22.81426                                                               | 1                                       | 0.0468466                                          |
| <i>TP53</i> | <i>ANK2</i>  | 20                                     | 7                                      | 0                                           | 27                                             | 2.32794                                                             | 22.34412                                                               | 1                                       | 0.0494707                                          |
| <i>TP53</i> | <i>FGFR3</i> | 20                                     | 9                                      | 0                                           | 29                                             | 2.97538                                                             | 23.04924                                                               | 1                                       | 0.0200616                                          |
| <i>TP53</i> | <i>KRAS</i>  | 20                                     | 6                                      | 0                                           | 26                                             | 2.00085                                                             | 21.9983                                                                | 1                                       | 0.0774966                                          |
